# Supplementary material for: Isolation of Sesquiterpenoids and Steroids from the Soft Coral Sinularia brassica and Determination of Their Absolute Configuration
Source: MDPI journal article supplement (doi:10.3390/md19090523), 2021-09-17
Supplement: s1 [file s1]

# Isolation of Sesquiterpenoids and Steroids from the Soft Coral *Sinularia brassica* and Determination of their Absolute Configuration

Giang Nam Pham<sup>1</sup>, Da Yeun Kang<sup>1</sup>, Min Ju Kim<sup>2</sup>, Se Jong Han<sup>2,3</sup>, Jun Hyuck Lee<sup>3,4</sup> and MinKyun Na<sup>1,\*</sup>

<sup>1</sup> College of Pharmacy, Chungnam National University, Daejeon 34134, Republic of Korea; nampg@cnu.ac.kr (P.G.N.); dykang@o.cnu.ac.kr (D.Y.K.)

<sup>2</sup> Division of Life Sciences, Korea Polar Research Institute, Incheon 21990, Republic of Korea; mjkim1113@kopri.re.kr (M.J.K.); hansj@kopri.re.kr (S.J.H.)

<sup>3</sup> Department of Polar Sciences, University of Science and Technology, Incheon 21990, Republic of Korea

<sup>4</sup> Research Unit of Cryogenic Novel Material, Korea Polar Research Institute, Incheon, 21990, Republic of Korea; junhyucklee@kopri.re.kr (J.H.L.)

\* Correspondence: mkna@cnu.ac.kr; Tel.: +82-42-823-6566 (M.N.)

## Contents

|                                                                                                 |    |
|-------------------------------------------------------------------------------------------------|----|
| Figure S1. HRESIMS of <b>1</b> .....                                                            | 4  |
| Figure S2. <sup>1</sup> H NMR spectrum of <b>1</b> in CDCl <sub>3</sub> .....                   | 5  |
| Figure S3. <sup>1</sup> H NMR spectrum of <b>1</b> in CDCl <sub>3</sub> (expanded) .....        | 6  |
| Figure S4. <sup>13</sup> C NMR spectrum of <b>1</b> in CDCl <sub>3</sub> .....                  | 7  |
| Figure S5. COSY spectrum of <b>1</b> in CDCl <sub>3</sub> .....                                 | 8  |
| Figure S6. HSQC spectrum of <b>1</b> in CDCl <sub>3</sub> .....                                 | 9  |
| Figure S7. HMBC spectrum of <b>1</b> in CDCl <sub>3</sub> .....                                 | 10 |
| Figure S8. HMBC spectrum of <b>1</b> in CDCl <sub>3</sub> (expanded).....                       | 11 |
| Figure S9. <sup>1</sup> H NMR data of <b>1</b> in DMSO- <i>d</i> <sub>6</sub> .....             | 12 |
| Figure S10. <sup>1</sup> H NMR data of <b>1</b> in DMSO- <i>d</i> <sub>6</sub> (expanded) ..... | 13 |
| Figure S11. <sup>13</sup> C NMR data of <b>1</b> in DMSO- <i>d</i> <sub>6</sub> .....           | 14 |
| Figure S12. COSY spectrum of <b>1</b> in DMSO- <i>d</i> <sub>6</sub> .....                      | 15 |
| Figure S13. HSQC spectrum of <b>1</b> in DMSO- <i>d</i> <sub>6</sub> .....                      | 16 |
| Figure S14. HMBC spectrum of <b>1</b> in DMSO- <i>d</i> <sub>6</sub> .....                      | 17 |
| Figure S15. HMBC spectrum of <b>1</b> in DMSO- <i>d</i> <sub>6</sub> (expanded) .....           | 18 |
| Figure S17. NOESY spectrum of <b>1</b> in DMSO- <i>d</i> <sub>6</sub> (expanded) .....          | 20 |
| Figure S18. HRESIMS of <b>2</b> .....                                                           | 21 |

|                                                                                        |    |
|----------------------------------------------------------------------------------------|----|
| Figure S19. $^1\text{H}$ NMR data of <b>2</b> in $\text{CDCl}_3$ .....                 | 22 |
| Figure S20. $^1\text{H}$ NMR data of <b>2</b> in $\text{CDCl}_3$ (expanded) .....      | 23 |
| Figure S21. $^{13}\text{C}$ NMR data of <b>2</b> in $\text{CDCl}_3$ .....              | 24 |
| Figure S22. COSY spectrum of <b>2</b> in $\text{CDCl}_3$ .....                         | 25 |
| Figure S23. HSQC spectrum of <b>2</b> in $\text{CDCl}_3$ .....                         | 26 |
| Figure S24. HMBC spectrum of <b>2</b> in $\text{CDCl}_3$ (expanded - 1).....           | 27 |
| Figure S25. HMBC spectrum of <b>2</b> in $\text{CDCl}_3$ (expanded - 2).....           | 28 |
| Figure S26. NOESY spectrum of <b>2</b> in $\text{CDCl}_3$ .....                        | 29 |
| Figure S27. $^1\text{H}$ NMR spectrum of <b>2</b> in $\text{DMSO}-d_6$ .....           | 30 |
| Figure S28. $^1\text{H}$ NMR spectrum of <b>2</b> in $\text{DMSO}-d_6$ (expanded)..... | 31 |
| Figure S29. $^{13}\text{C}$ NMR spectrum of <b>2</b> in $\text{DMSO}-d_6$ .....        | 32 |
| Figure S30. COSY spectrum of <b>2</b> in $\text{DMSO}-d_6$ .....                       | 33 |
| Figure S31. HSQC spectrum of <b>2</b> in $\text{DMSO}-d_6$ .....                       | 34 |
| Figure S32. HMBC spectrum of <b>2</b> in $\text{DMSO}-d_6$ (expanded - 1).....         | 35 |
| Figure S33. HMBC spectrum of <b>2</b> in $\text{DMSO}-d_6$ (expanded - 2).....         | 36 |
| Figure S34. NOESY spectrum of <b>2</b> in $\text{DMSO}-d_6$ .....                      | 37 |
| Figure S35. HRESIMS of <b>3</b> .....                                                  | 38 |
| Figure S36. $^1\text{H}$ NMR data of <b>3</b> in $\text{CDCl}_3$ .....                 | 39 |
| Figure S37. $^{13}\text{C}$ NMR data of <b>3</b> in $\text{CDCl}_3$ .....              | 40 |
| Figure S38. COSY spectrum of <b>3</b> in $\text{CDCl}_3$ .....                         | 41 |
| Figure S39. HSQC spectrum of <b>3</b> in $\text{CDCl}_3$ .....                         | 42 |
| Figure S40. HSQC spectrum of <b>3</b> in $\text{CDCl}_3$ (expanded).....               | 43 |
| Figure S41. HMBC spectrum of <b>3</b> in $\text{CDCl}_3$ .....                         | 44 |
| Figure S42. HMBC spectrum of <b>3</b> in $\text{CDCl}_3$ (expanded - 1).....           | 45 |
| Figure S43. HMBC spectrum of <b>3</b> in $\text{CDCl}_3$ (expanded- 2).....            | 46 |
| Figure S44. NOESY spectrum of <b>3</b> in $\text{CDCl}_3$ .....                        | 47 |
| Figure S45. NOESY spectrum of <b>3</b> in $\text{CDCl}_3$ (expanded) .....             | 48 |
| Figure S46. HRESIMS of <b>4</b> .....                                                  | 49 |
| Figure S47. $^1\text{H}$ NMR spectrum of <b>4</b> in $\text{CDCl}_3$ .....             | 50 |
| Figure S48. $^{13}\text{C}$ NMR spectrum of <b>4</b> in $\text{CDCl}_3$ .....          | 51 |

|                                                                                                                                                                                                                                                |    |
|------------------------------------------------------------------------------------------------------------------------------------------------------------------------------------------------------------------------------------------------|----|
| Figure S49. COSY spectrum of <b>4</b> in CDCl <sub>3</sub> .....                                                                                                                                                                               | 52 |
| Figure S50. HSQC spectrum of <b>4</b> in CDCl <sub>3</sub> .....                                                                                                                                                                               | 53 |
| Figure S51. HMBC spectrum of <b>4</b> in CDCl <sub>3</sub> .....                                                                                                                                                                               | 54 |
| Figure S52. NOESY spectrum of <b>4</b> in CDCl <sub>3</sub> .....                                                                                                                                                                              | 55 |
| Figure S53. ESI-MS of <b>5</b> .....                                                                                                                                                                                                           | 56 |
| Figure S54. <sup>1</sup> H NMR spectrum of <b>5</b> in CDCl <sub>3</sub> .....                                                                                                                                                                 | 57 |
| Figure S55. <sup>13</sup> C NMR spectrum of <b>5</b> in CDCl <sub>3</sub> .....                                                                                                                                                                | 58 |
| Figure S56. ESI-MS of <b>6</b> .....                                                                                                                                                                                                           | 59 |
| Figure S57. <sup>1</sup> H NMR spectrum of <b>6</b> in CDCl <sub>3</sub> .....                                                                                                                                                                 | 60 |
| Figure S58. <sup>13</sup> C NMR spectrum of <b>6</b> in CDCl <sub>3</sub> .....                                                                                                                                                                | 61 |
| Figure S59. <sup>1</sup> H NMR spectrum of <b>7</b> in CDCl <sub>3</sub> .....                                                                                                                                                                 | 62 |
| Figure S60. <sup>13</sup> C NMR spectrum of <b>7</b> in CDCl <sub>3</sub> .....                                                                                                                                                                | 63 |
| Figure S61. <sup>1</sup> H NMR spectrum of <b>8</b> in CDCl <sub>3</sub> .....                                                                                                                                                                 | 64 |
| Figure S62. <sup>13</sup> C NMR spectrum of <b>8</b> in CDCl <sub>3</sub> .....                                                                                                                                                                | 65 |
| Figure S63. Isolation scheme of <b>1</b> – <b>8</b> .....                                                                                                                                                                                      | 66 |
| Figure S64. Antimicrobial activity of <b>1</b> – <b>8</b> .....                                                                                                                                                                                | 67 |
| Table S1. Gibbs Free Energy and Boltzmann Population of <b>1a</b> (1 <i>R</i> , 2 <i>S</i> , 6 <i>R</i> , 7 <i>R</i> , 10 <i>R</i> ) and <b>1b</b> (1 <i>S</i> , 2 <i>R</i> , 6 <i>S</i> , 7 <i>S</i> , 10 <i>S</i> ) for ECD computation..... | 68 |
| Table S2. Gibbs Free Energy and Boltzmann Population of <b>2a</b> (1 <i>R</i> , 2 <i>S</i> , 6 <i>S</i> , 7 <i>R</i> , 10 <i>S</i> ) and <b>2b</b> (1 <i>S</i> , 2 <i>R</i> , 6 <i>R</i> , 7 <i>S</i> , 10 <i>R</i> ) for ECD computation..... | 69 |
| Table S3. Gibbs Free Energy and Boltzmann Population of 24 <i>S</i> isomer of <b>3</b> for NMR computation.....                                                                                                                                | 70 |
| Table S4. Gibbs Free Energy and Boltzmann Population of 24 <i>R</i> isomer of <b>3</b> for NMR computation.....                                                                                                                                | 71 |
| Table S5. Experimental and calculated NMR chemical shift values (ppm) of compound <b>3</b> with diastereomers 24 <i>S</i> and 24 <i>R</i> .....                                                                                                | 72 |

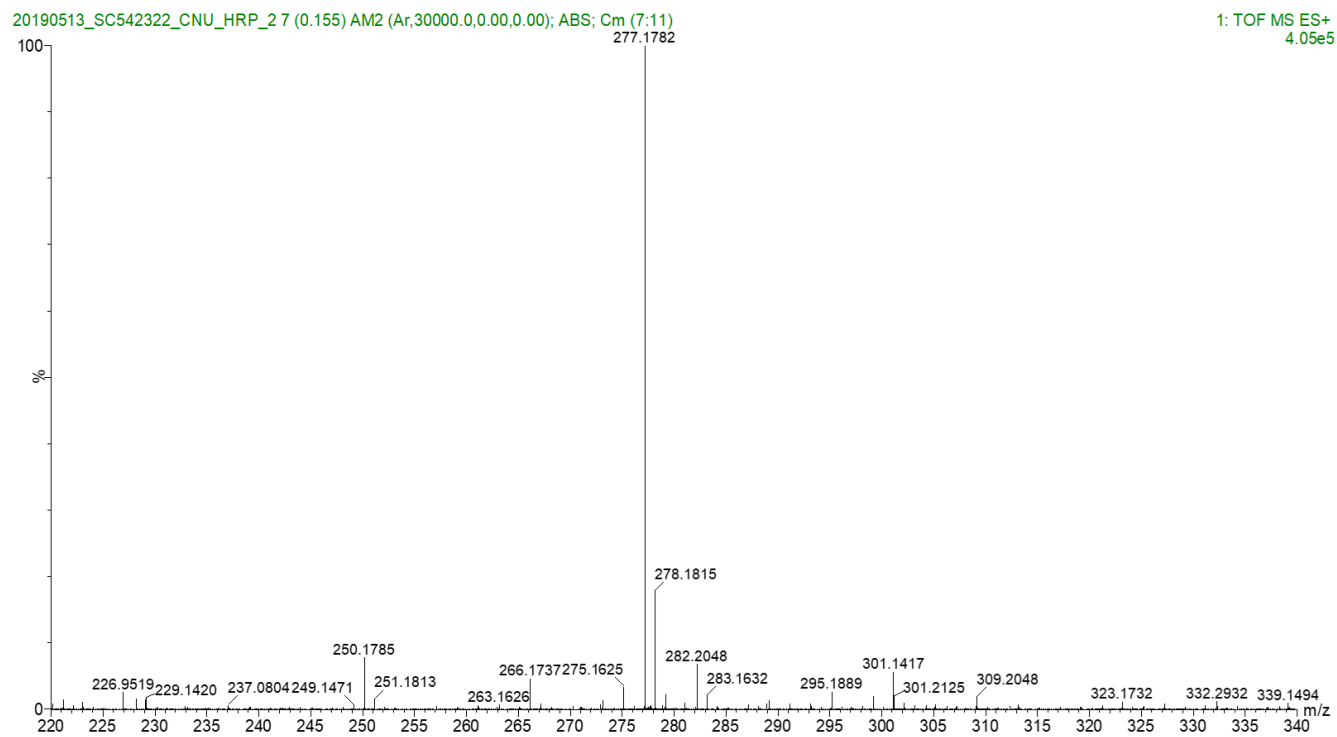

Figure S1. HRESIMS of **1**

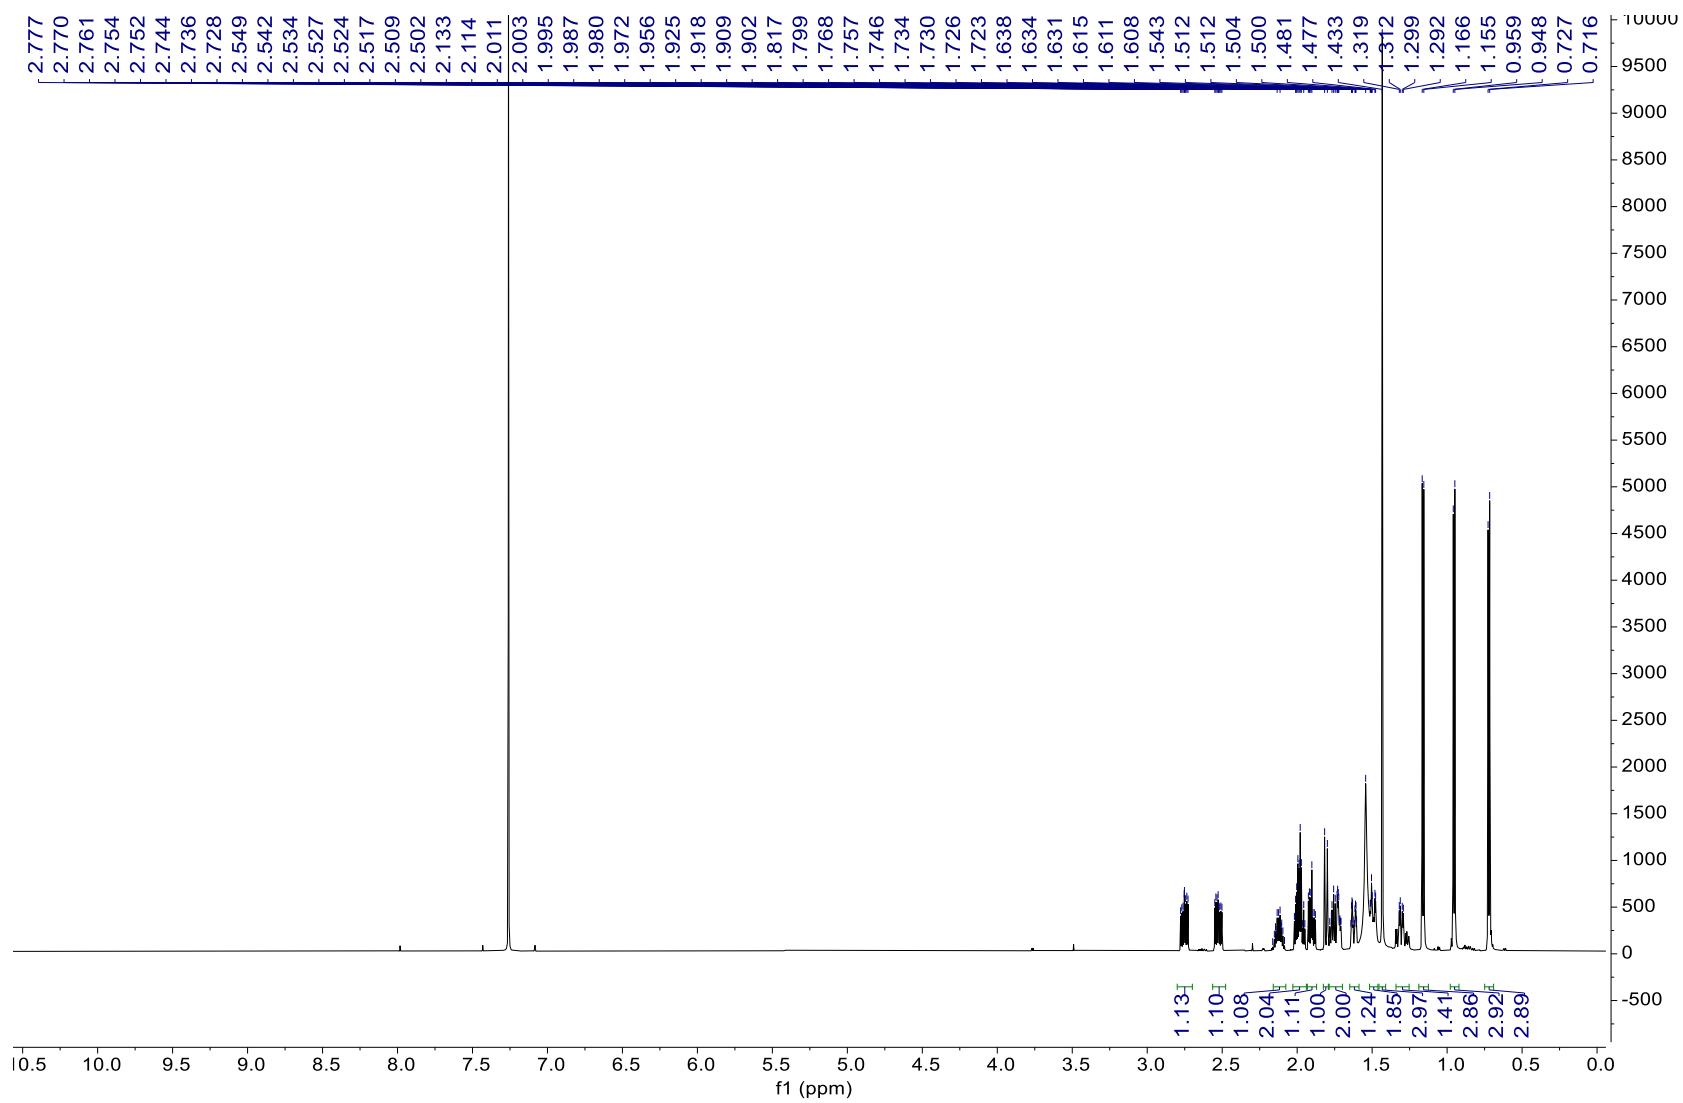

Figure S2. <sup>1</sup>H NMR spectrum of **1** in CDCl<sub>3</sub>

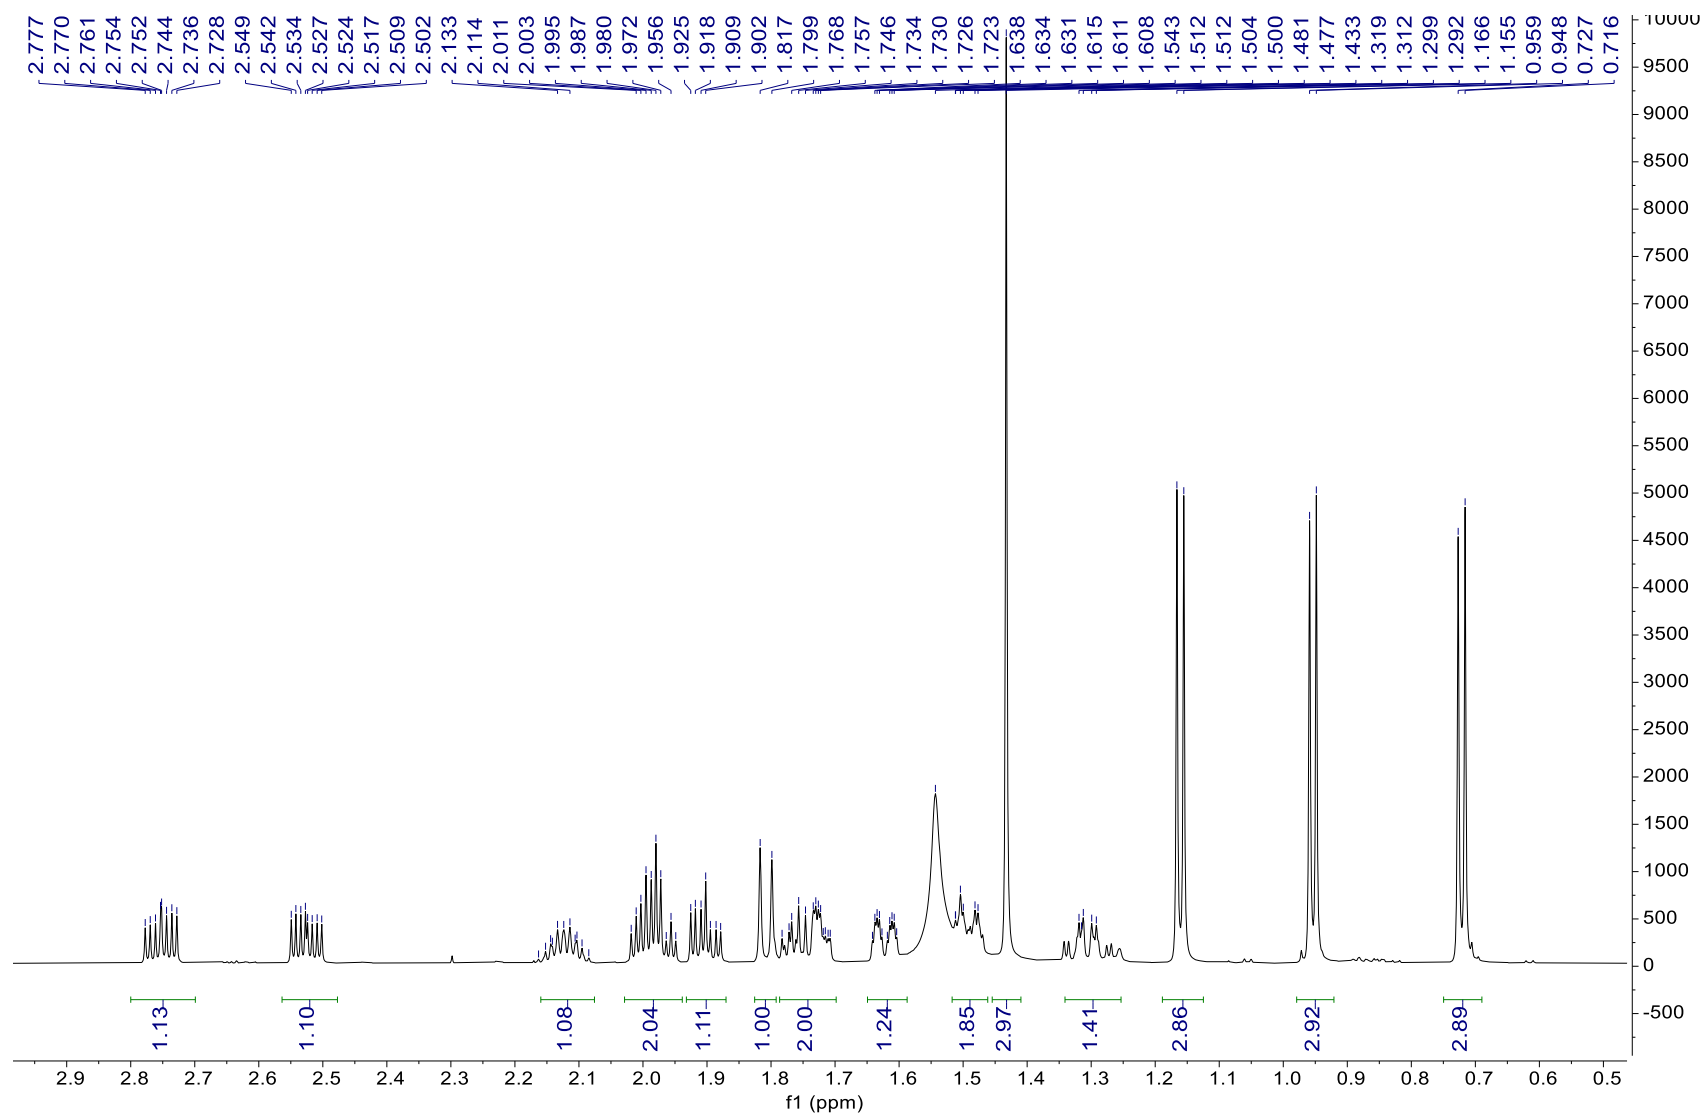

Figure S3.  $^1\text{H}$  NMR spectrum of **1** in  $\text{CDCl}_3$  (expanded)

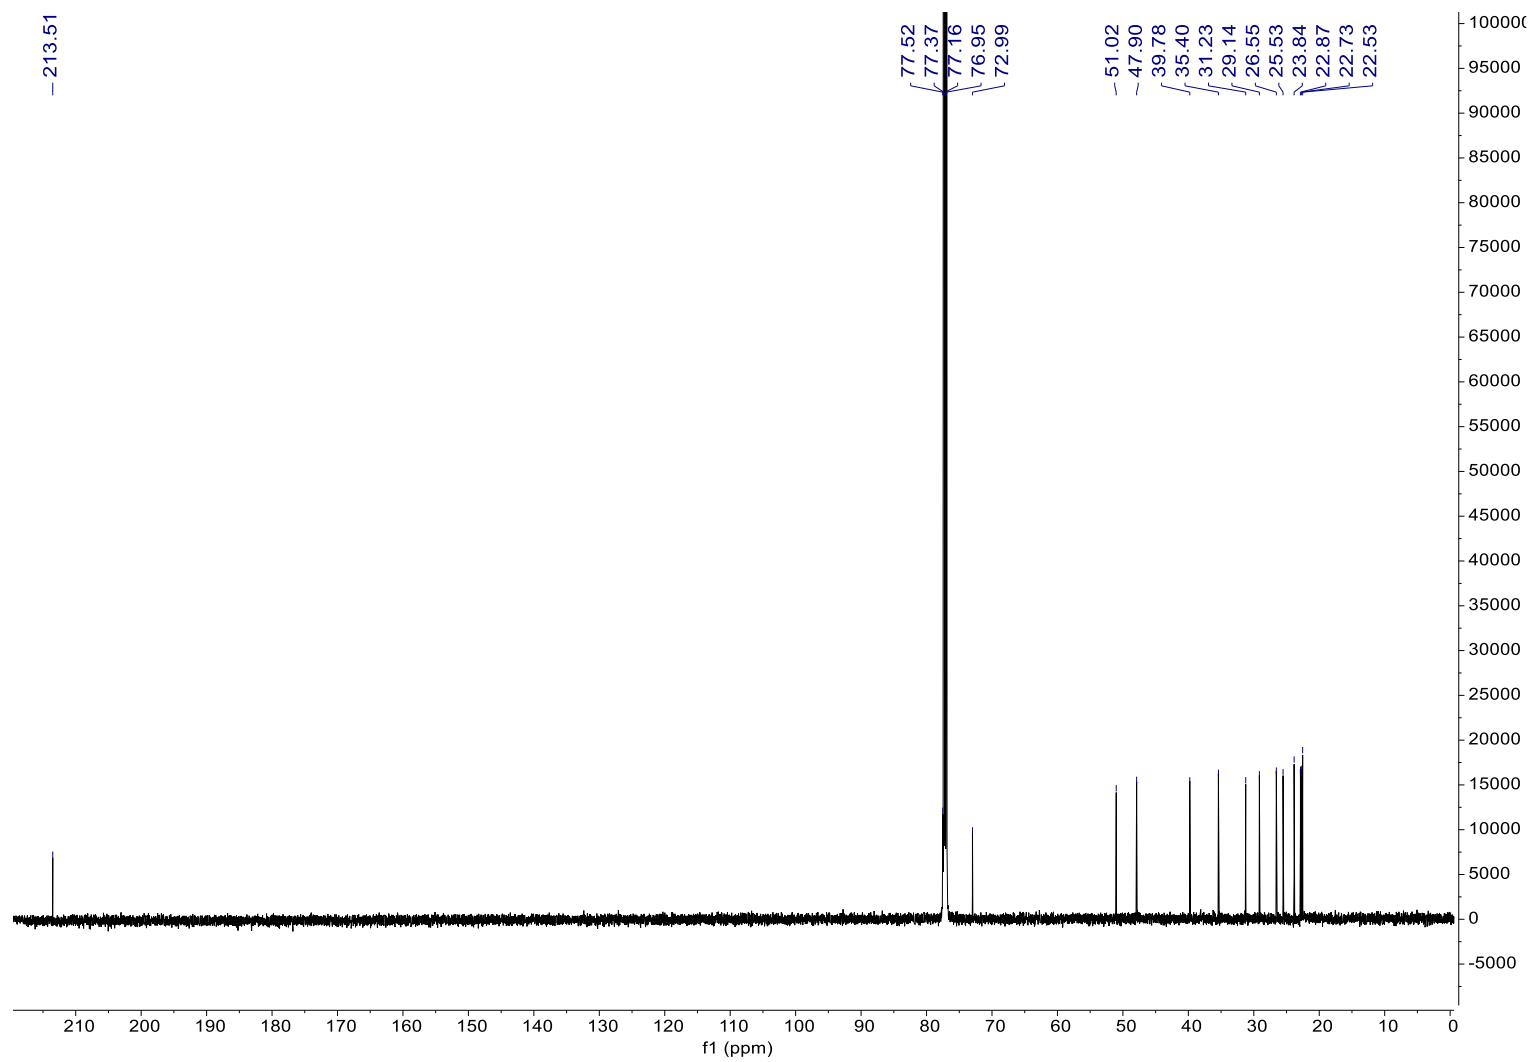

Figure S4.  $^{13}\text{C}$  NMR spectrum of **1** in  $\text{CDCl}_3$

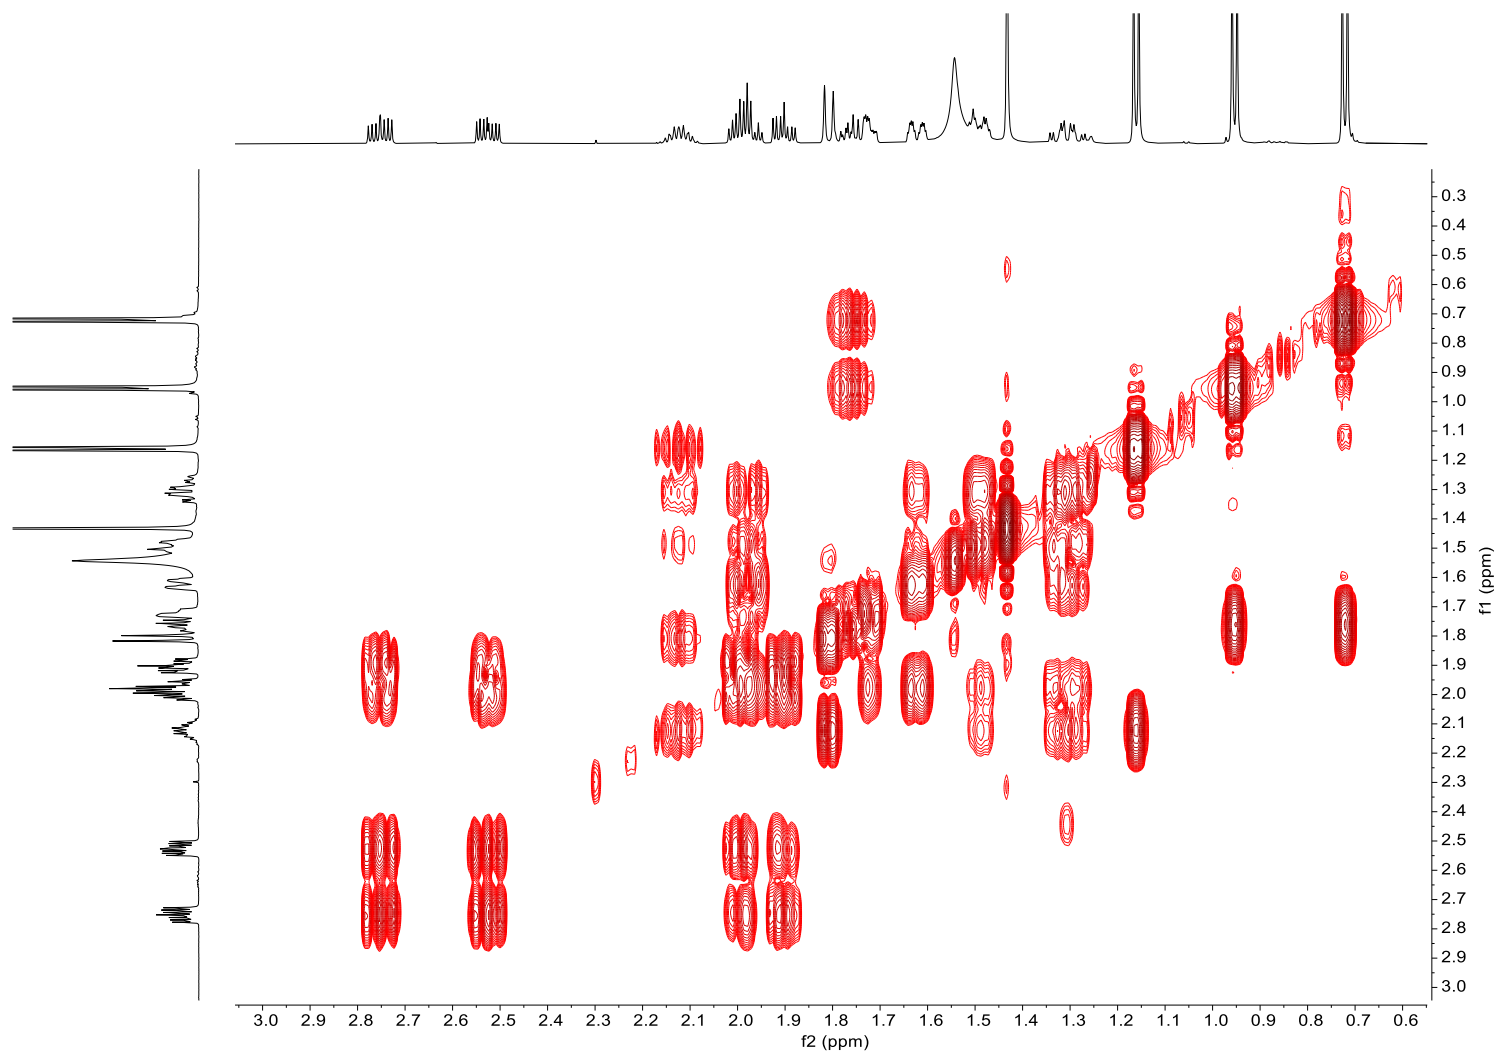

Figure S5. COSY spectrum of **1** in CDCl<sub>3</sub>



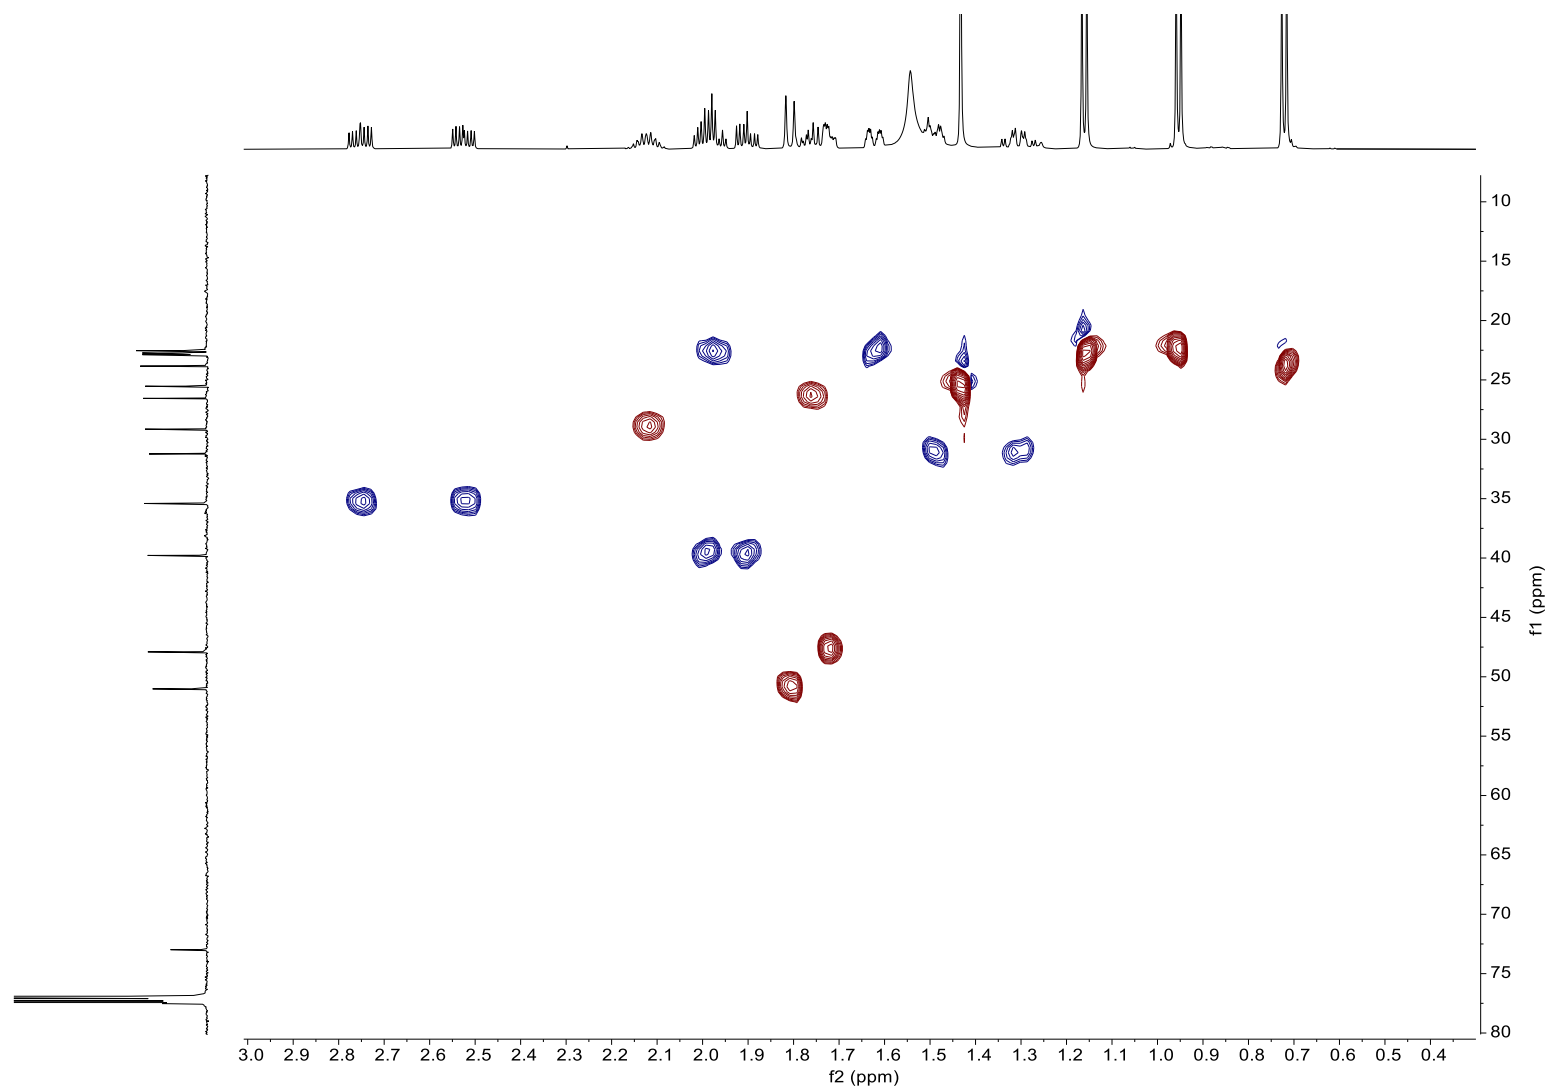

Figure S6. HSQC spectrum of **1** in  $\text{CDCl}_3$

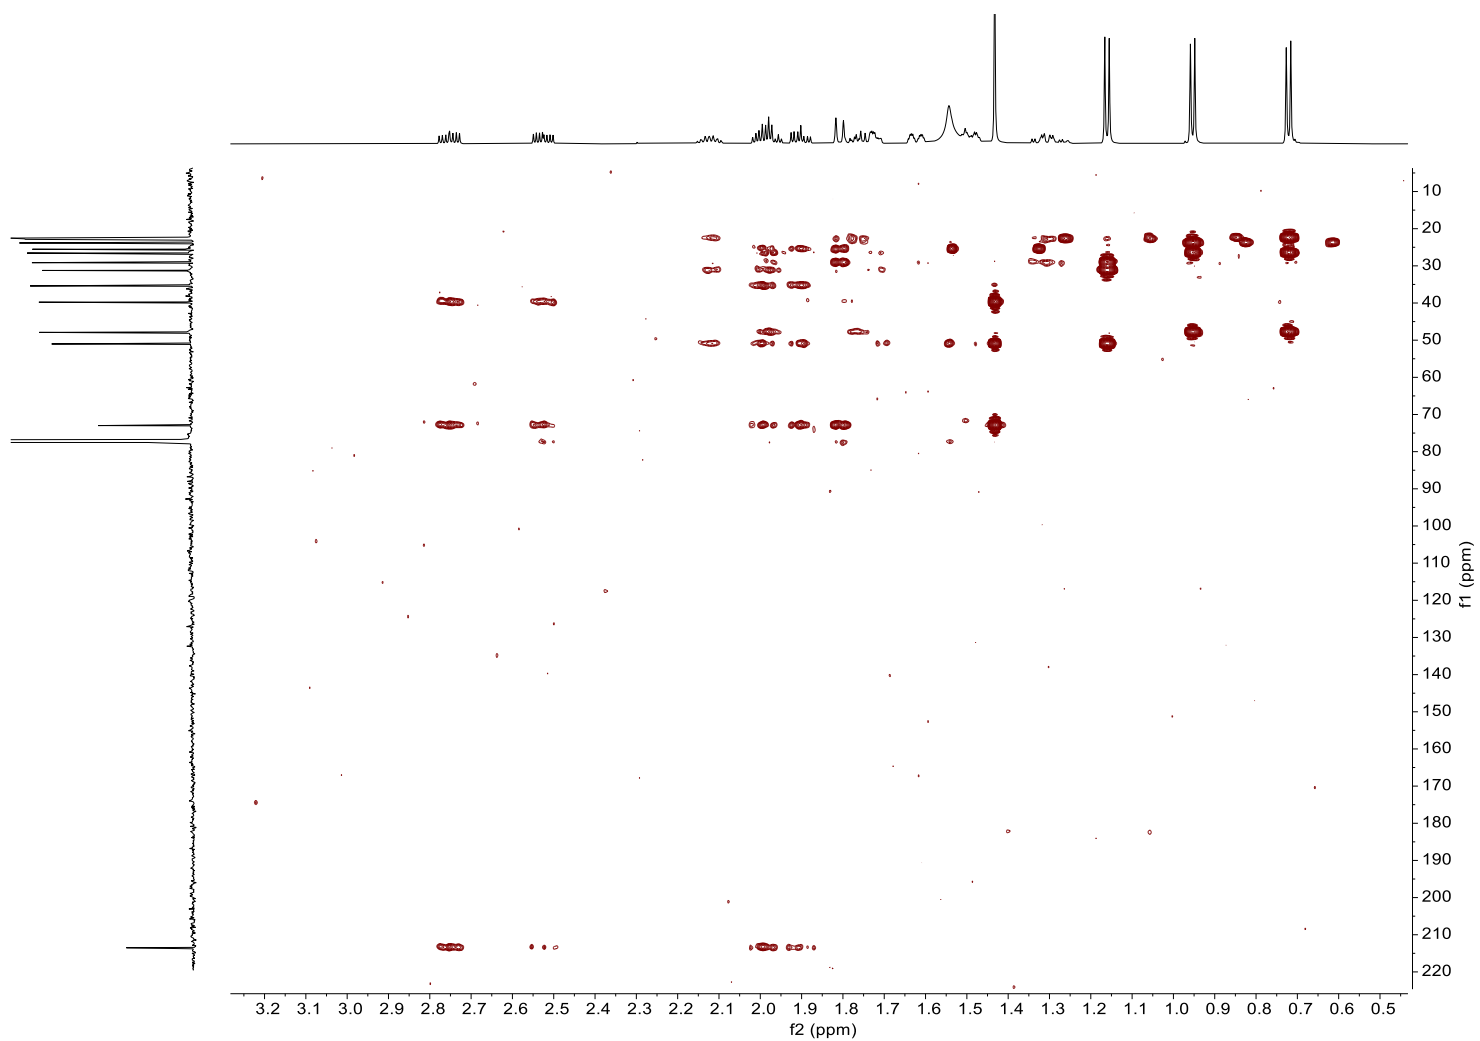

Figure S7. HMBC spectrum of 1 in CDCl<sub>3</sub>

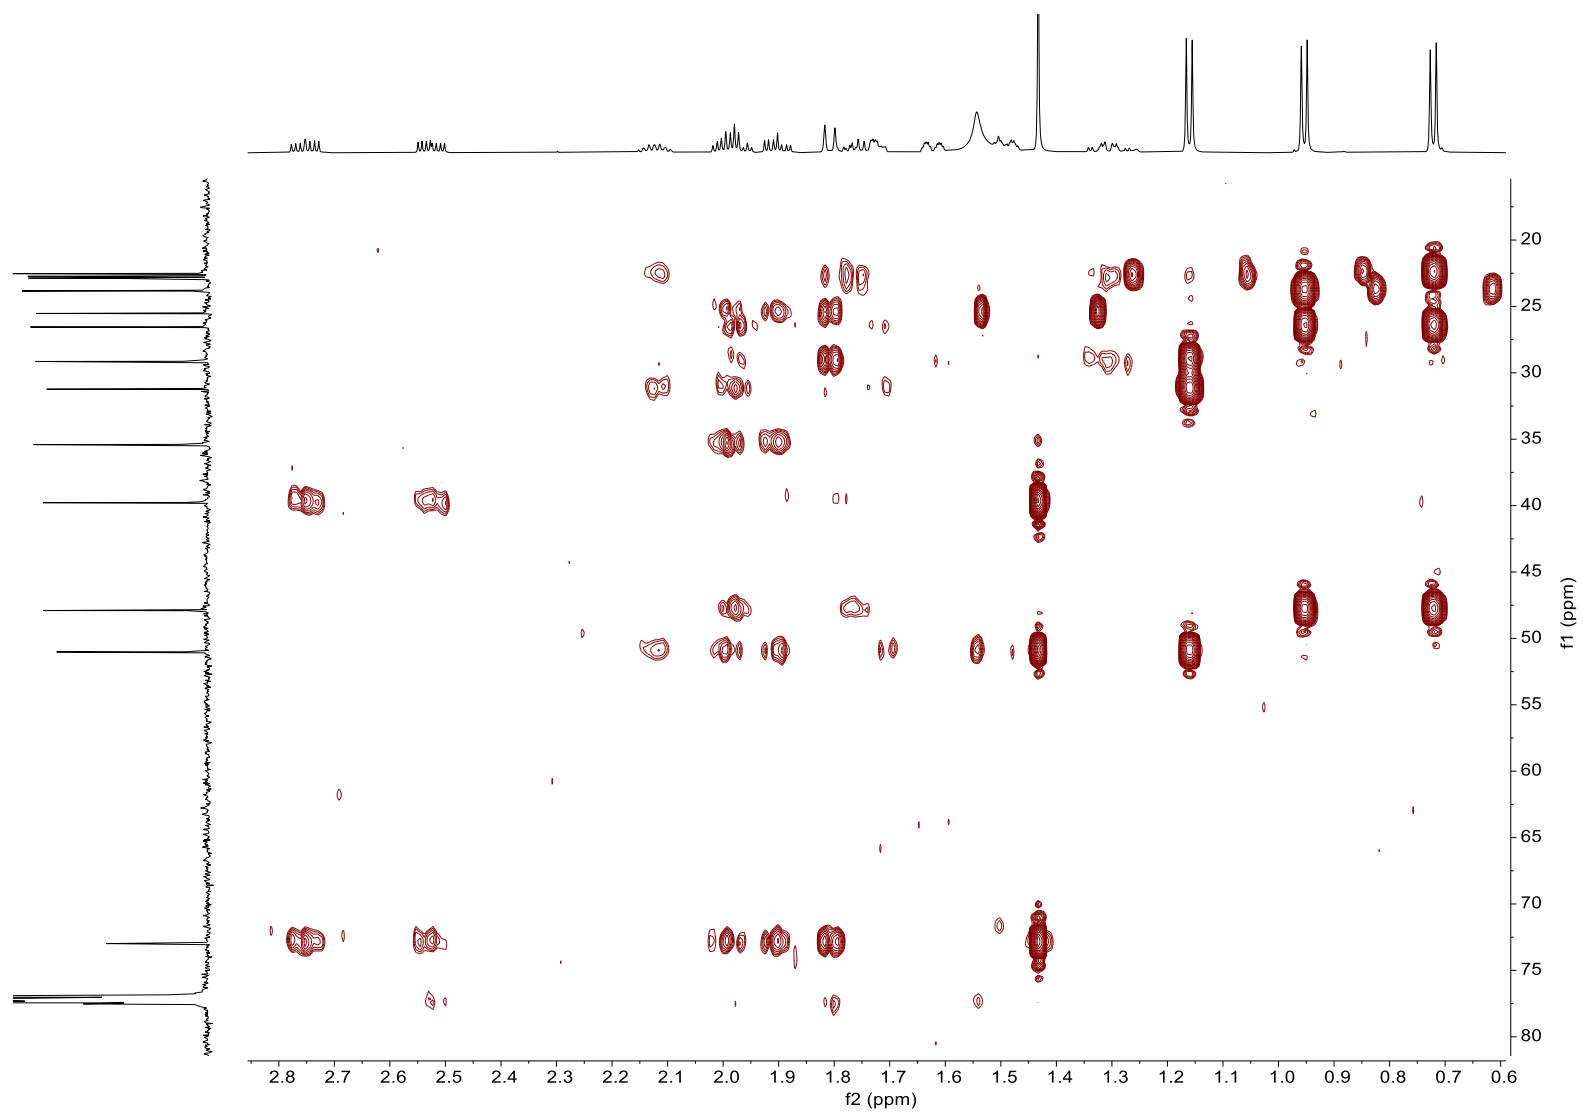

Figure S8. HMBC spectrum of **1** in CDCl<sub>3</sub> (expanded)

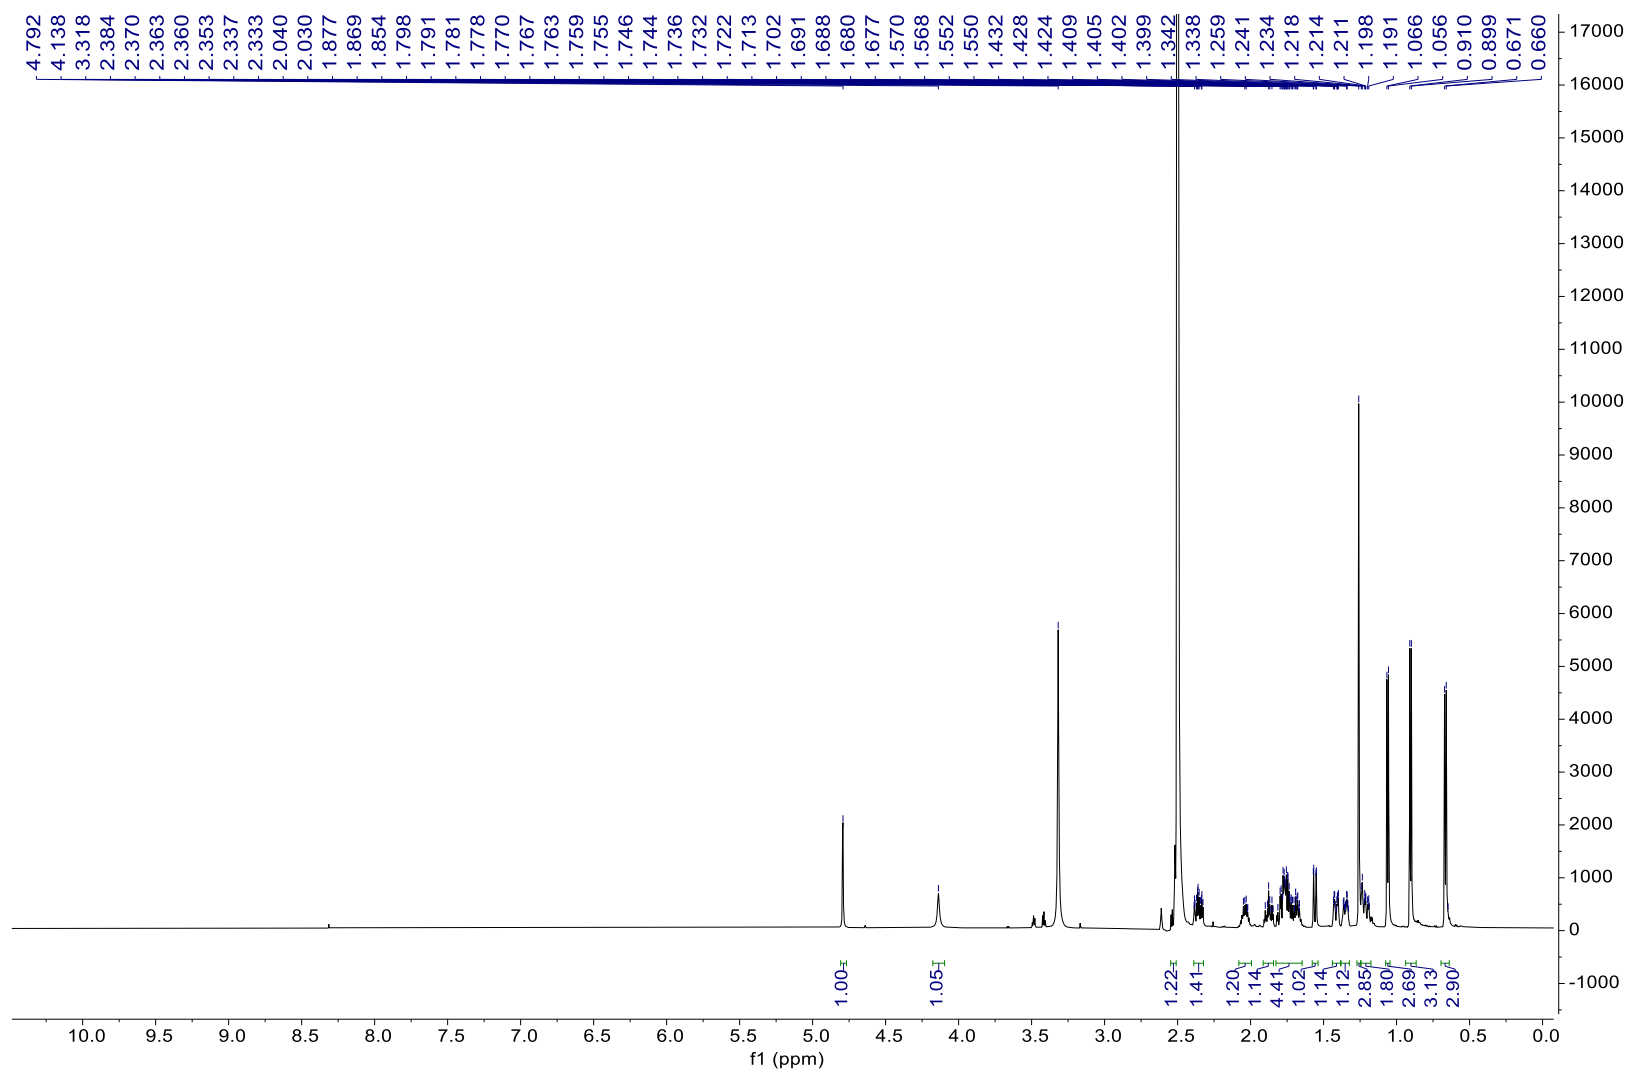

Figure S9.  $^1\text{H}$  NMR data of **1** in  $\text{DMSO}-d_6$

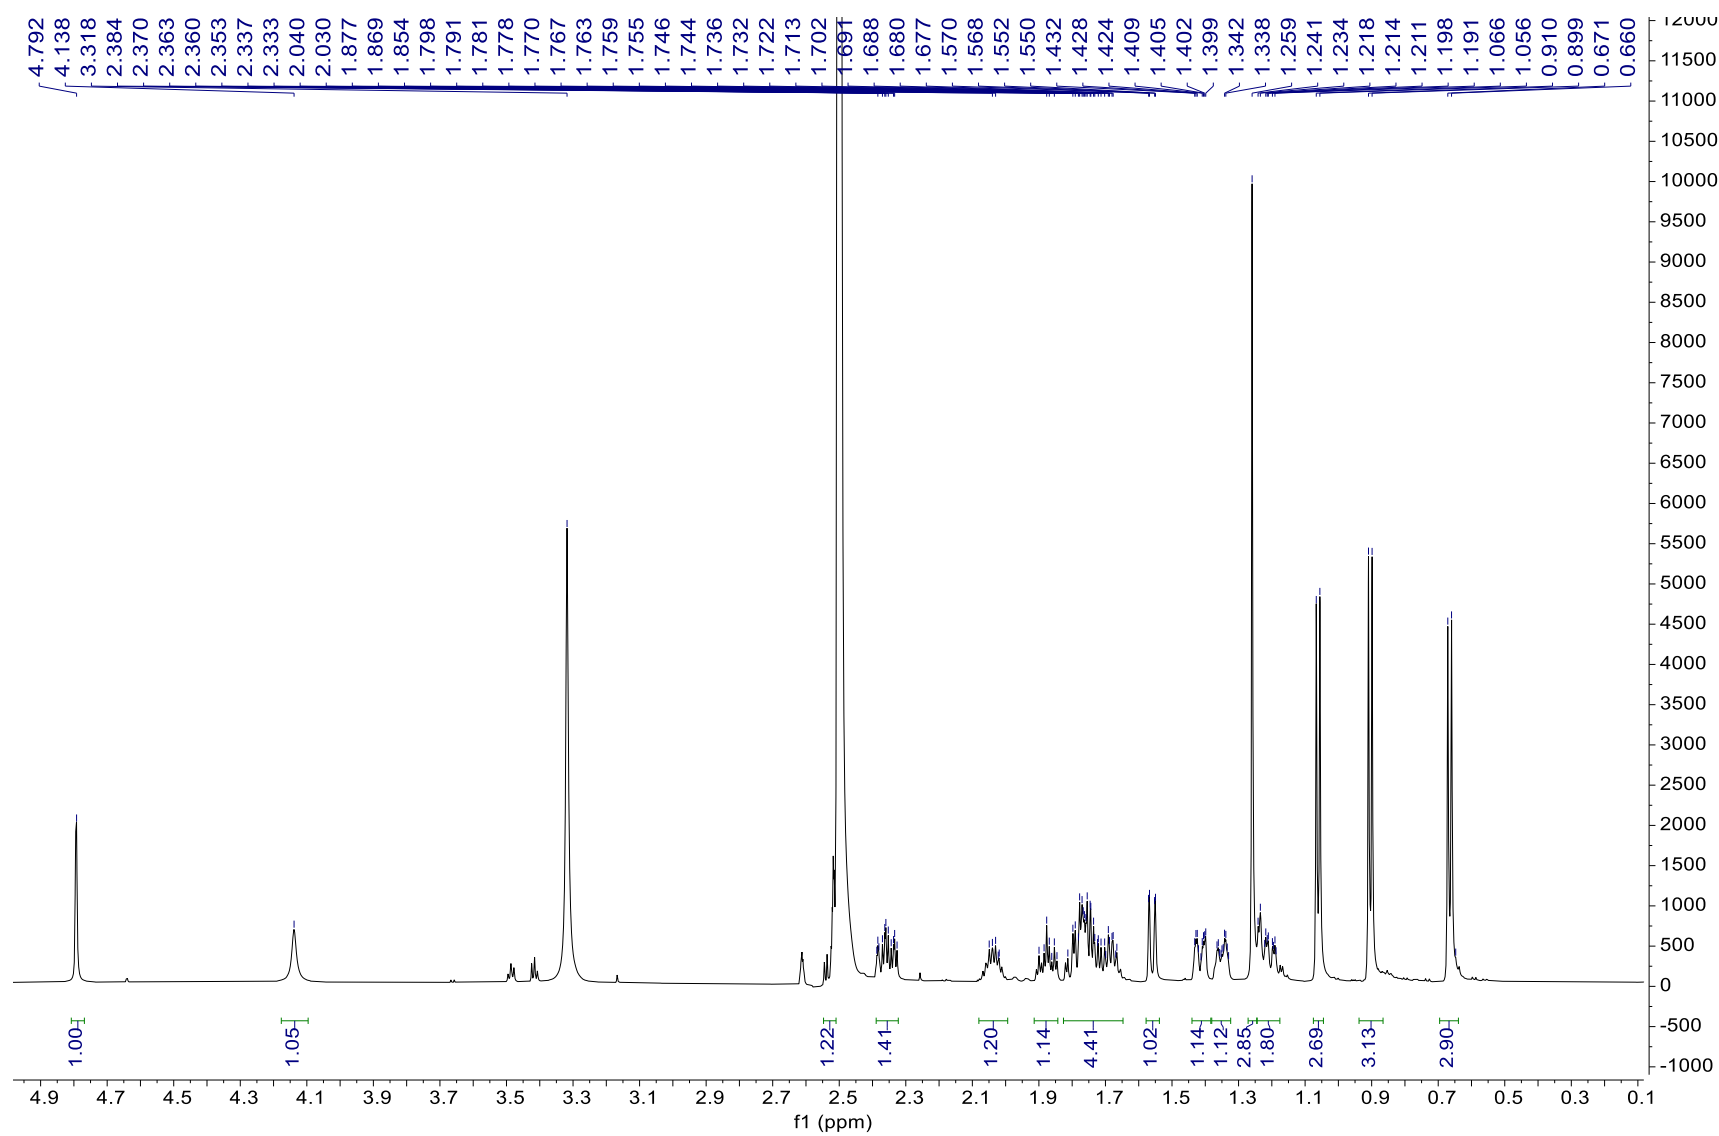

Figure S10. <sup>1</sup>H NMR data of **1** in DMSO-*d*<sub>6</sub> (expanded)

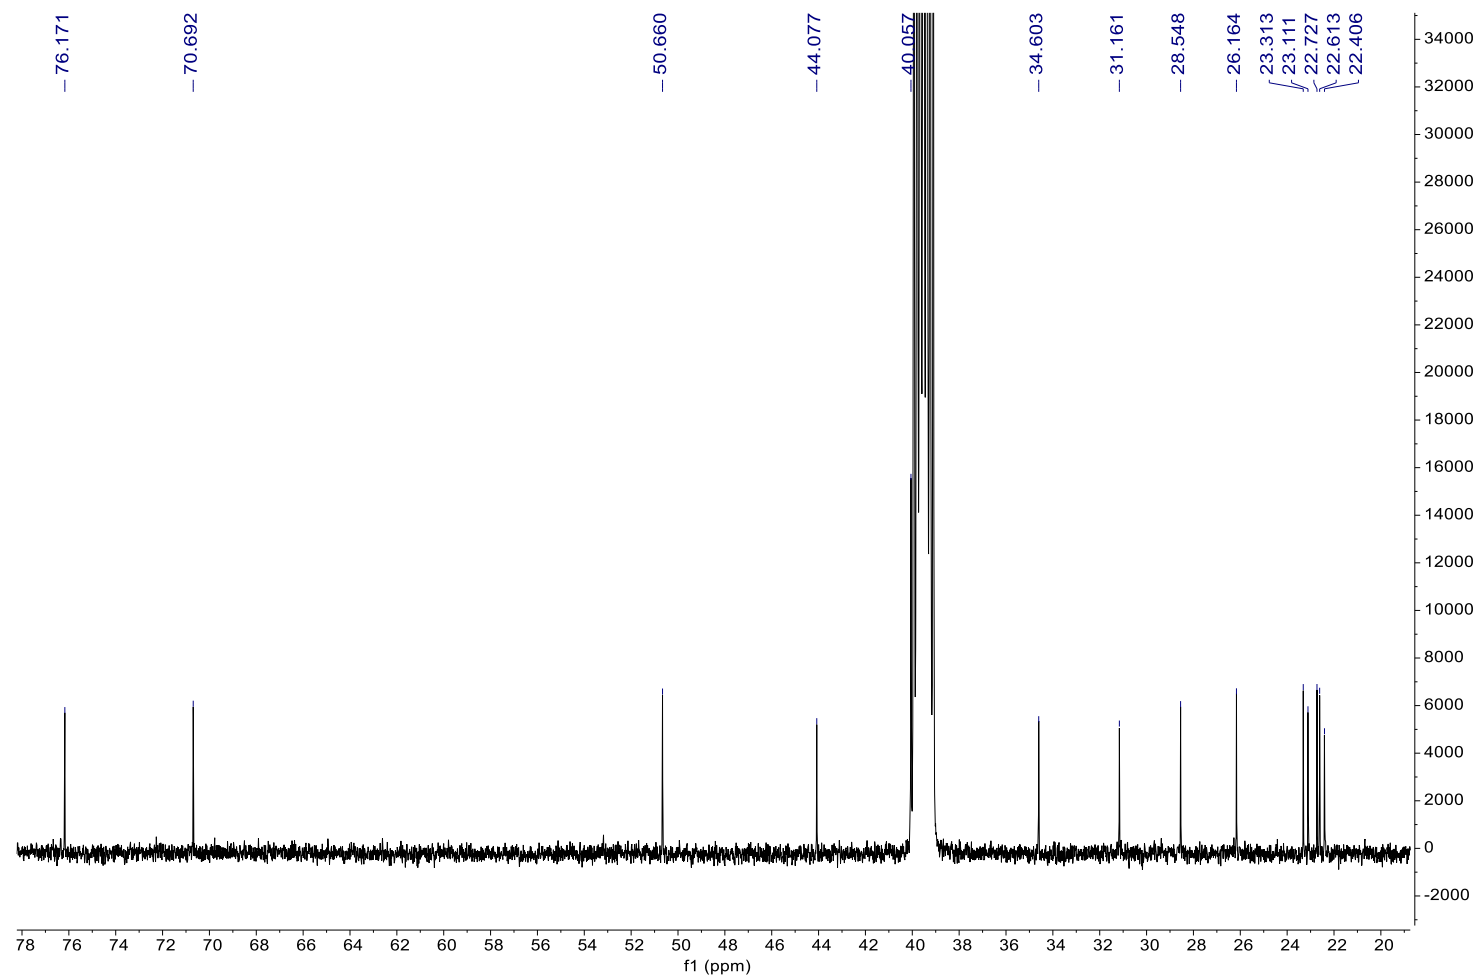

Figure S11.  $^{13}\text{C}$  NMR data of **1** in  $\text{DMSO}-d_6$

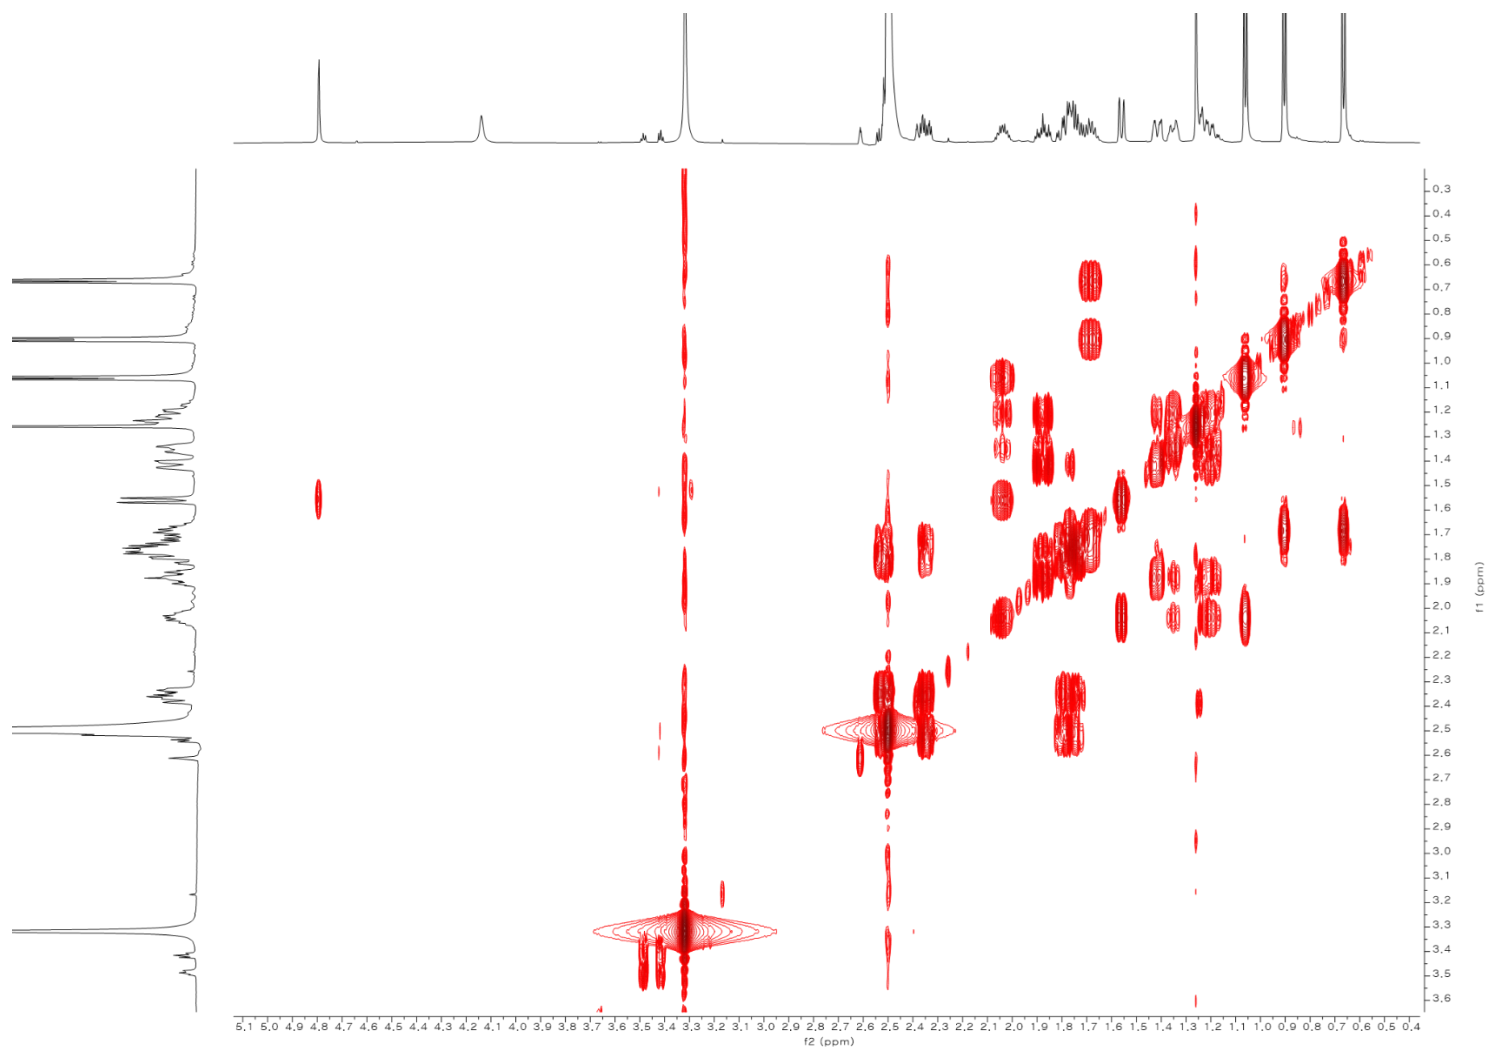

Figure S12. COSY spectrum of **1** in DMSO-*d*<sub>6</sub>

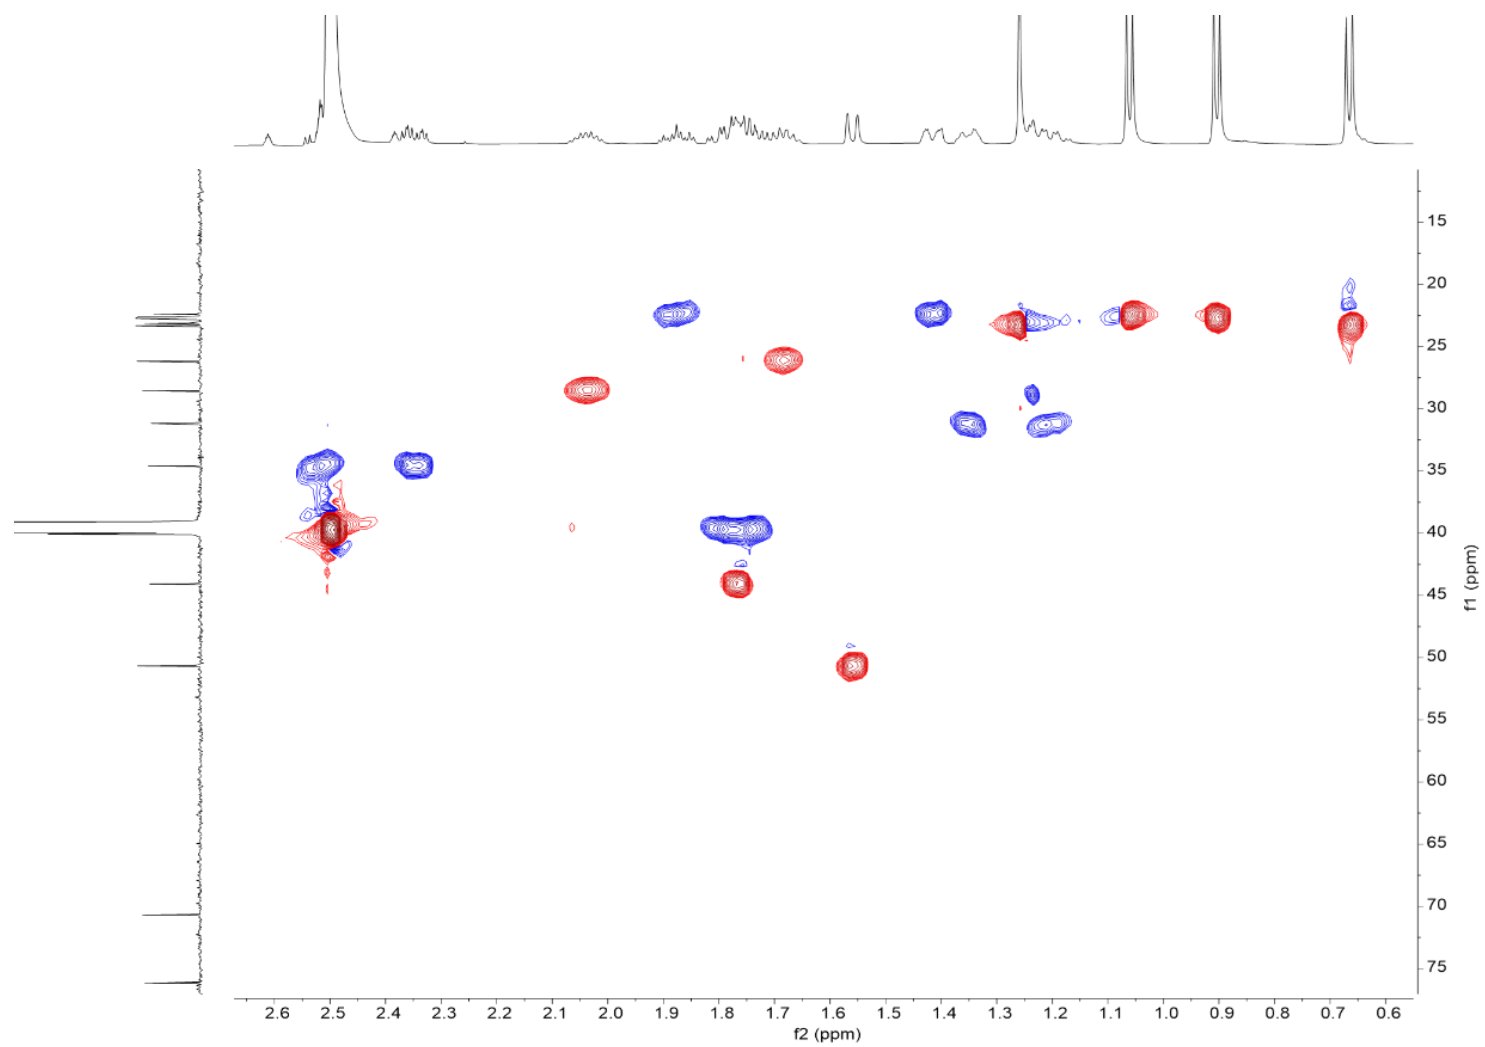

Figure S13. HSQC spectrum of **1** in DMSO- $d_6$



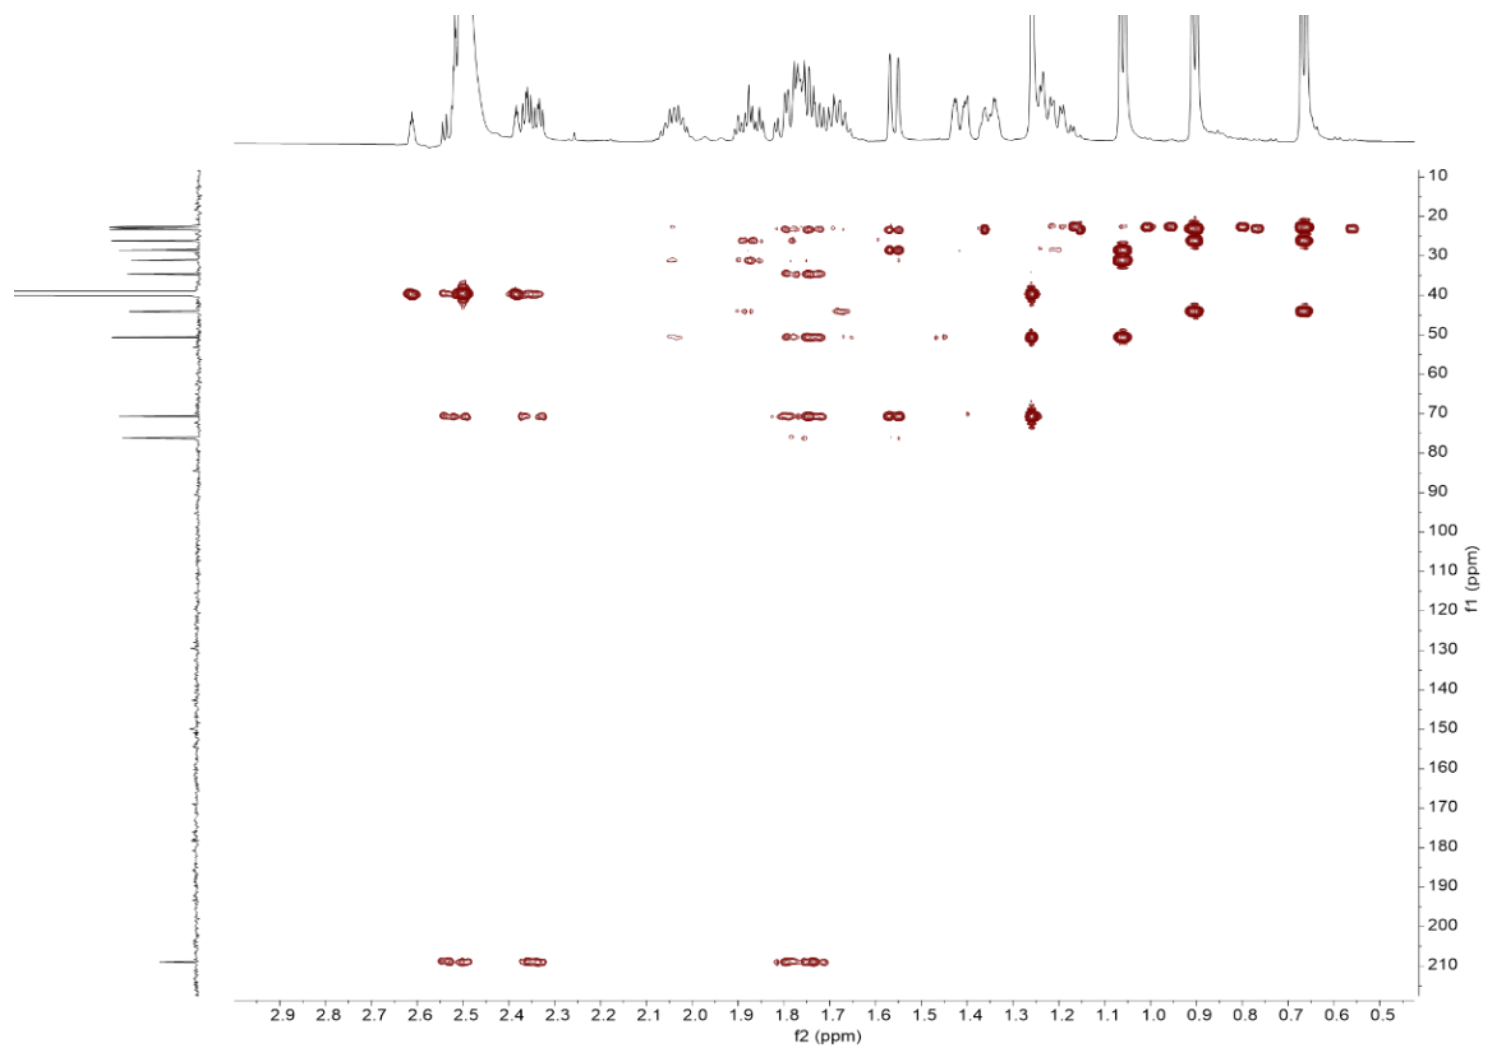

Figure S14. HMBC spectrum of 1 in DMSO- $d_6$

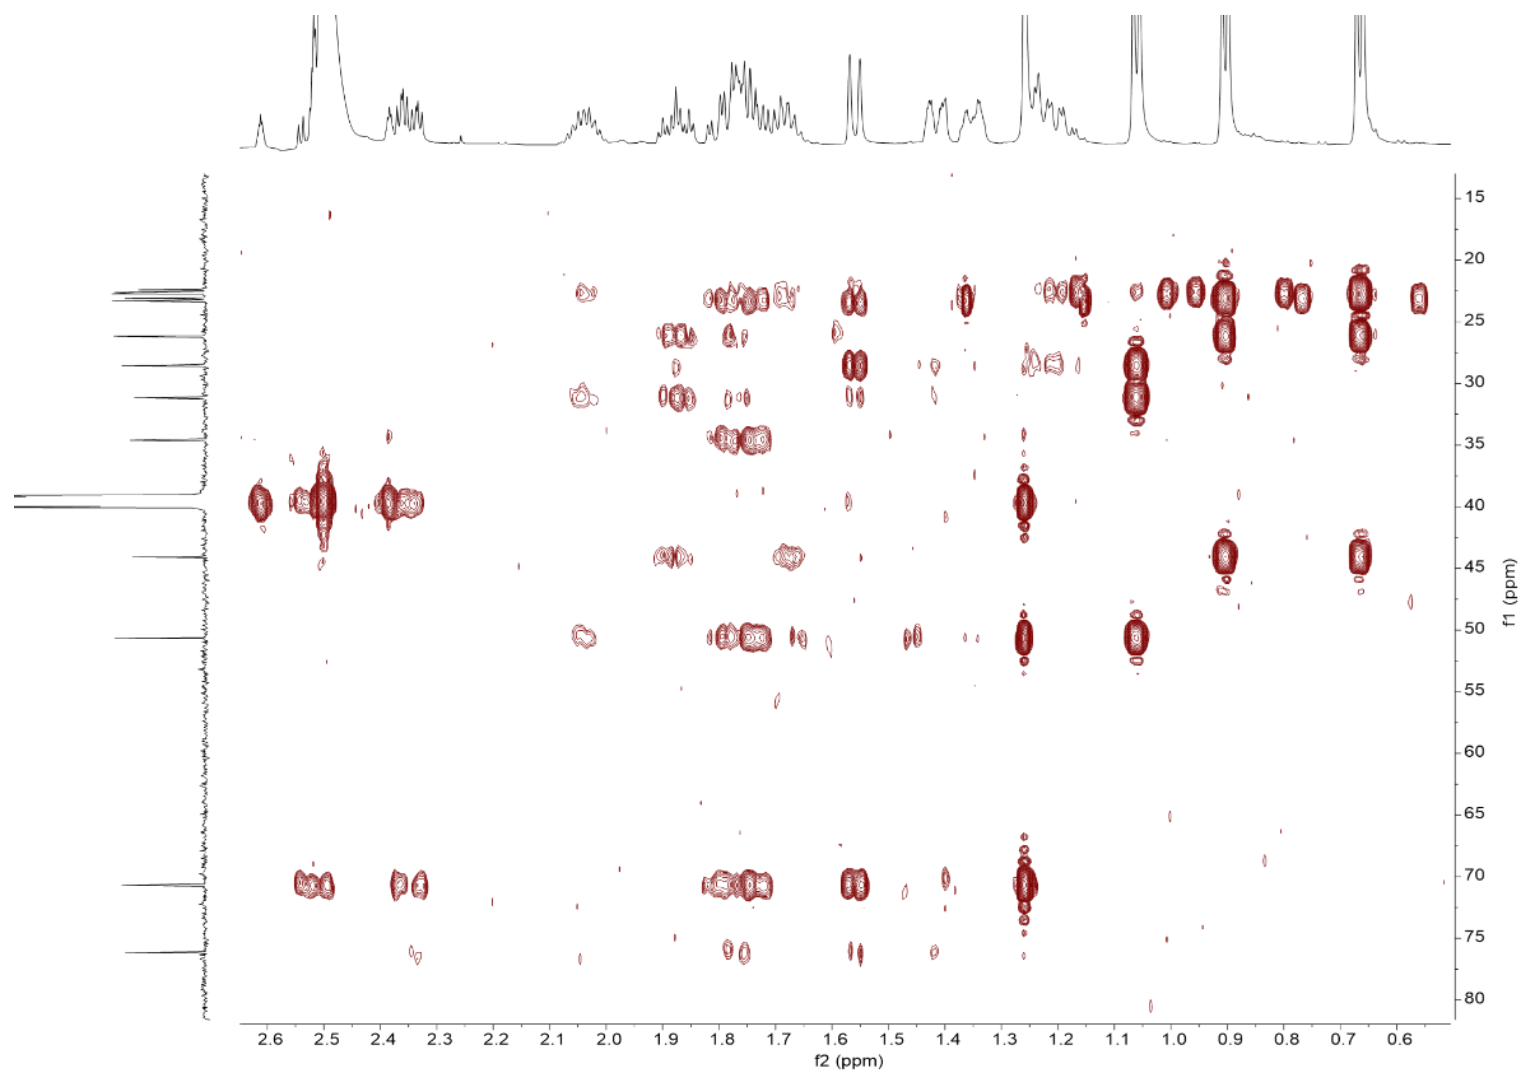

Figure S15. HMBC spectrum of 1 in DMSO-*d*<sub>6</sub> (expanded)

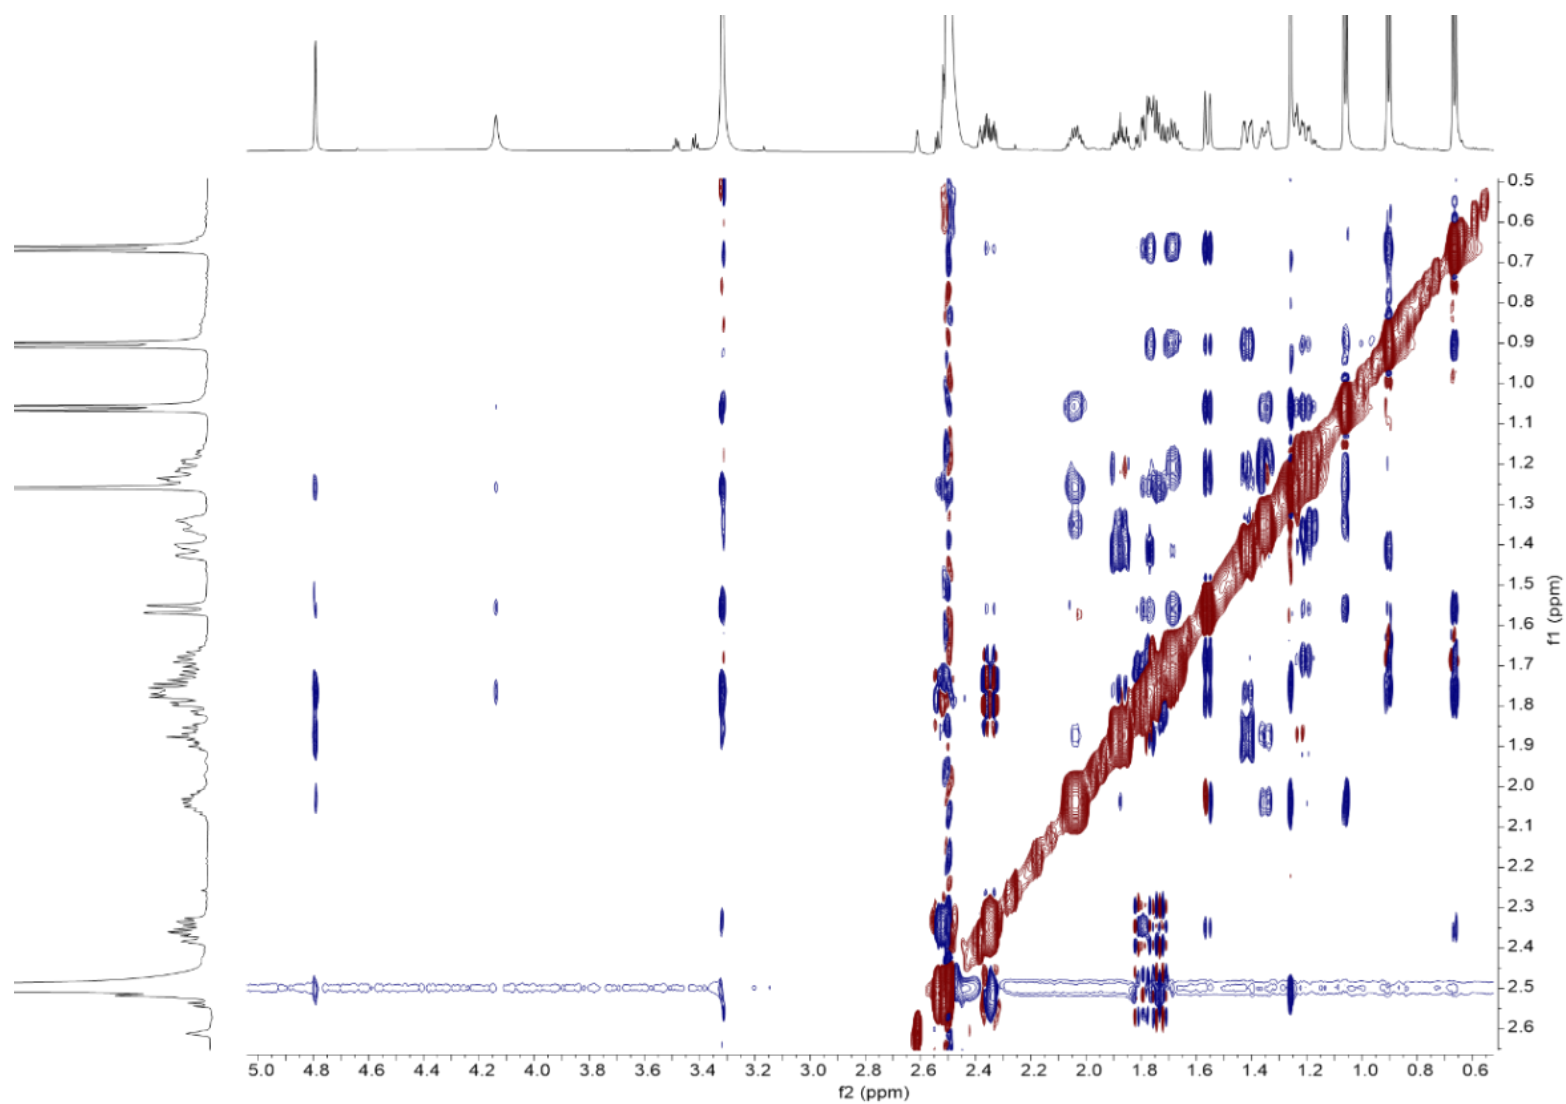

Figure S16. NOESY spectrum of **1** in DMSO- $d_6$

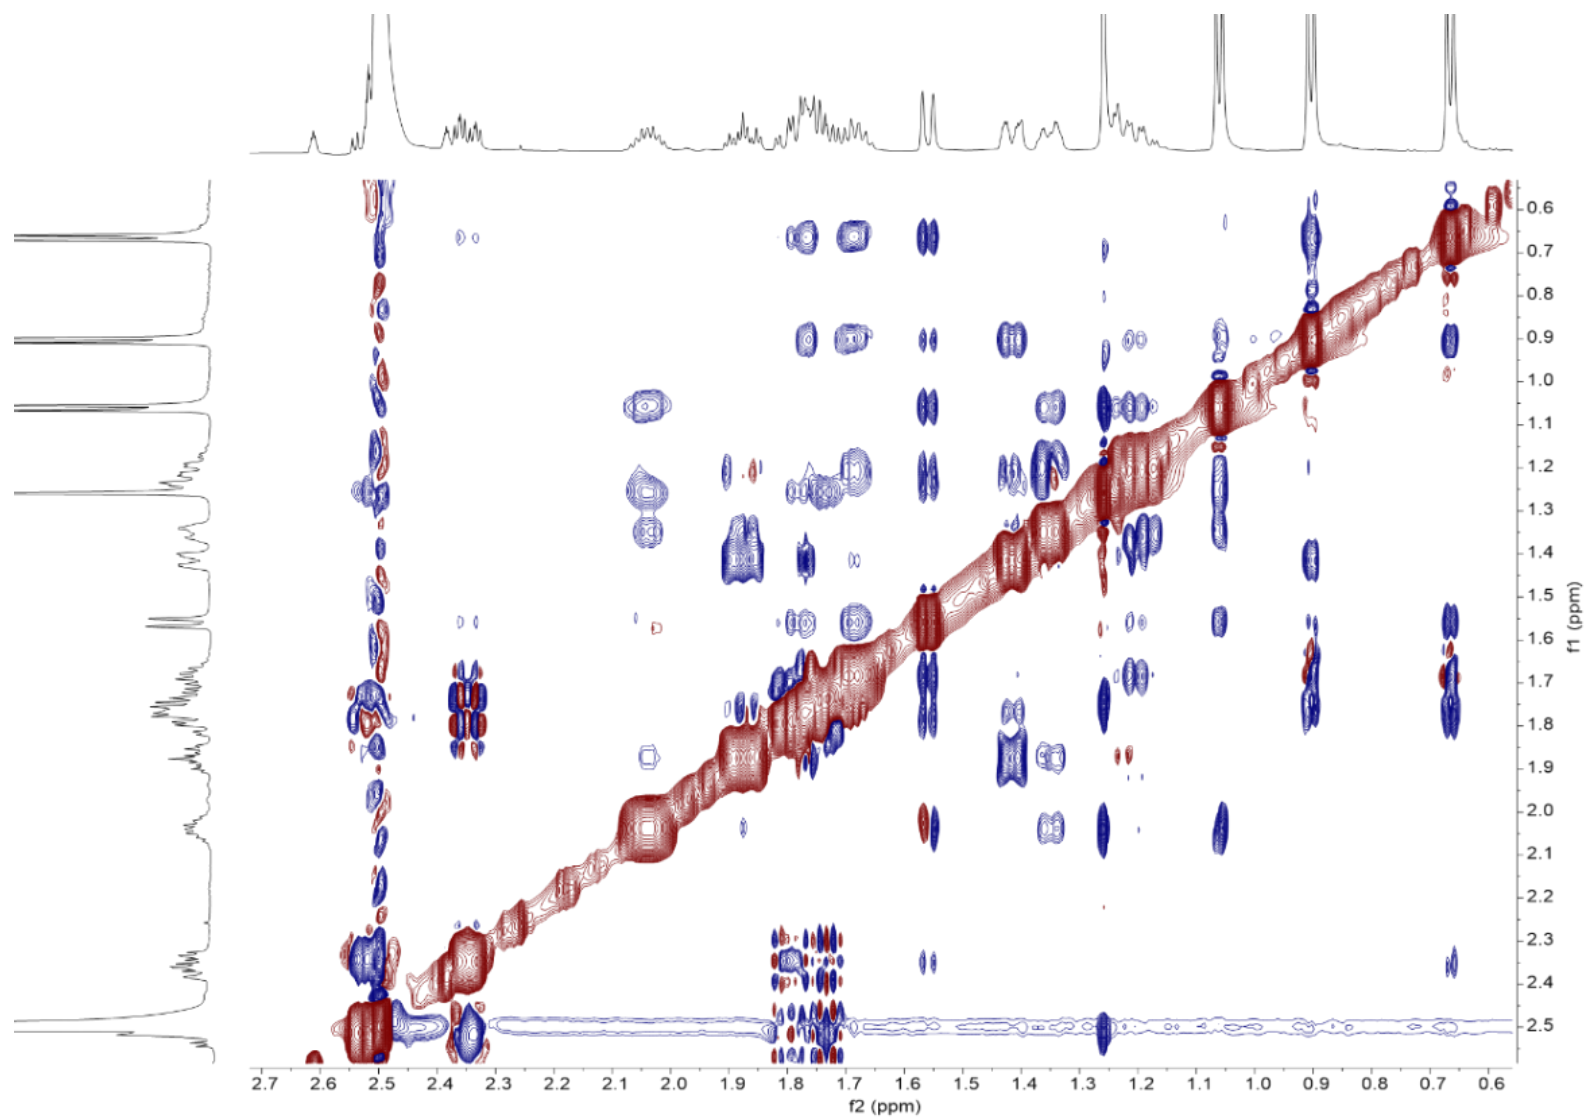

Figure S17. NOESY spectrum of **1** in DMSO-*d*<sub>6</sub> (expanded)

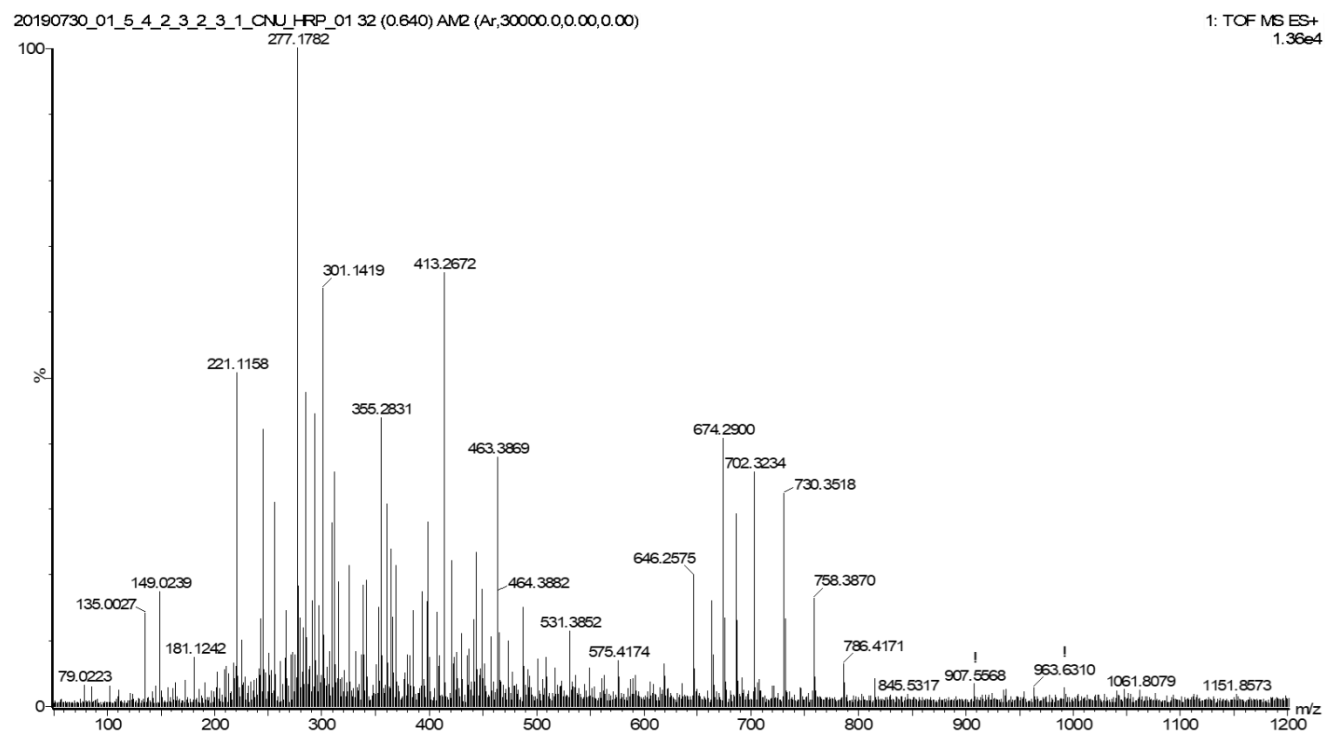

Figure S18. HRESIMS of **2**



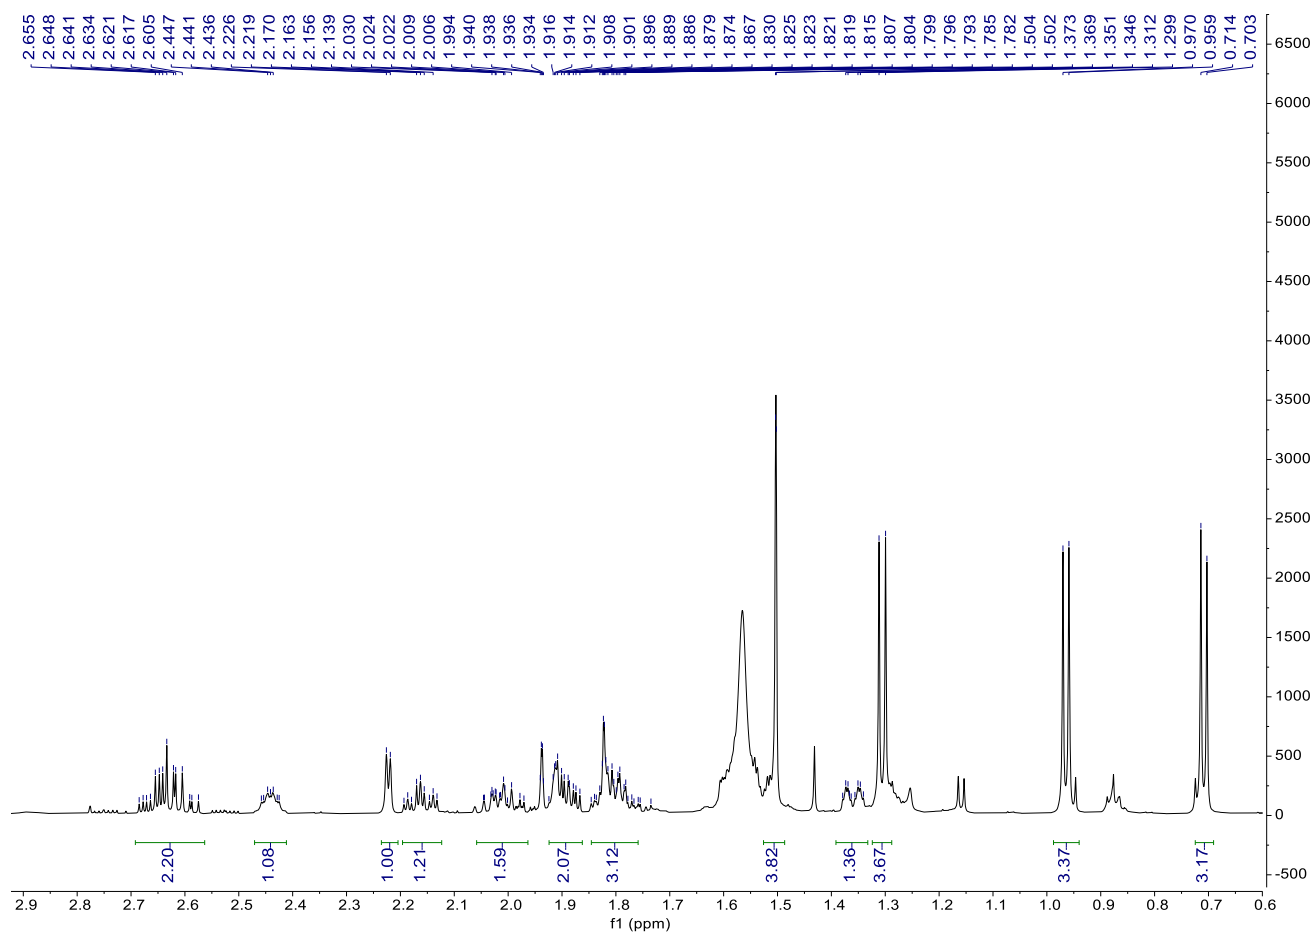

Figure S20.  $^1\text{H}$  NMR data of **2** in  $\text{CDCl}_3$  (expanded)

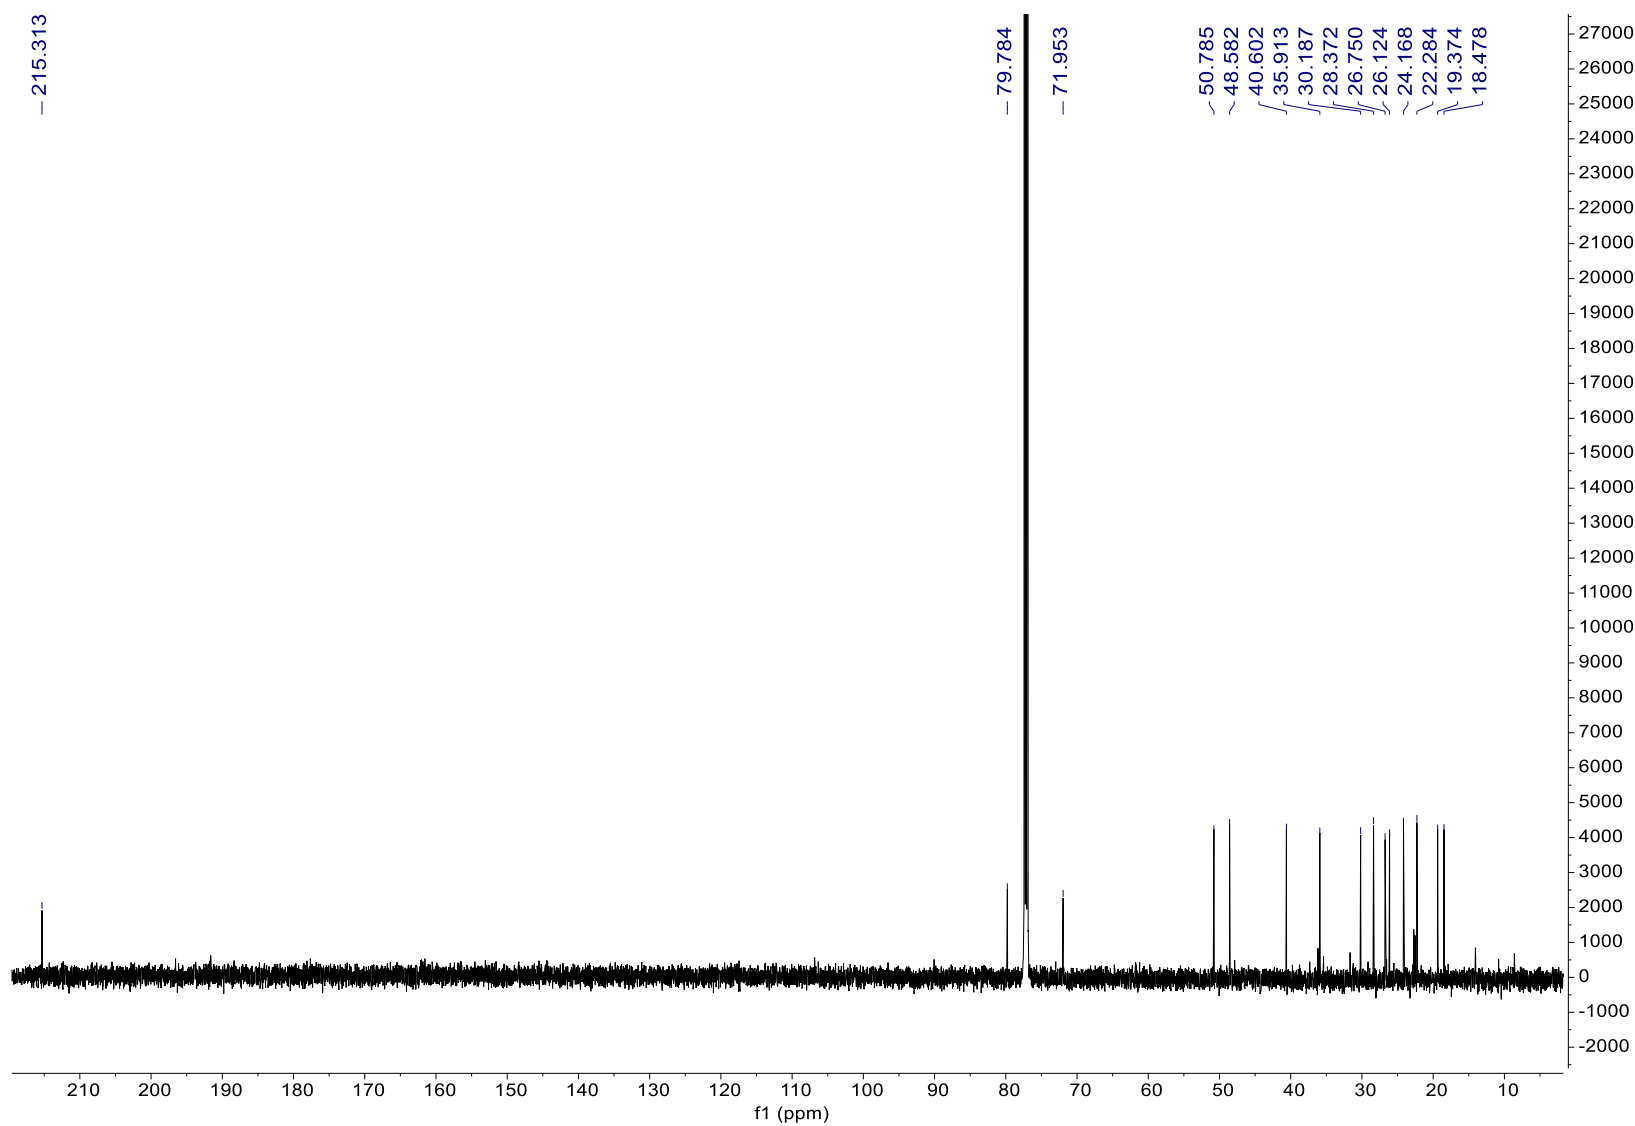

Figure S21. <sup>13</sup>C NMR data of **2** in CDCl<sub>3</sub>



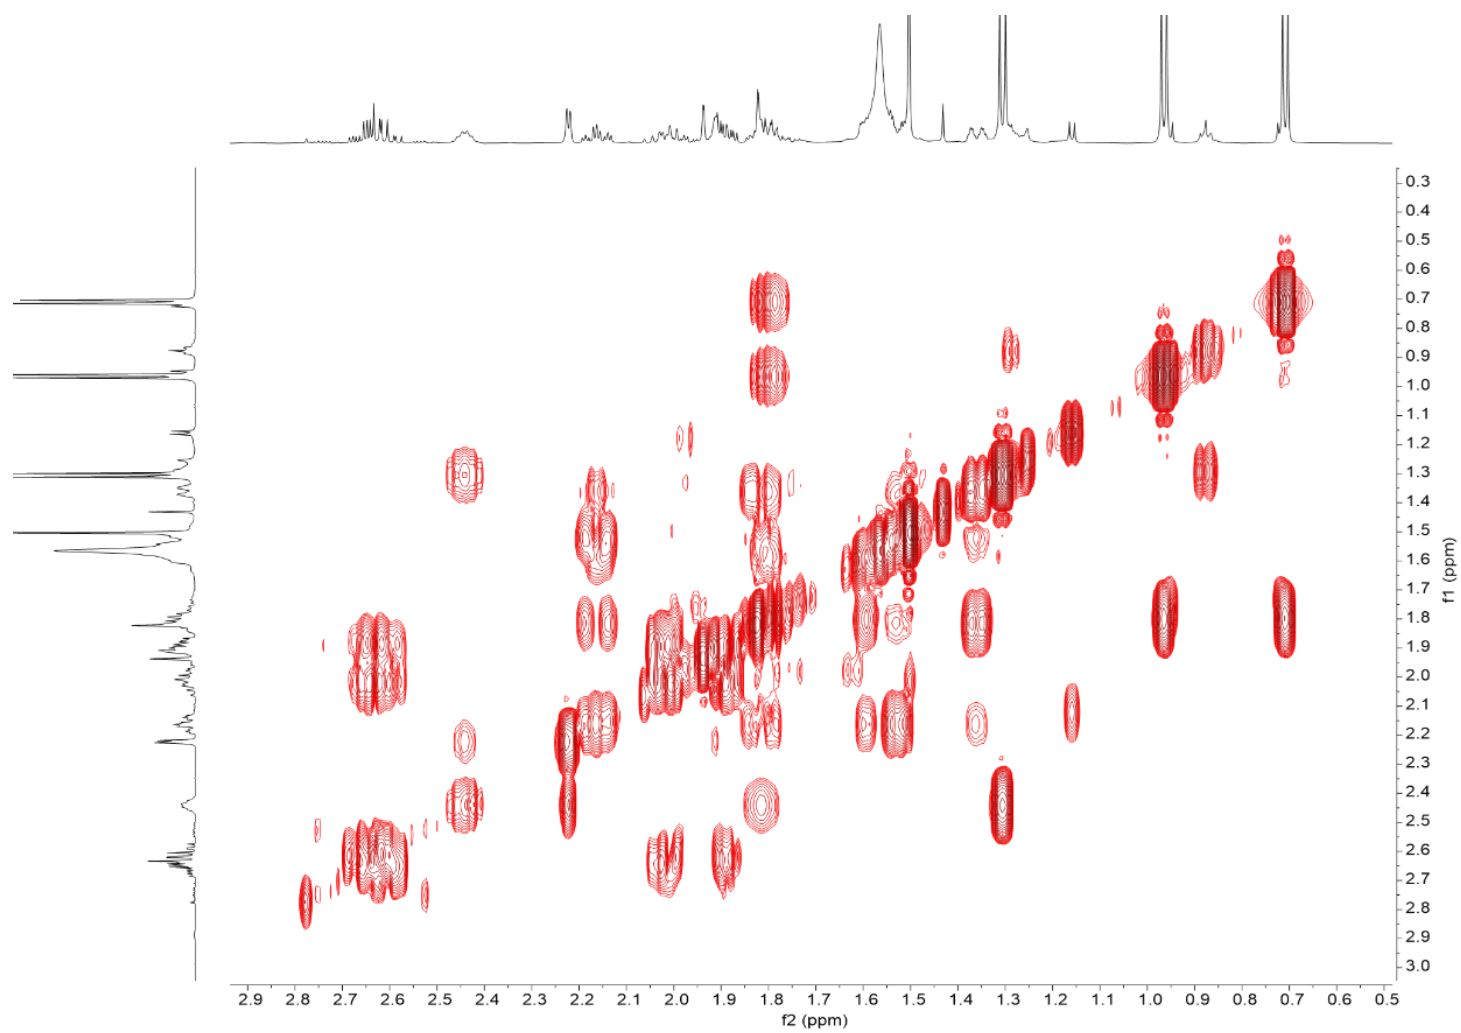

Figure S22. COSY spectrum of **2** in CDCl<sub>3</sub>

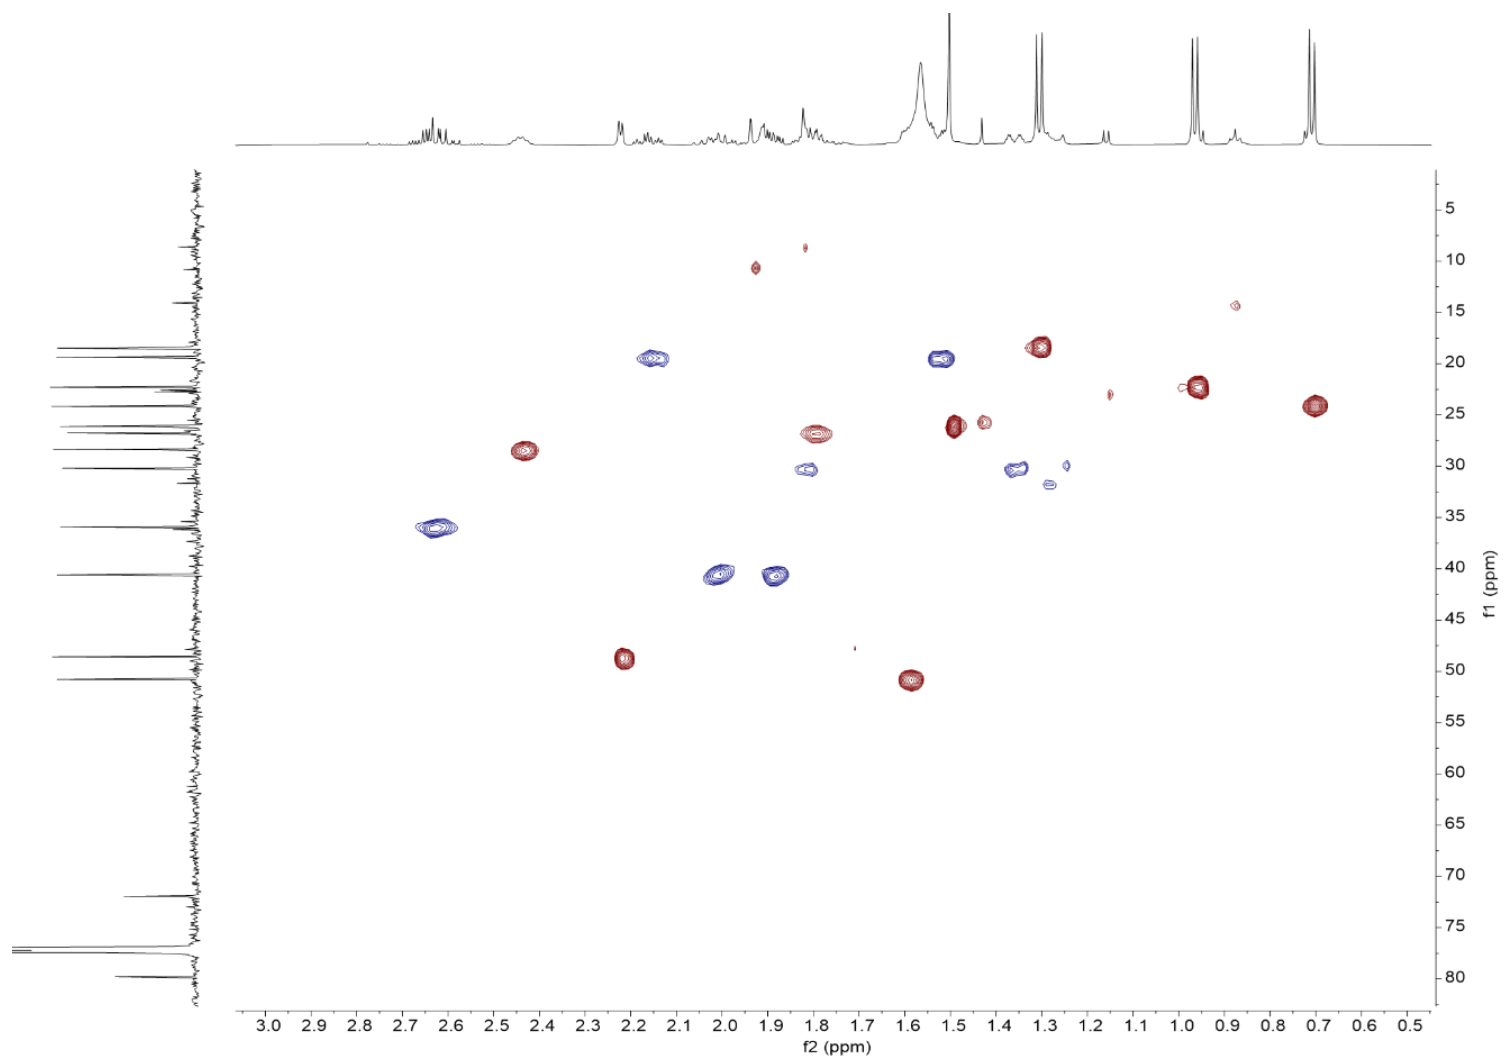

Figure S23. HSQC spectrum of **2** in CDCl<sub>3</sub>

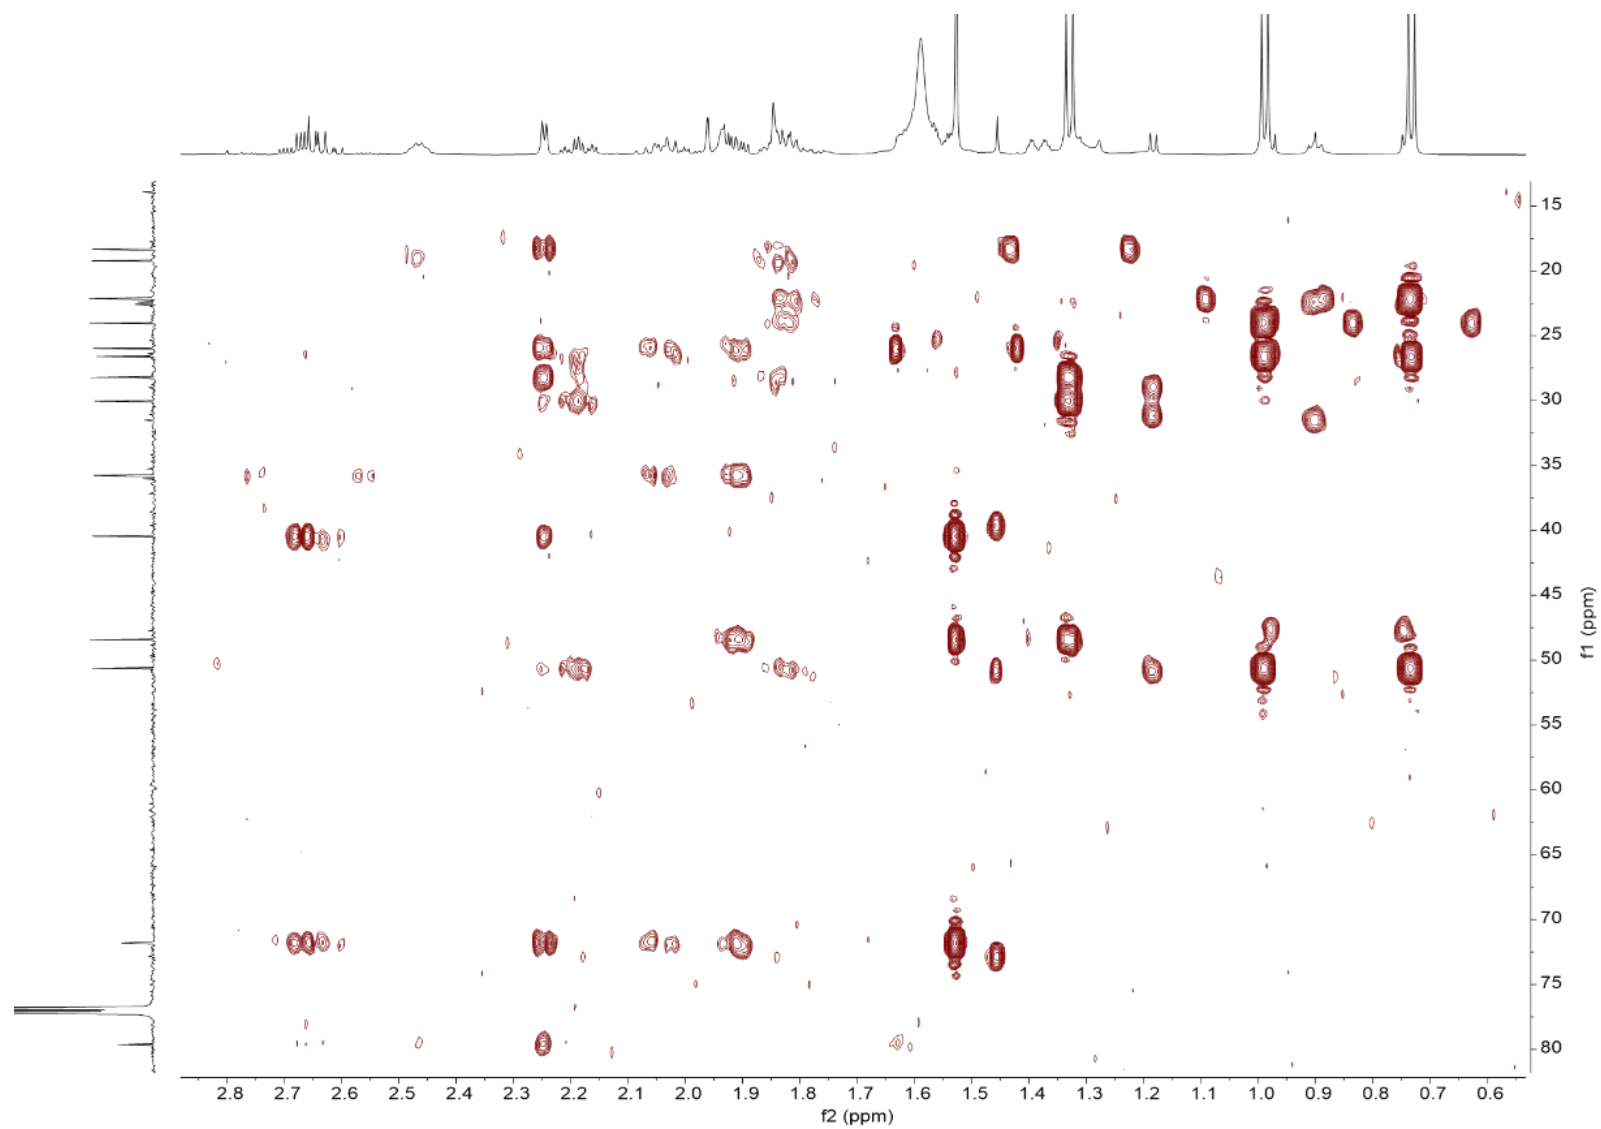

Figure S24. HMBC spectrum of **2** in  $\text{CDCl}_3$  (expanded - 1)

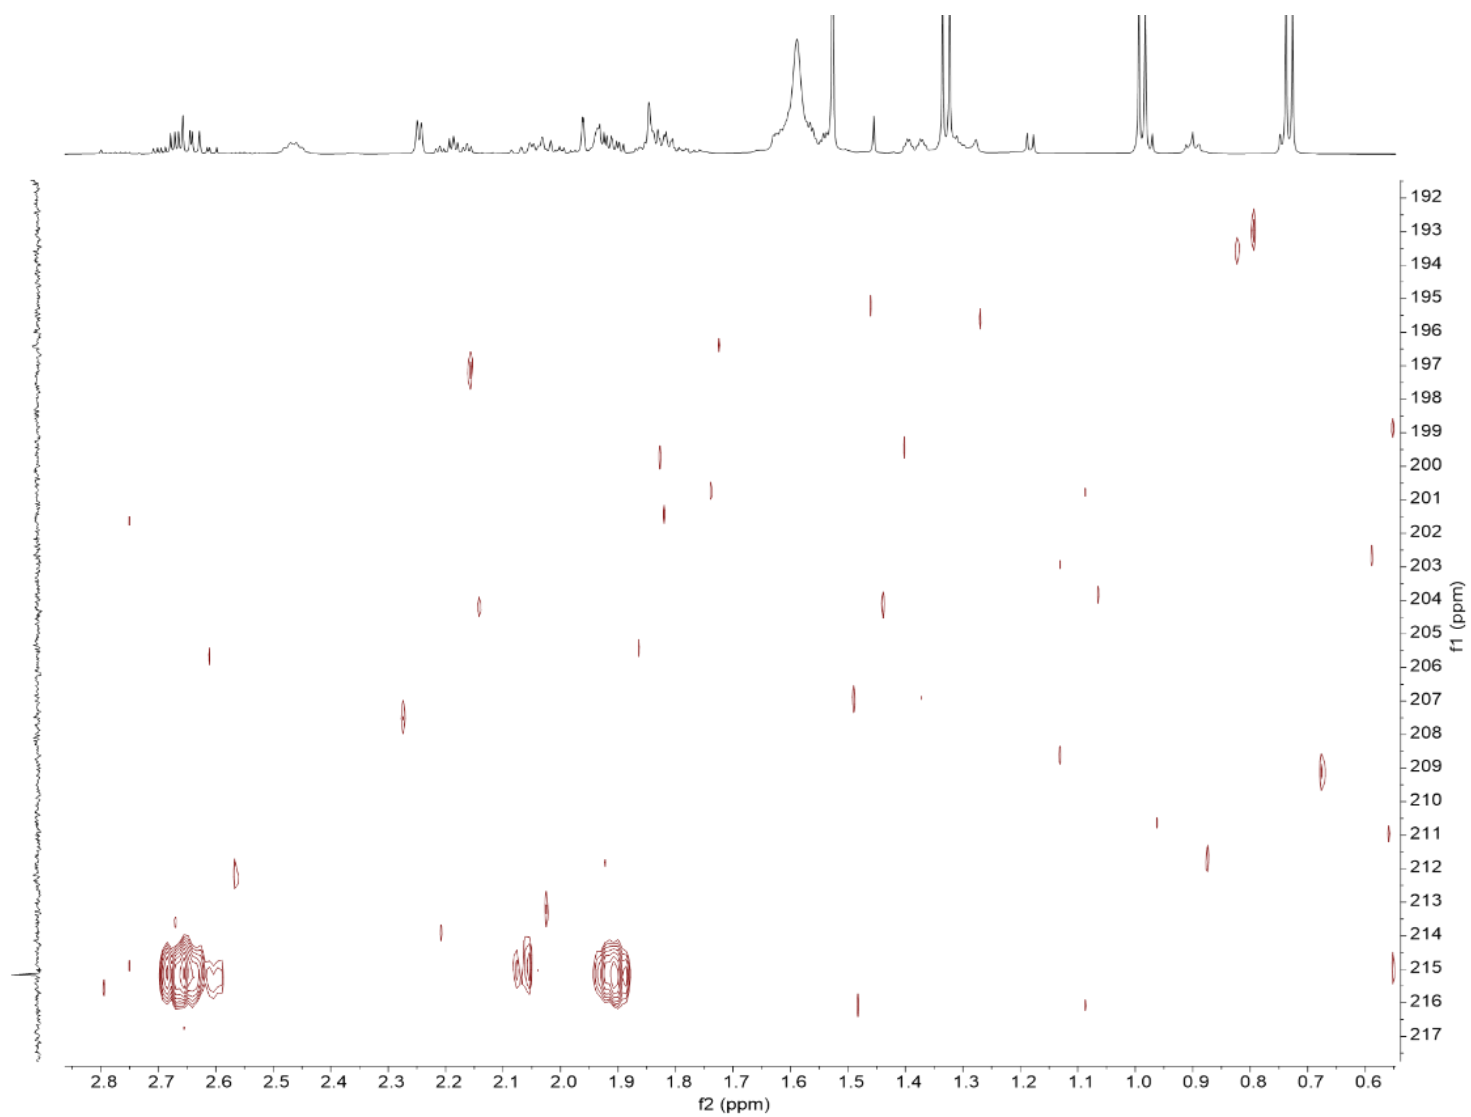

Figure S25. HMBC spectrum of **2** in CDCl<sub>3</sub> (expanded - 2)

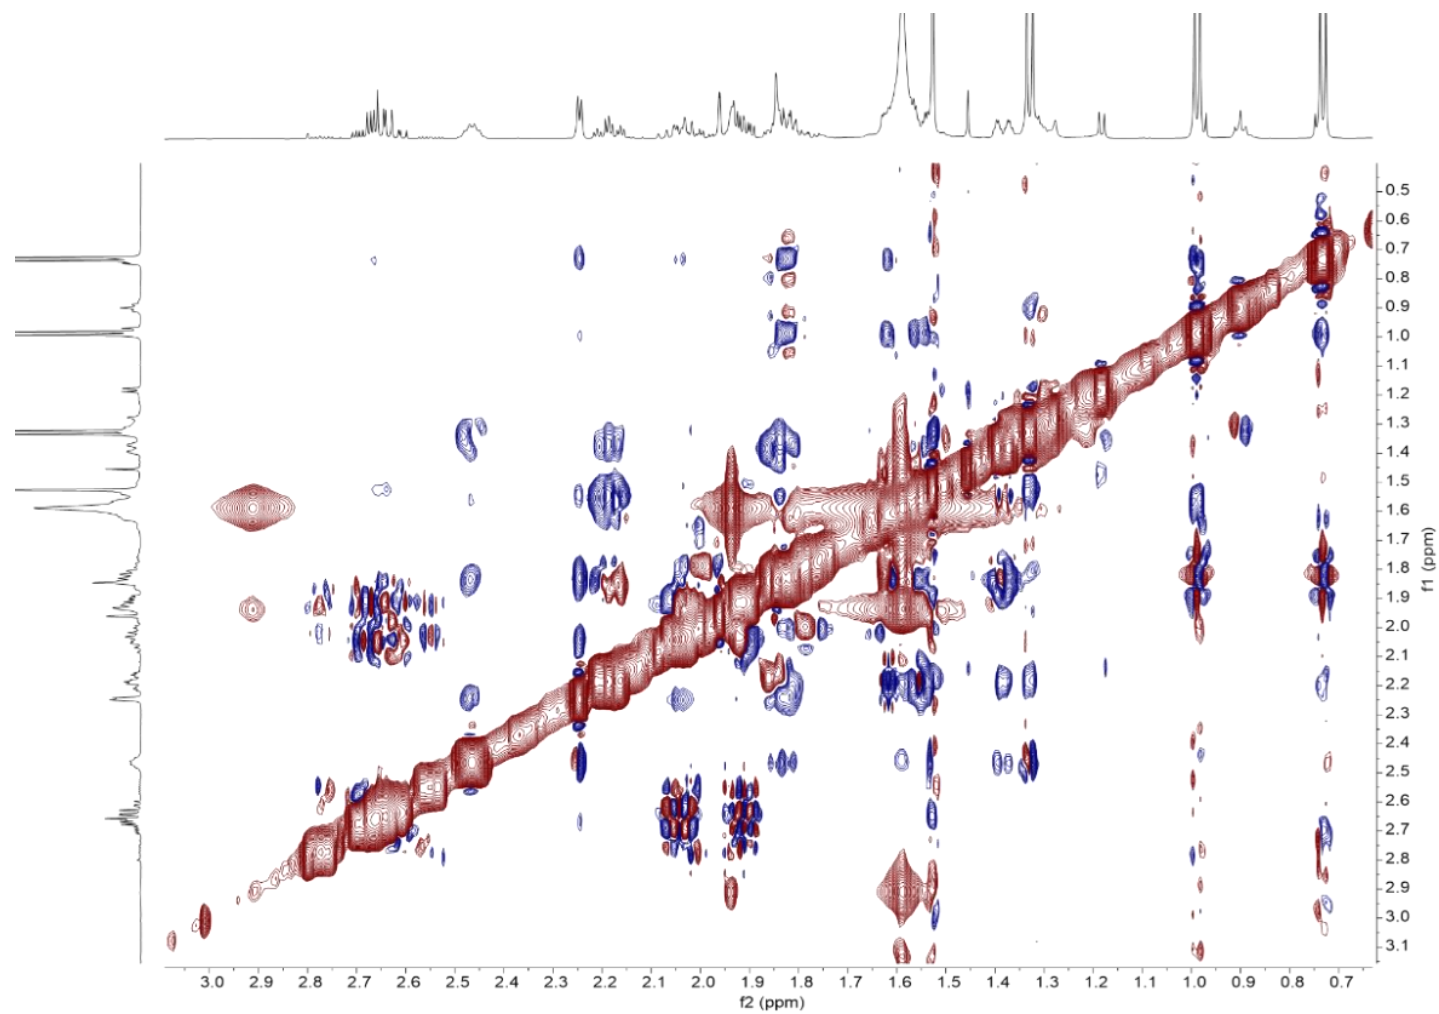

Figure S26. NOESY spectrum of **2** in CDCl<sub>3</sub>

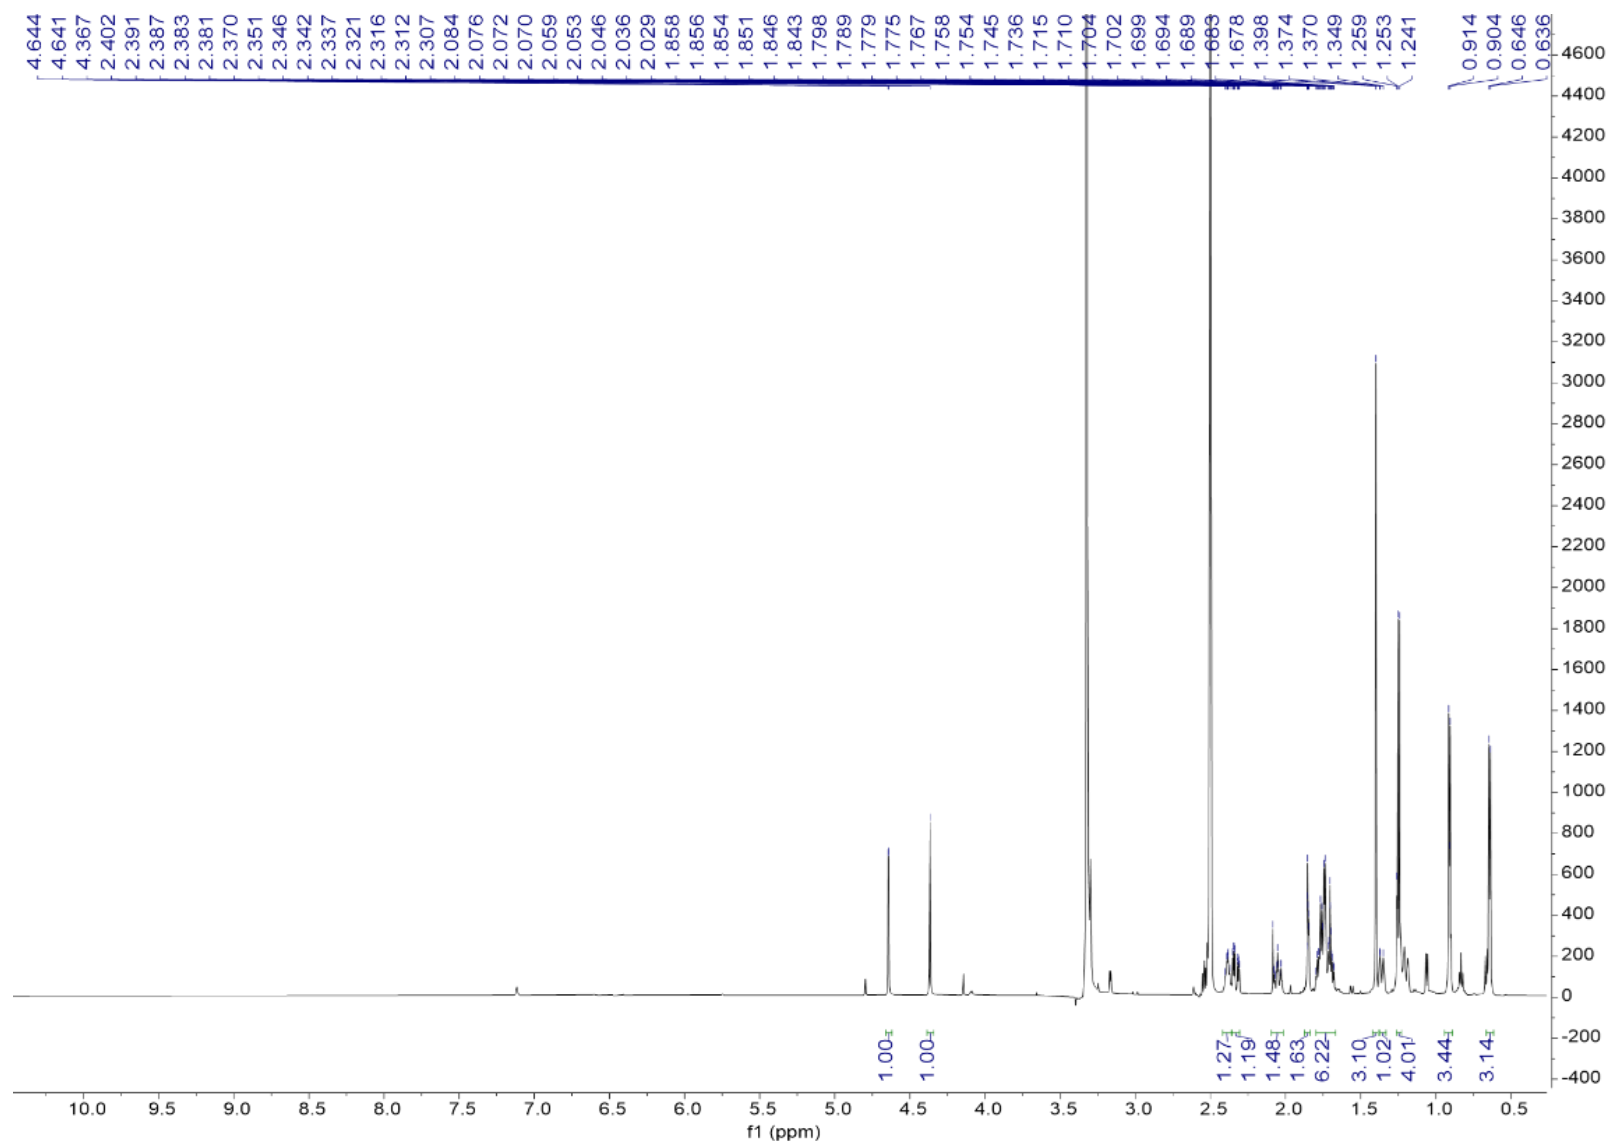

Figure S27.  $^1\text{H}$  NMR spectrum of **2** in  $\text{DMSO}-d_6$

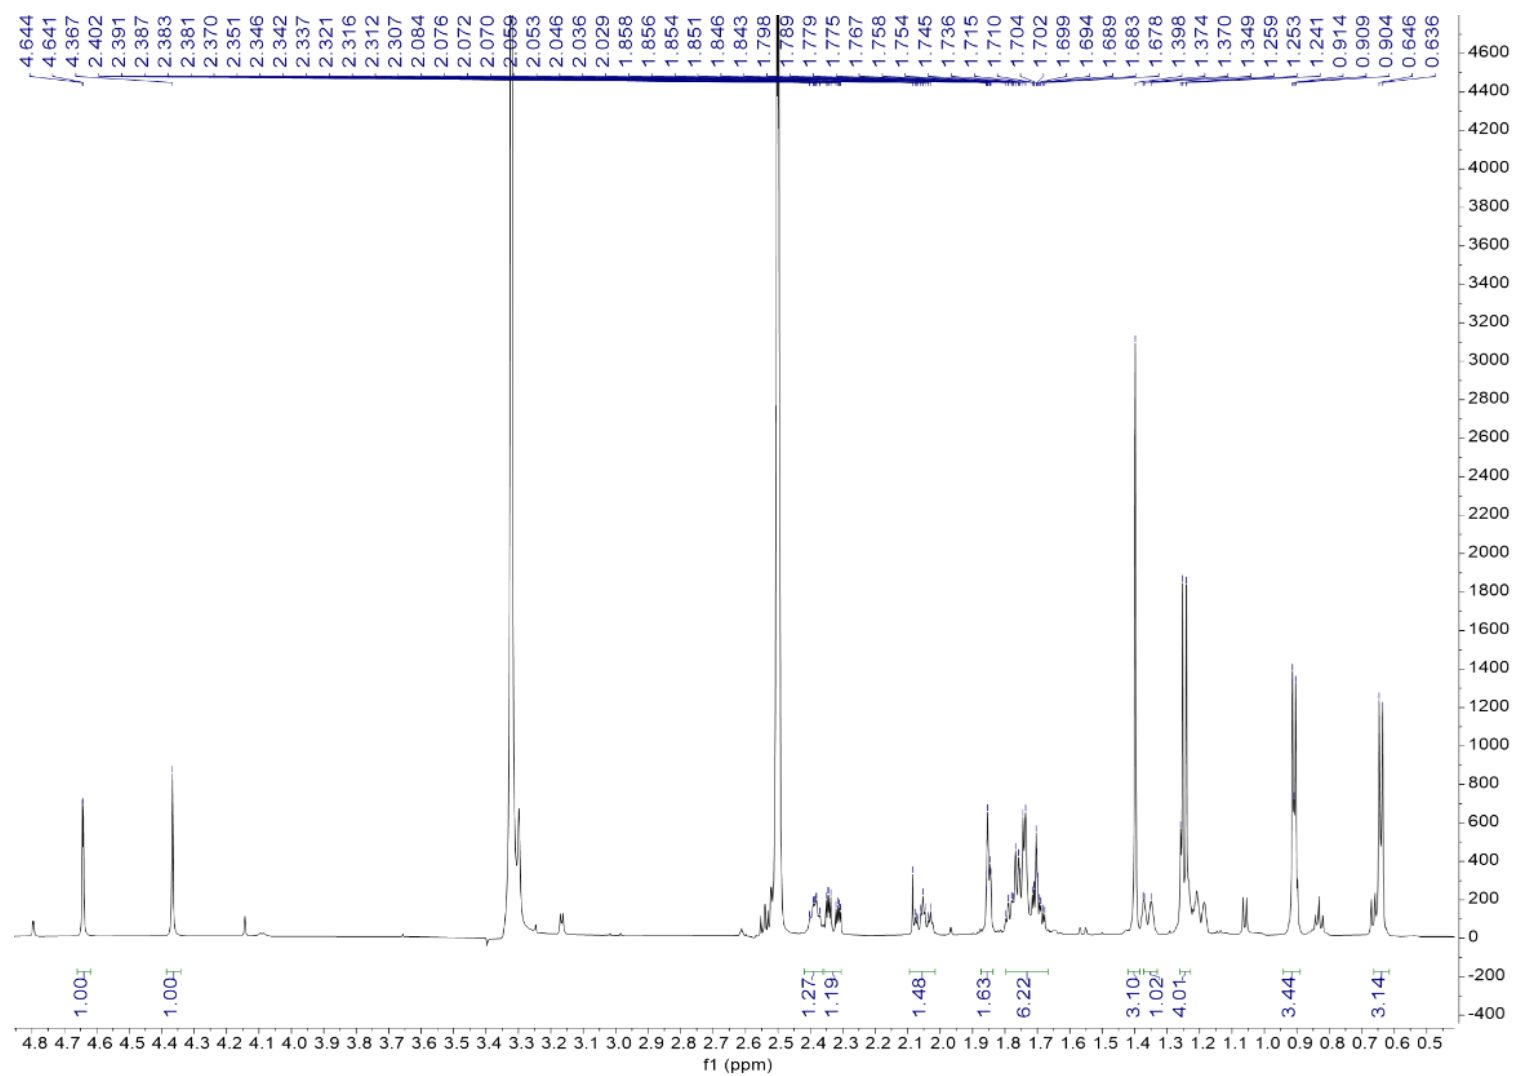

Figure S28.  $^1\text{H}$  NMR spectrum of **2** in  $\text{DMSO-}d_6$  (expanded)

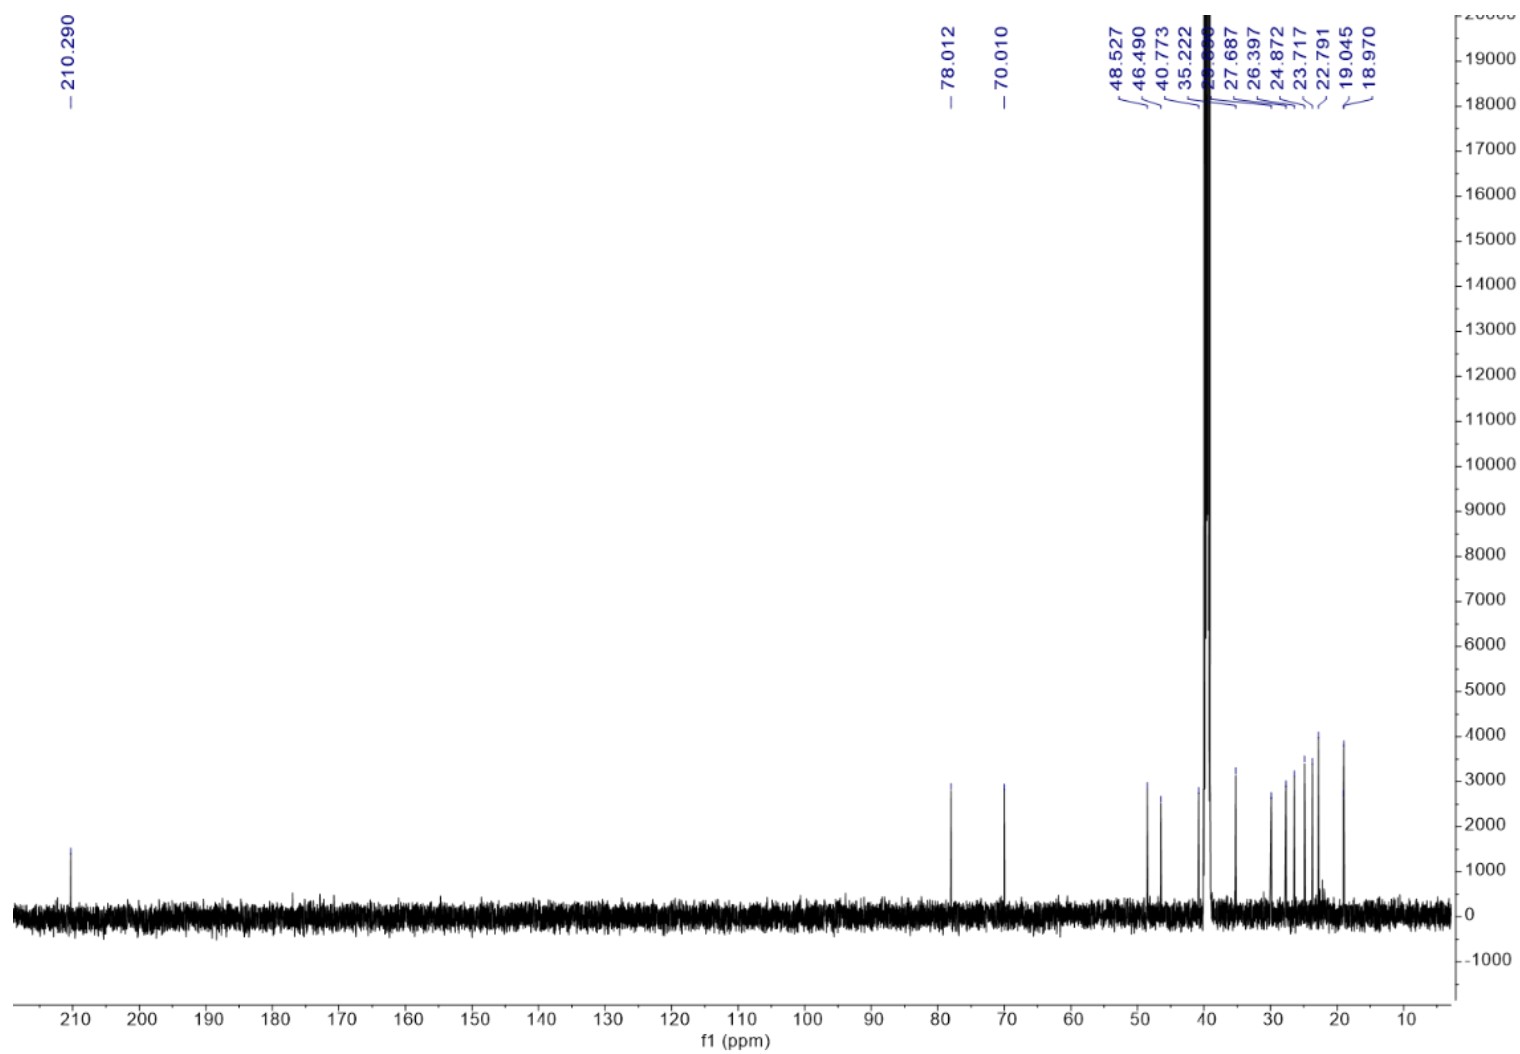

Figure S29. <sup>13</sup>C NMR spectrum of **2** in DMSO-*d*<sub>6</sub>



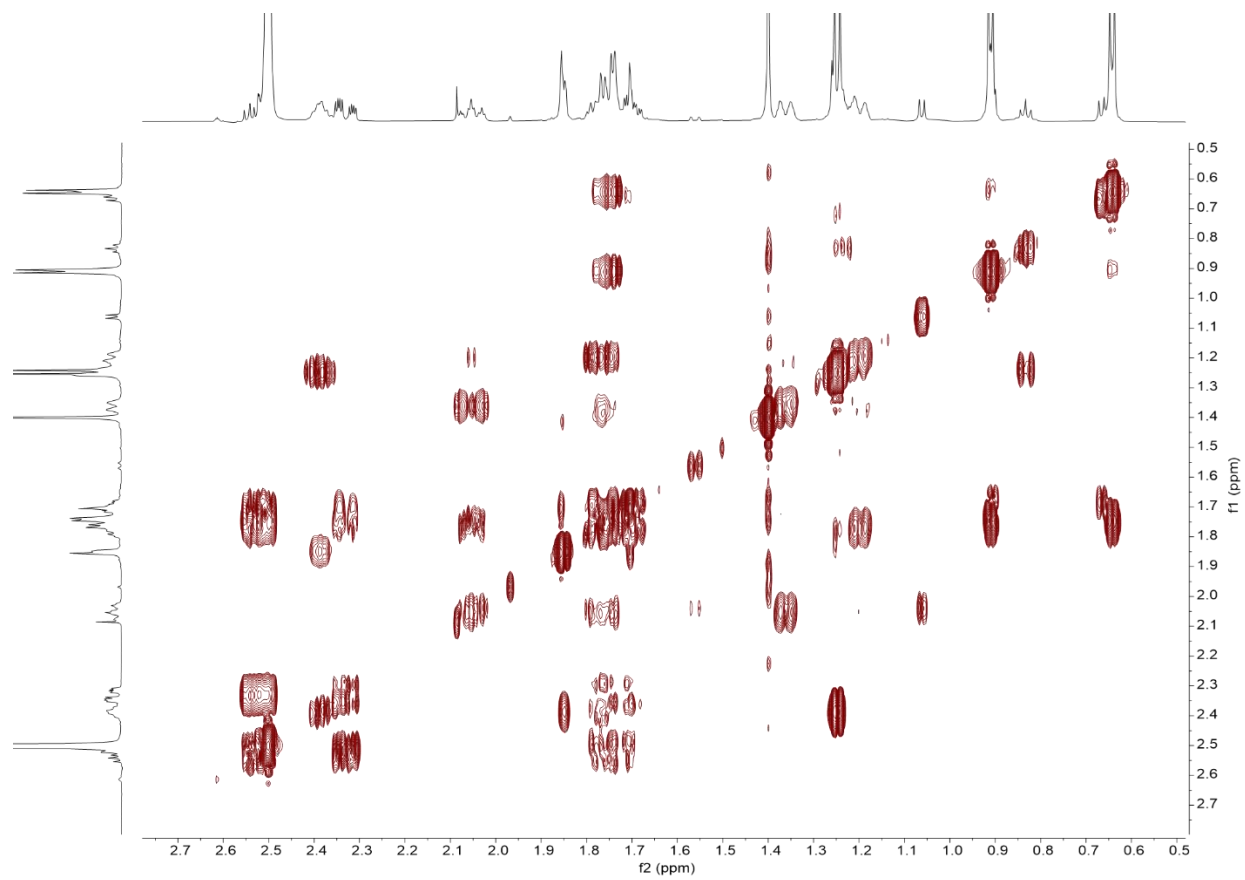

Figure S30. COSY spectrum of **2** in DMSO- $d_6$

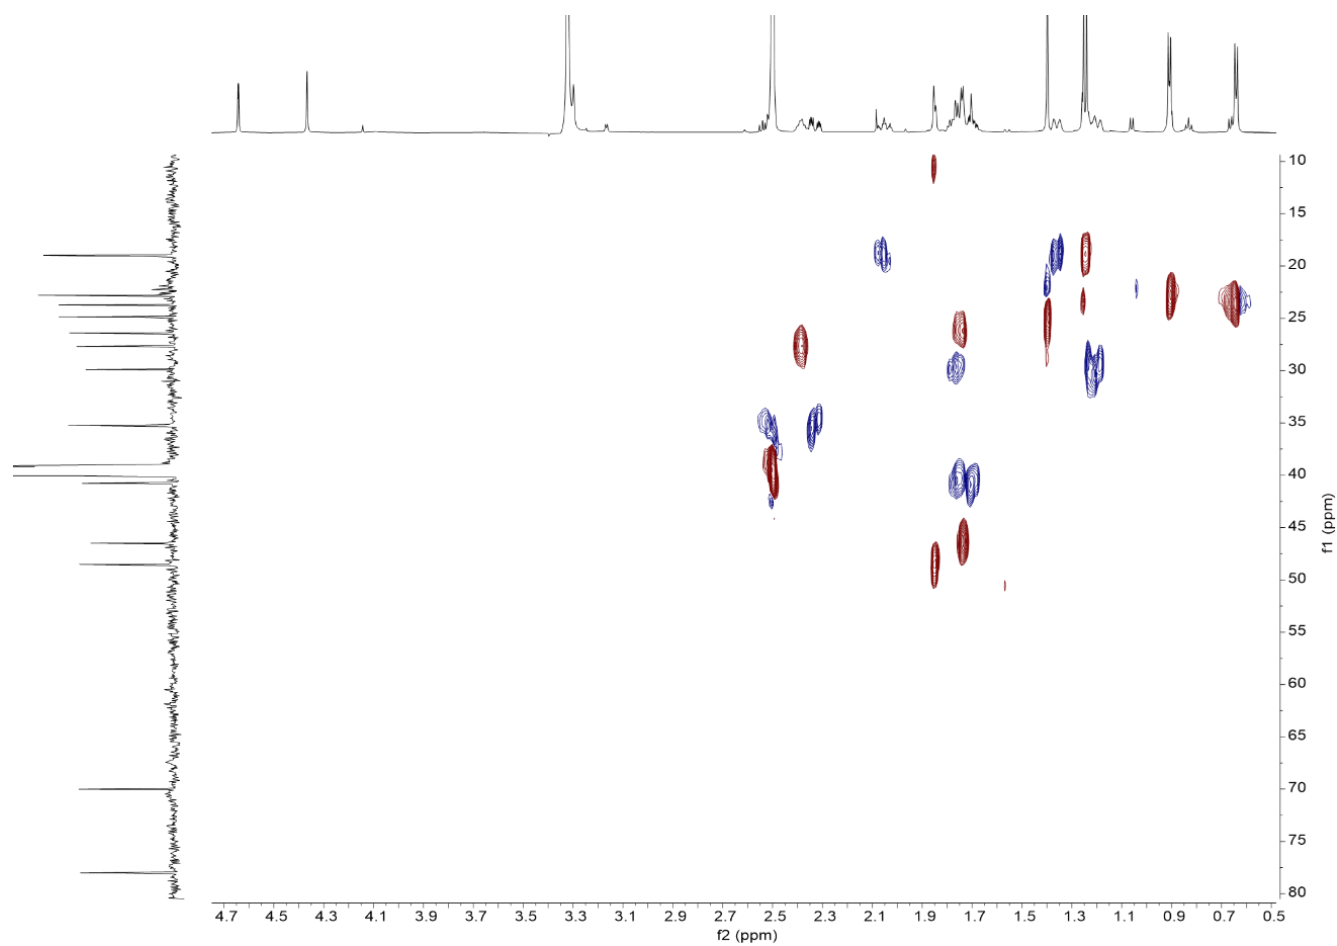

Figure S31. HSQC spectrum of **2** in  $\text{DMSO-}d_6$

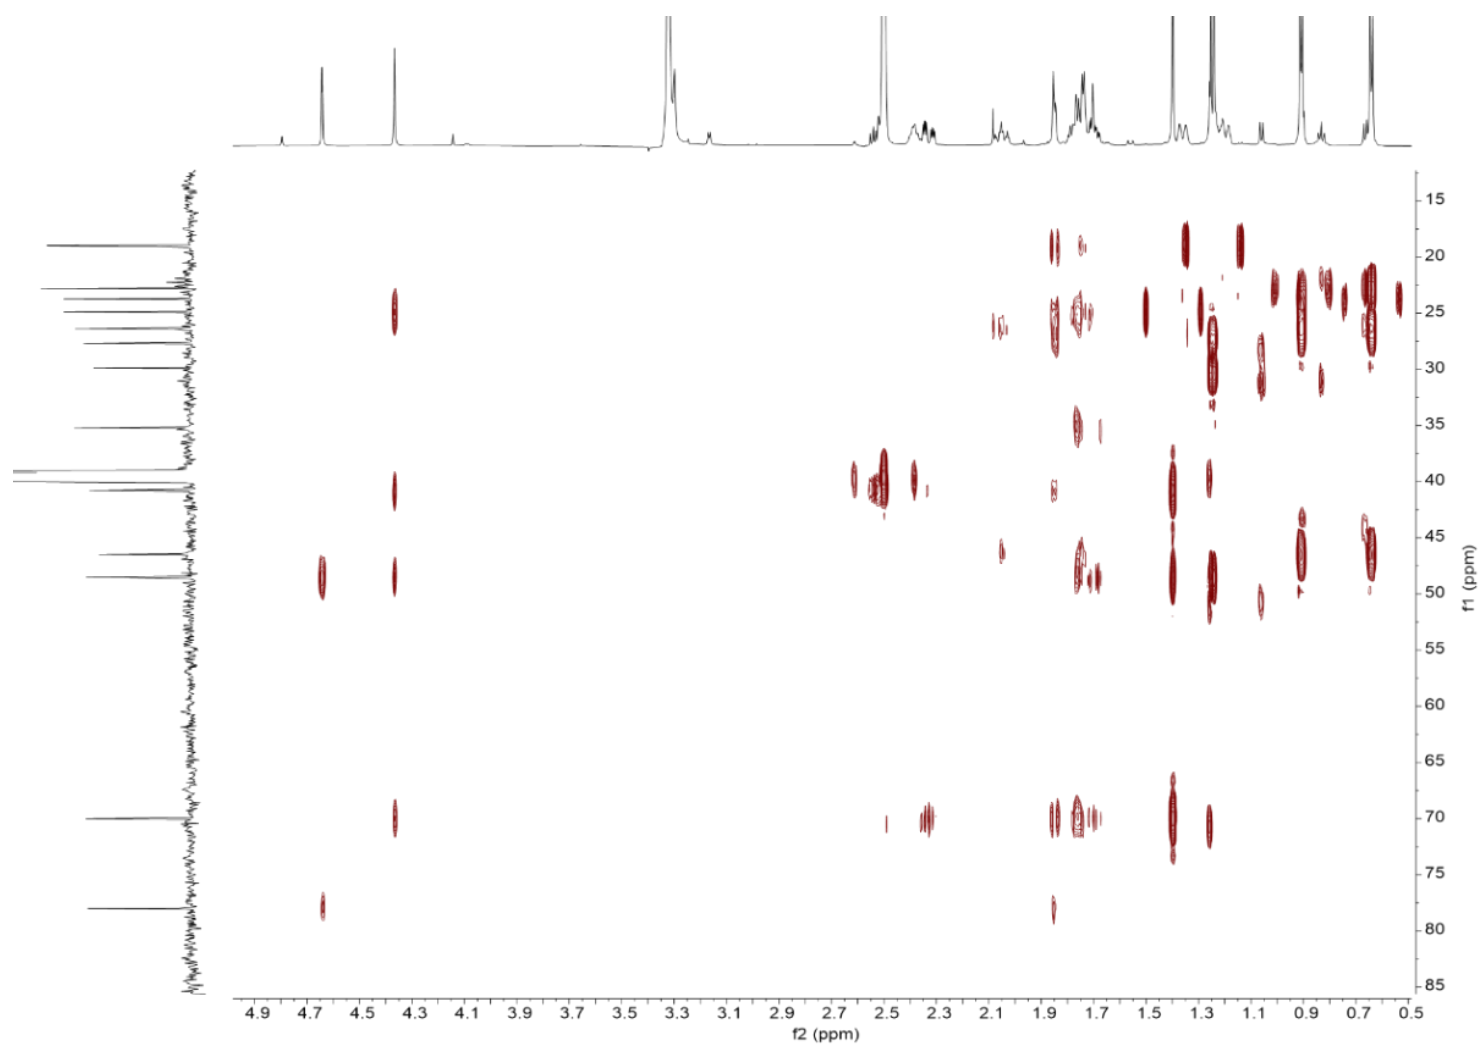

Figure S32. HMBC spectrum of **2** in DMSO- $d_6$  (expanded – 1)

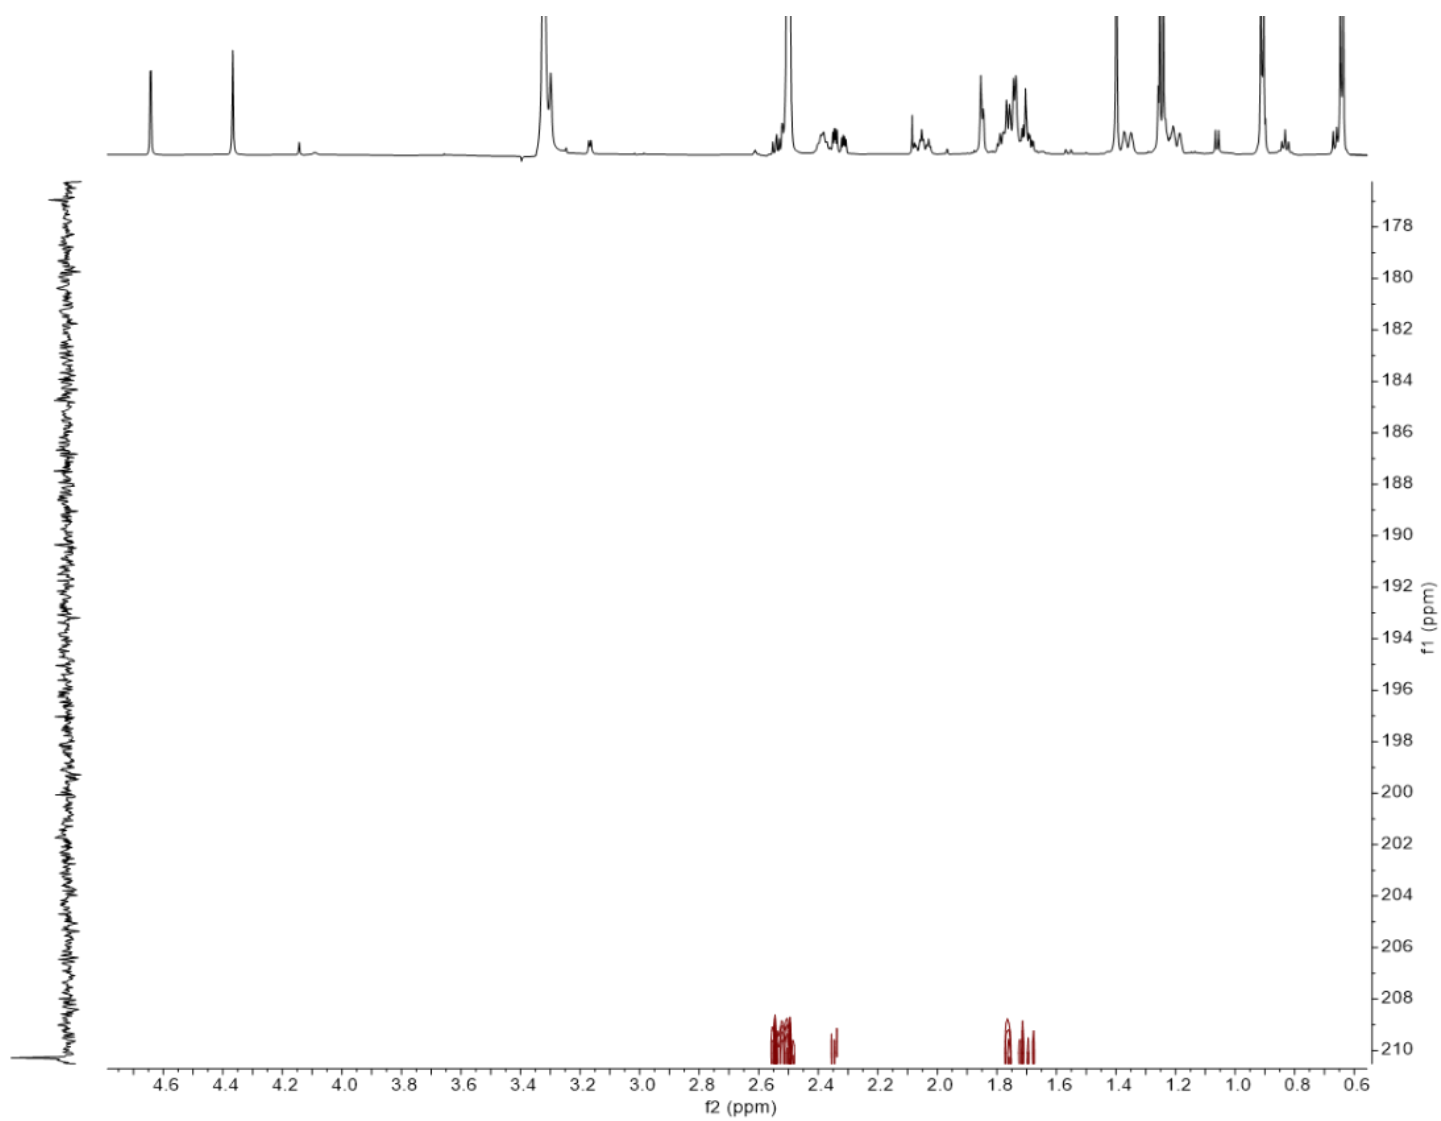

Figure S33. HMBC spectrum of **2** in  $\text{DMSO-}d_6$  (expanded - 2)

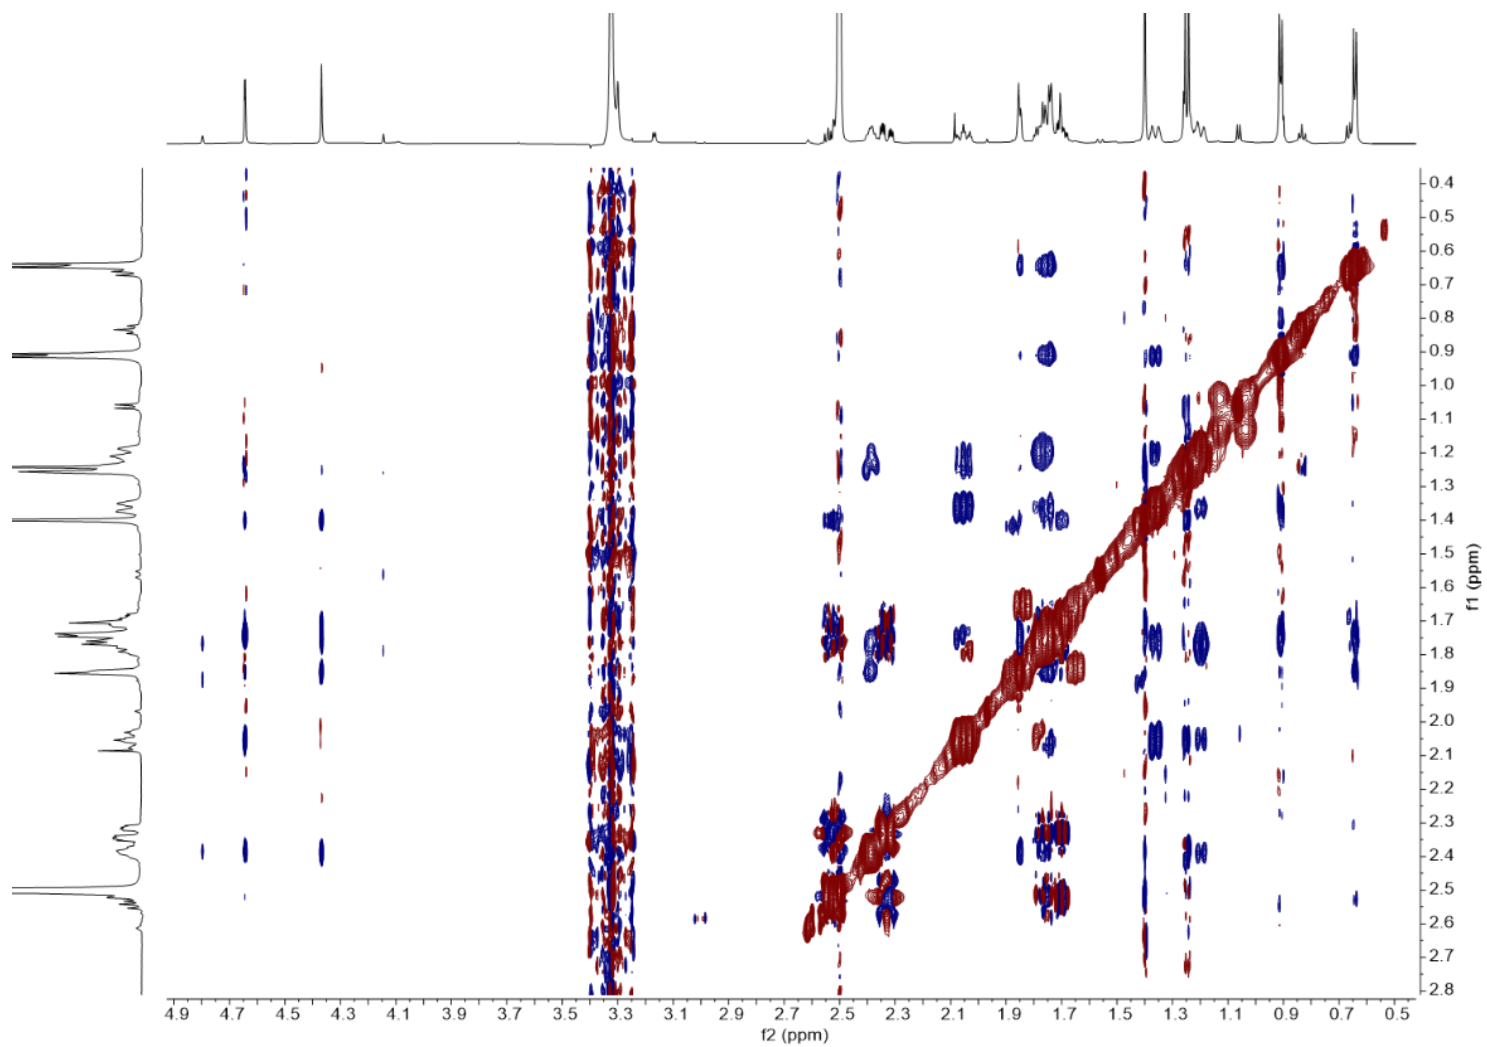

Figure S34. NOESY spectrum of **2** in DMSO-*d*<sub>6</sub>

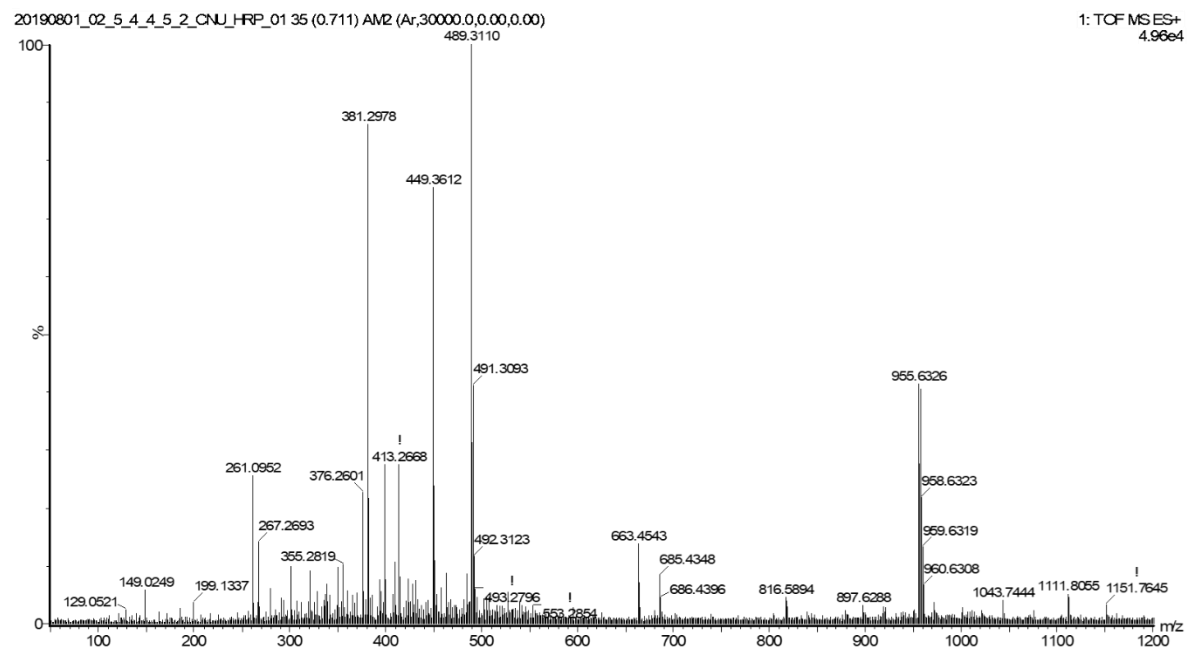

Figure S35. HRESIMS of **3**

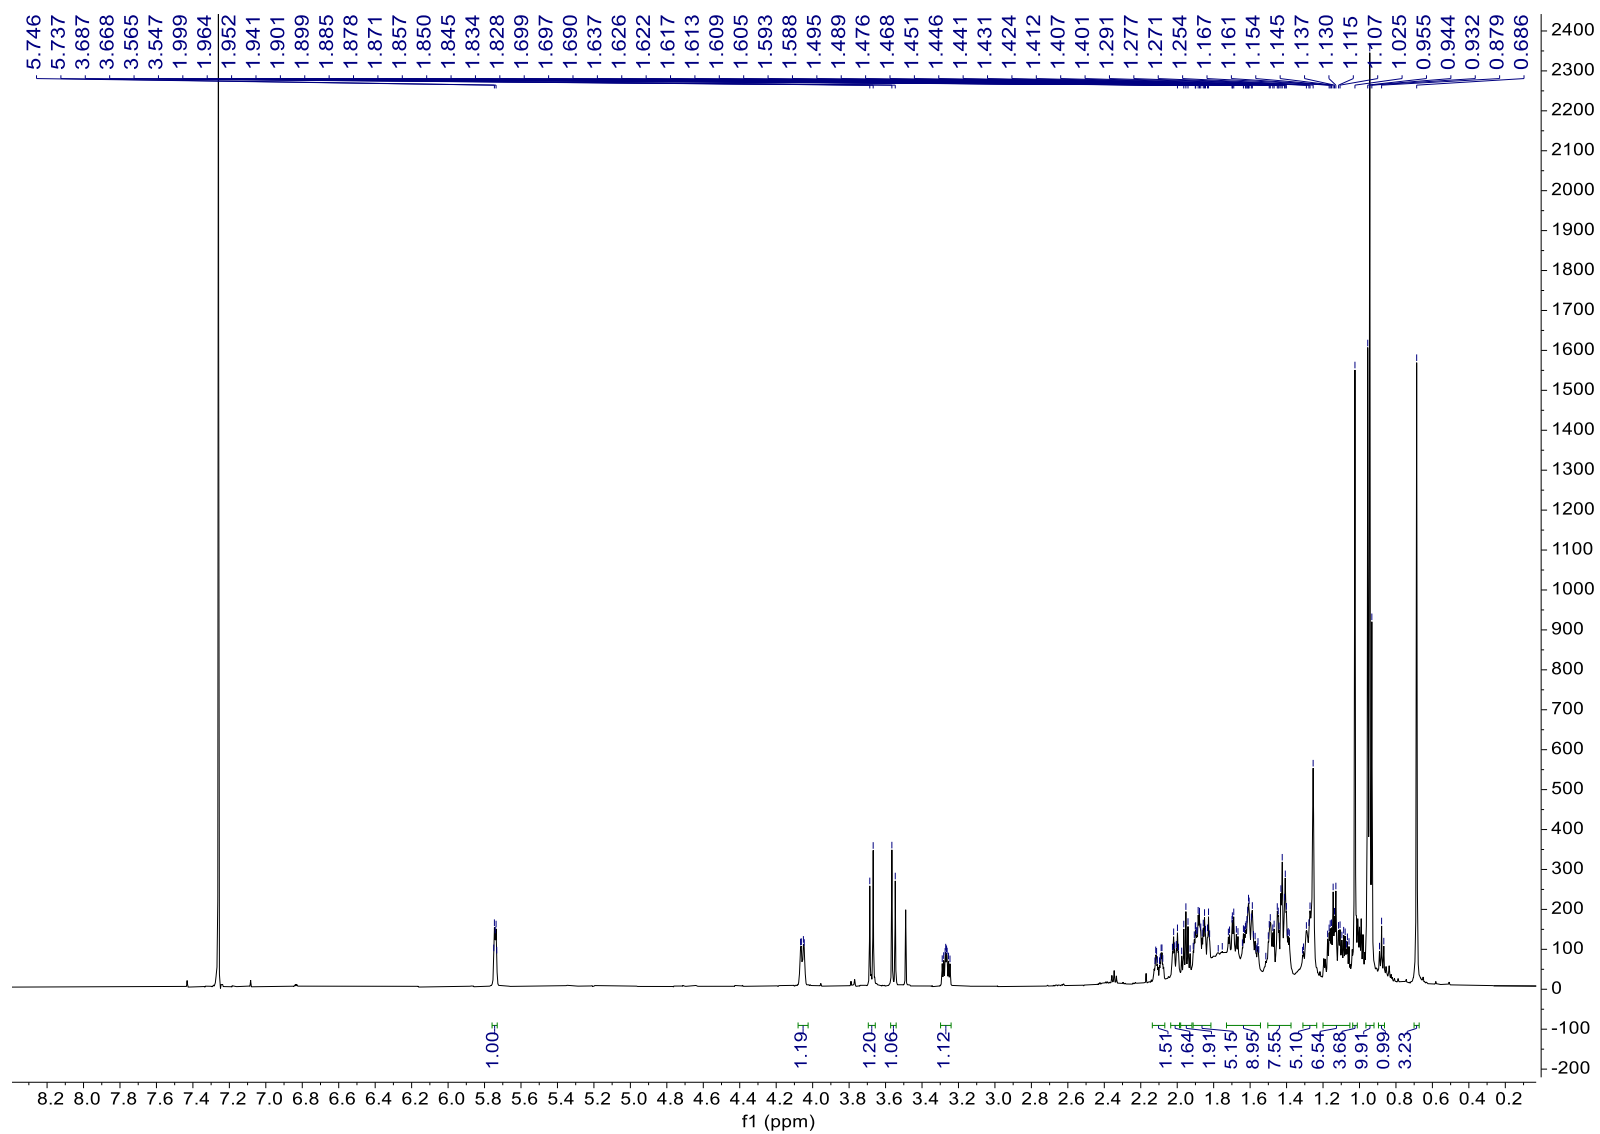

Figure S36. <sup>1</sup>H NMR data of **3** in CDCl<sub>3</sub>

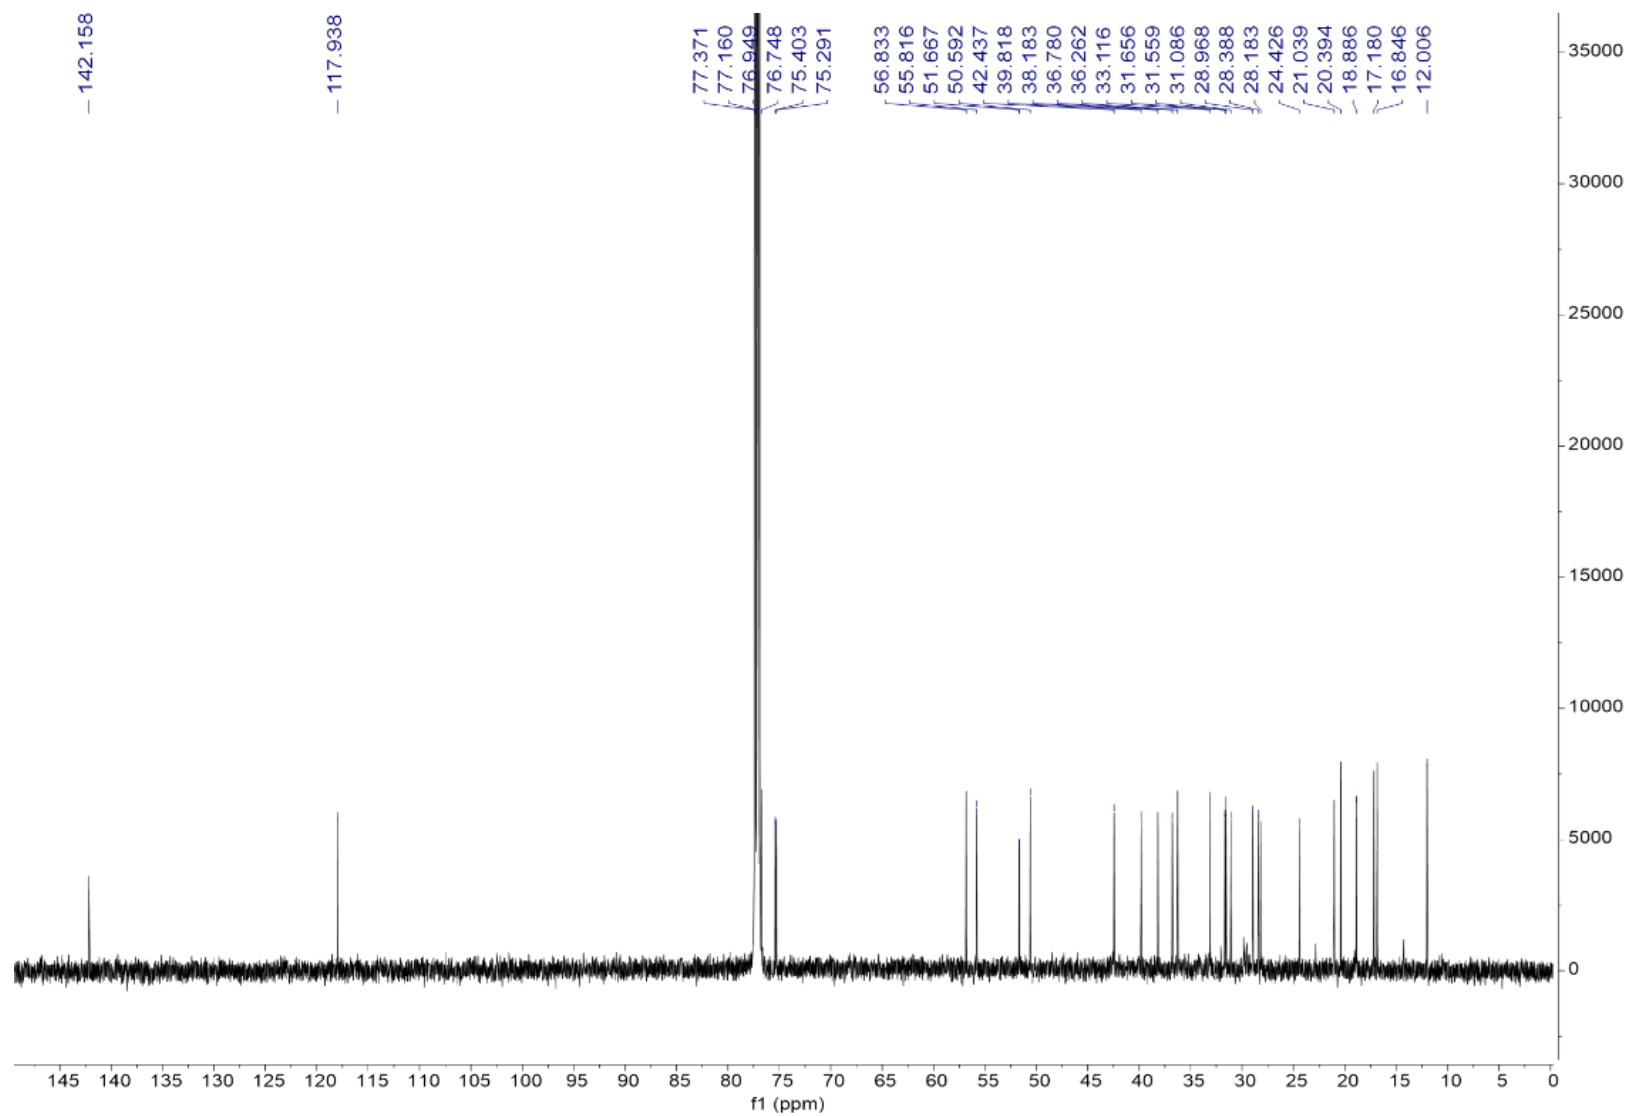

Figure S37. <sup>13</sup>C NMR data of **3** in CDCl<sub>3</sub>



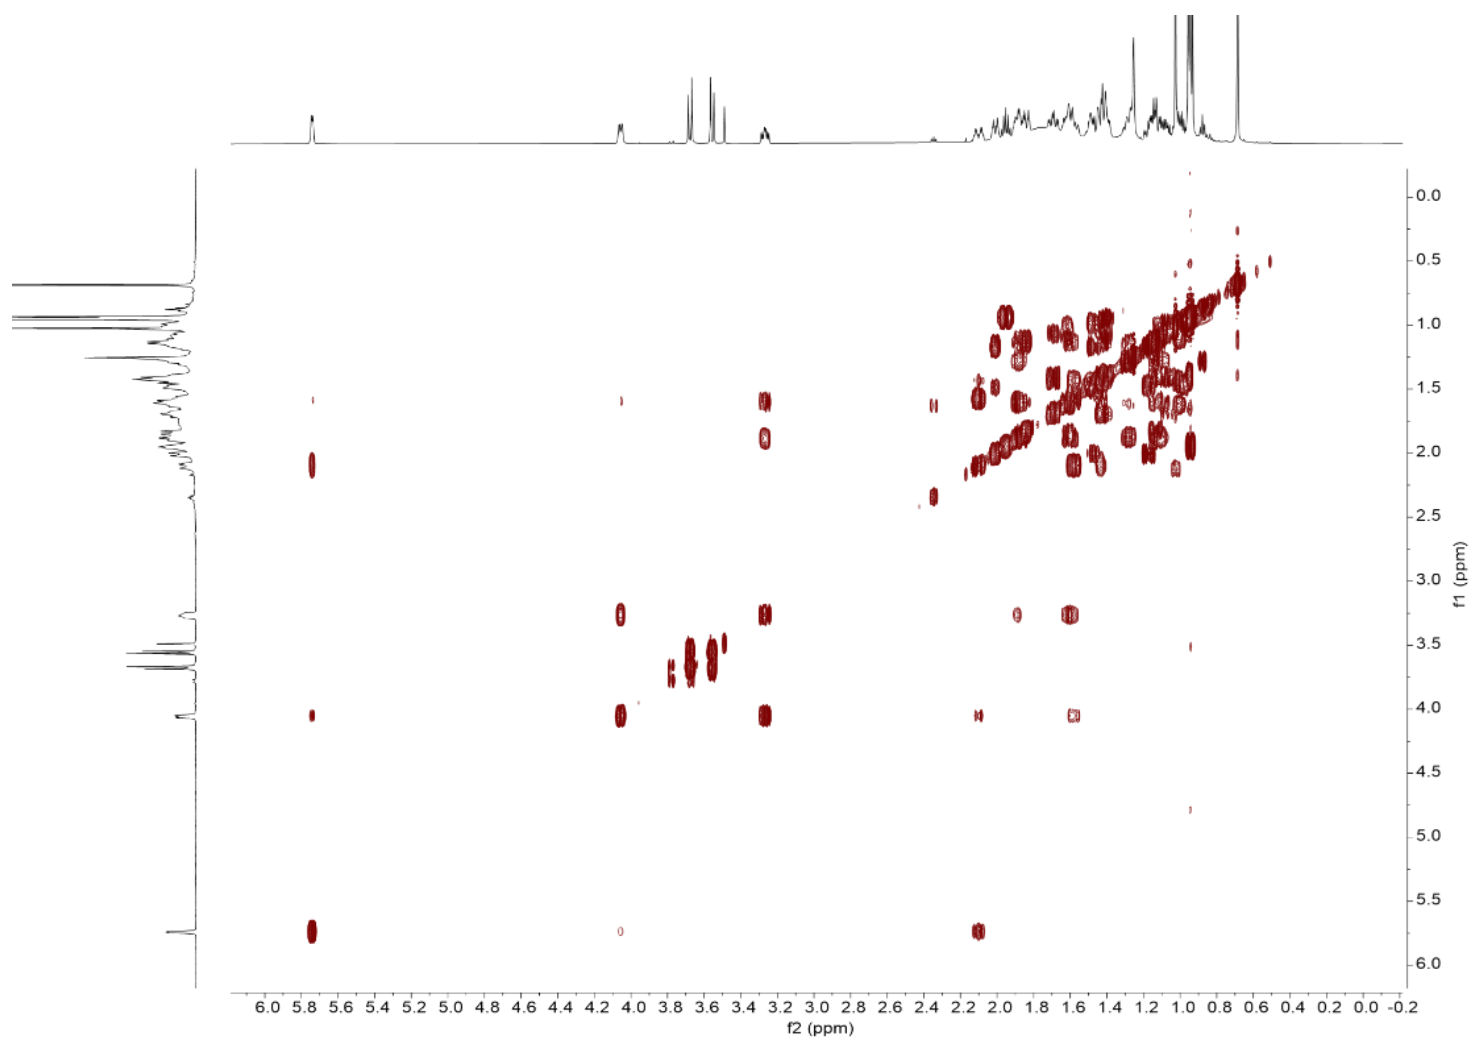

Figure S38. COSY spectrum of **3** in CDCl<sub>3</sub>

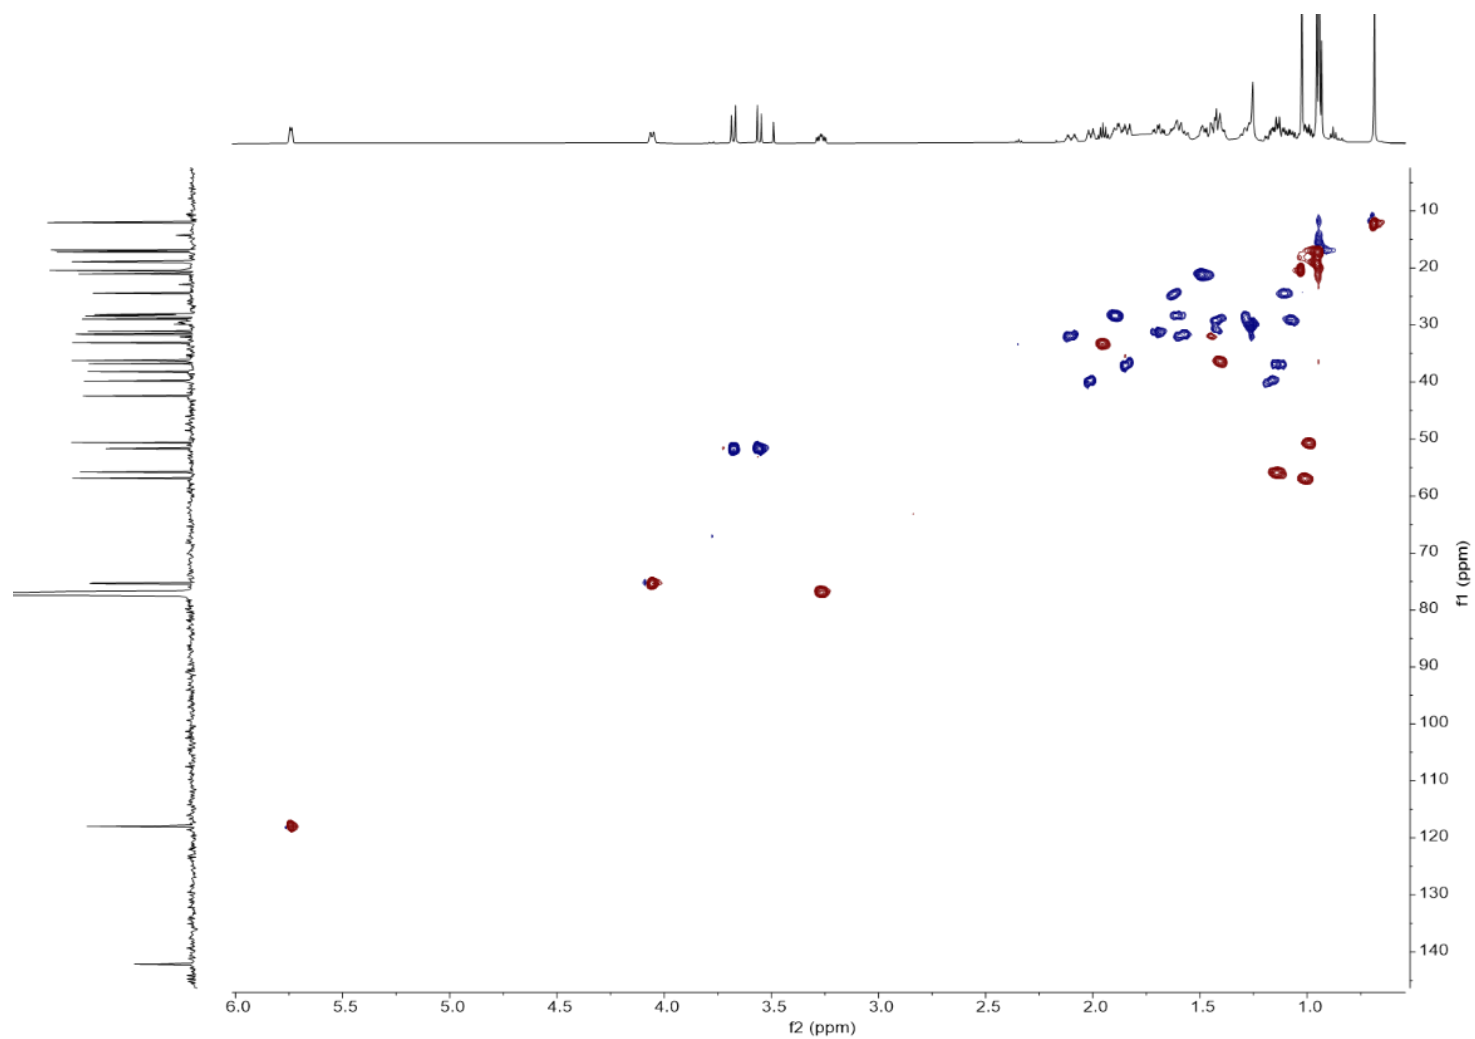

Figure S39. HSQC spectrum of **3** in CDCl<sub>3</sub>

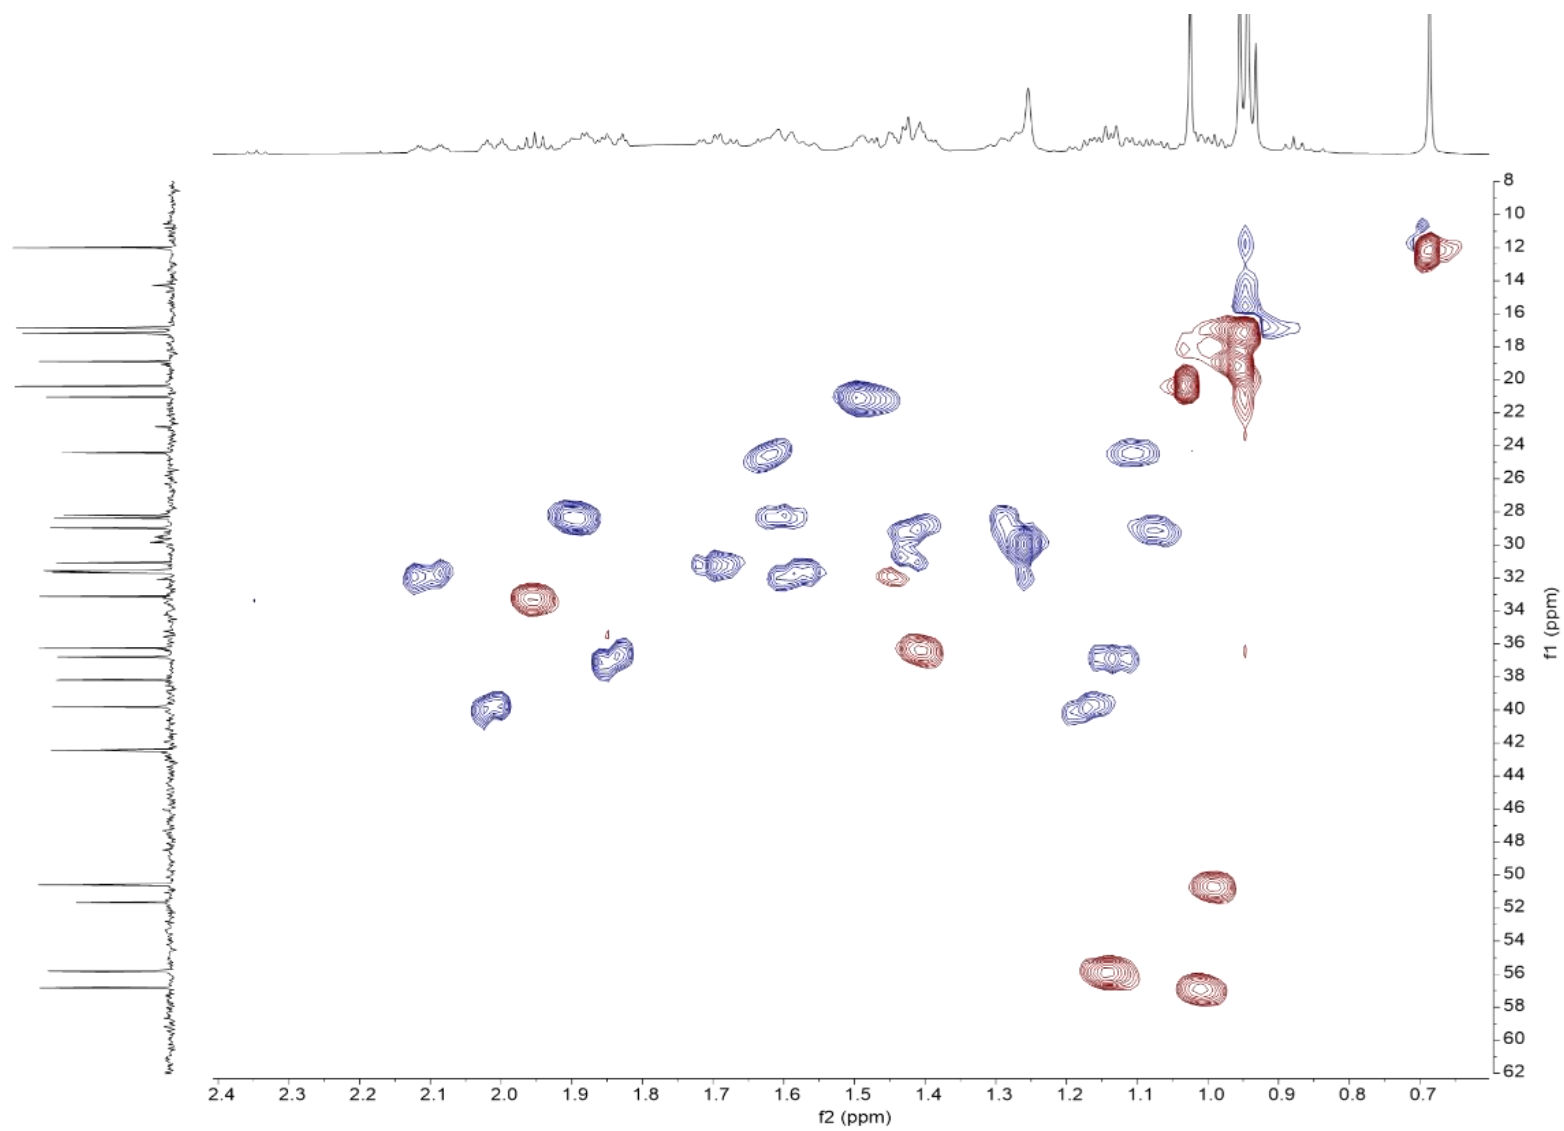

Figure S40. HSQC spectrum of **3** in CDCl<sub>3</sub> (expanded)

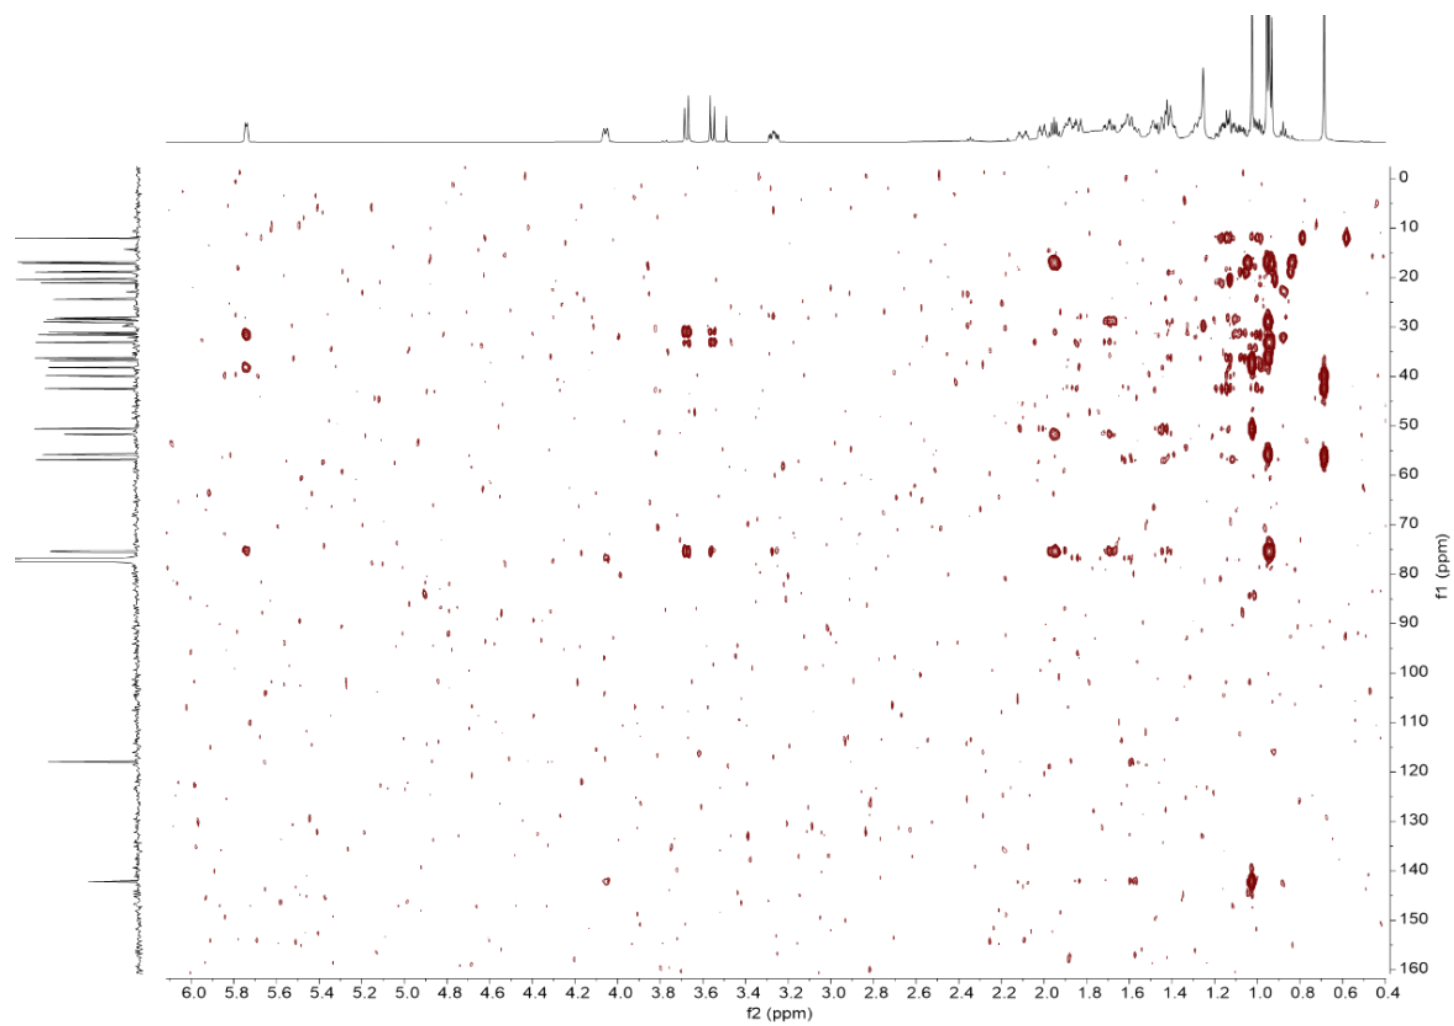

Figure S41. HMBC spectrum of **3** in CDCl<sub>3</sub>

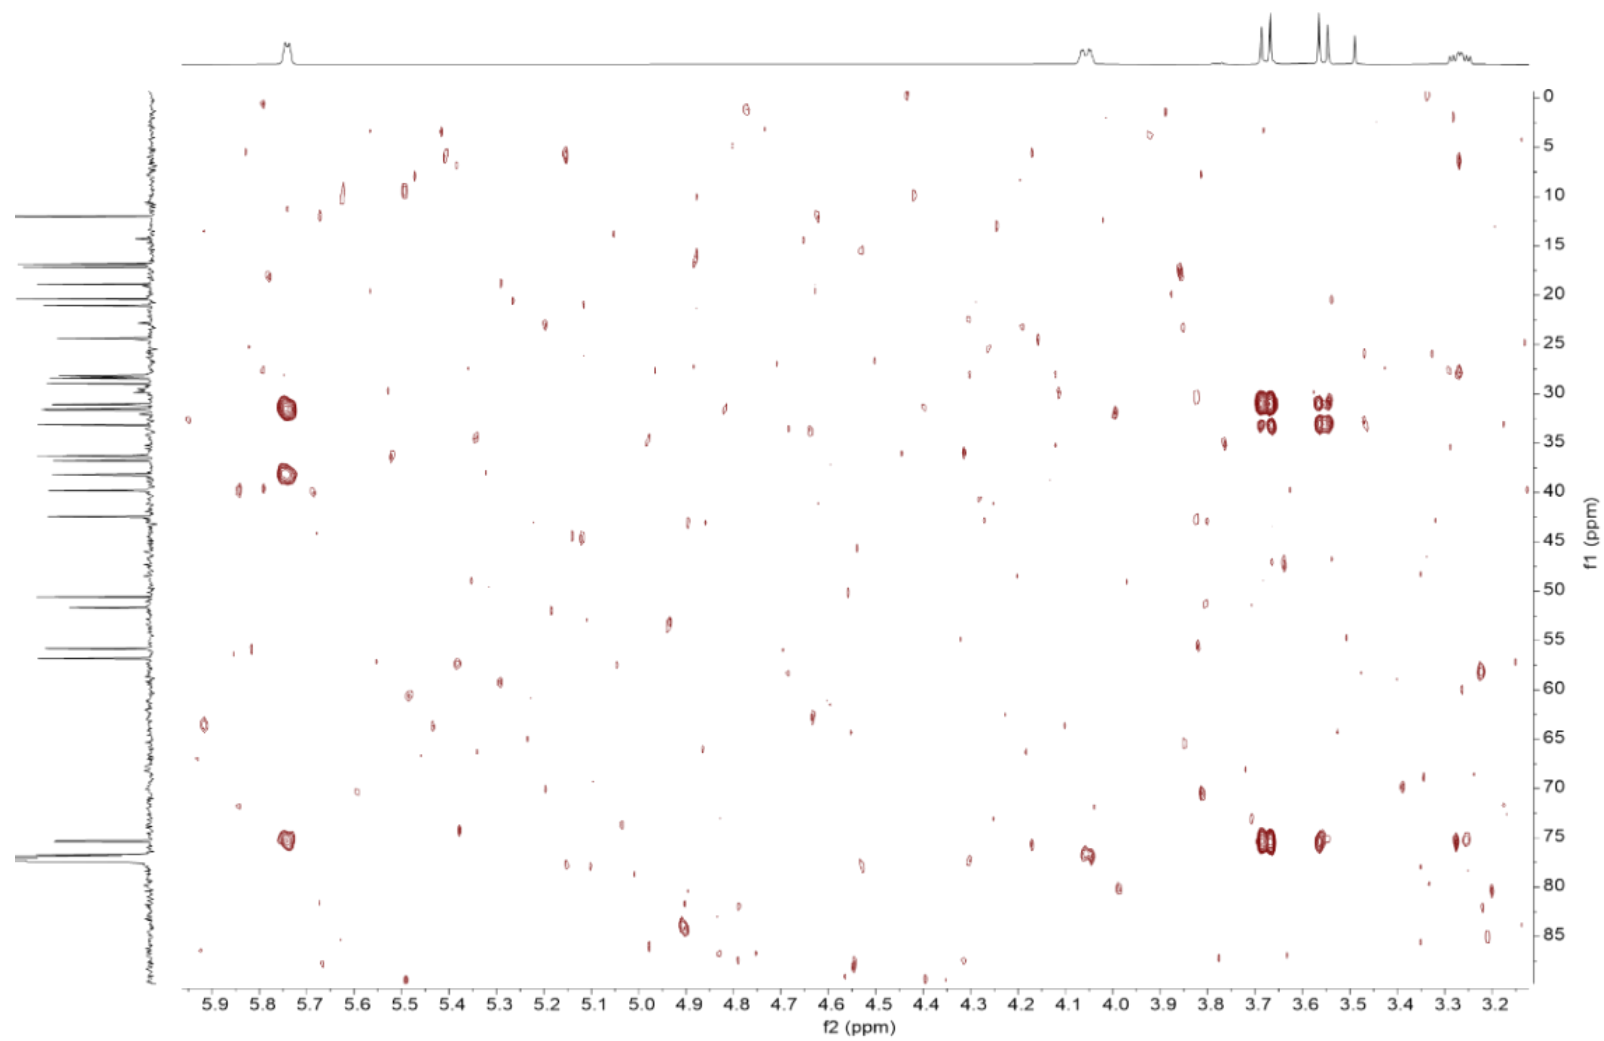

Figure S42. HMBC spectrum of **3** in  $\text{CDCl}_3$  (expanded - 1)

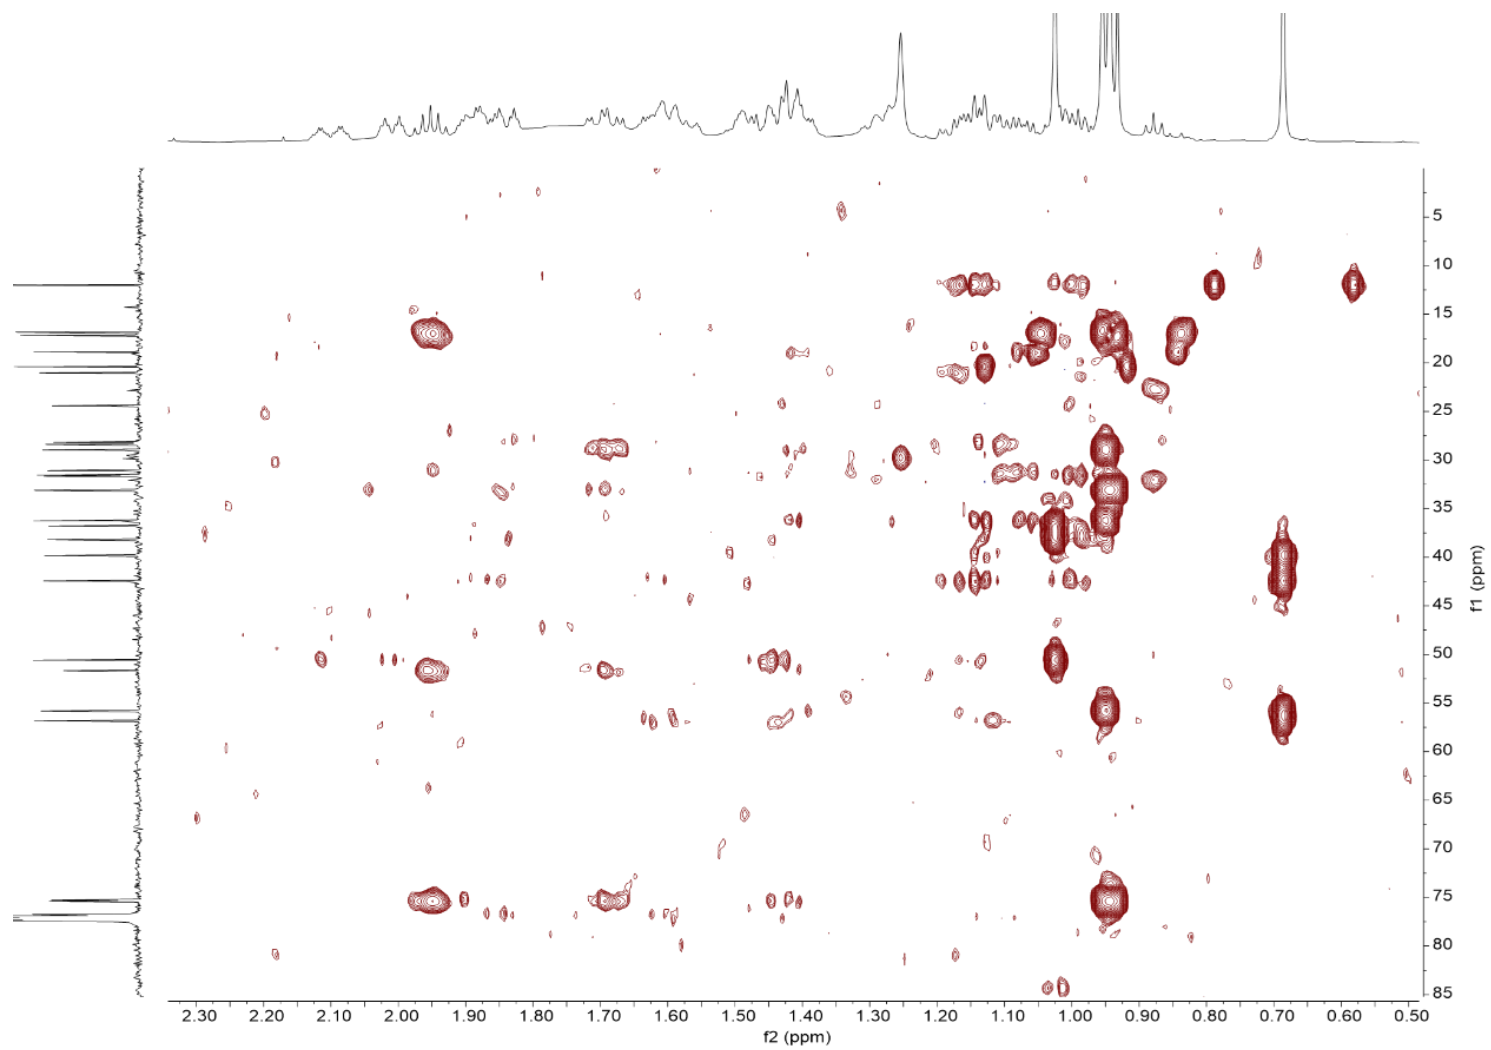

Figure S43. HMBC spectrum of **3** in CDCl<sub>3</sub> (expanded- 2)

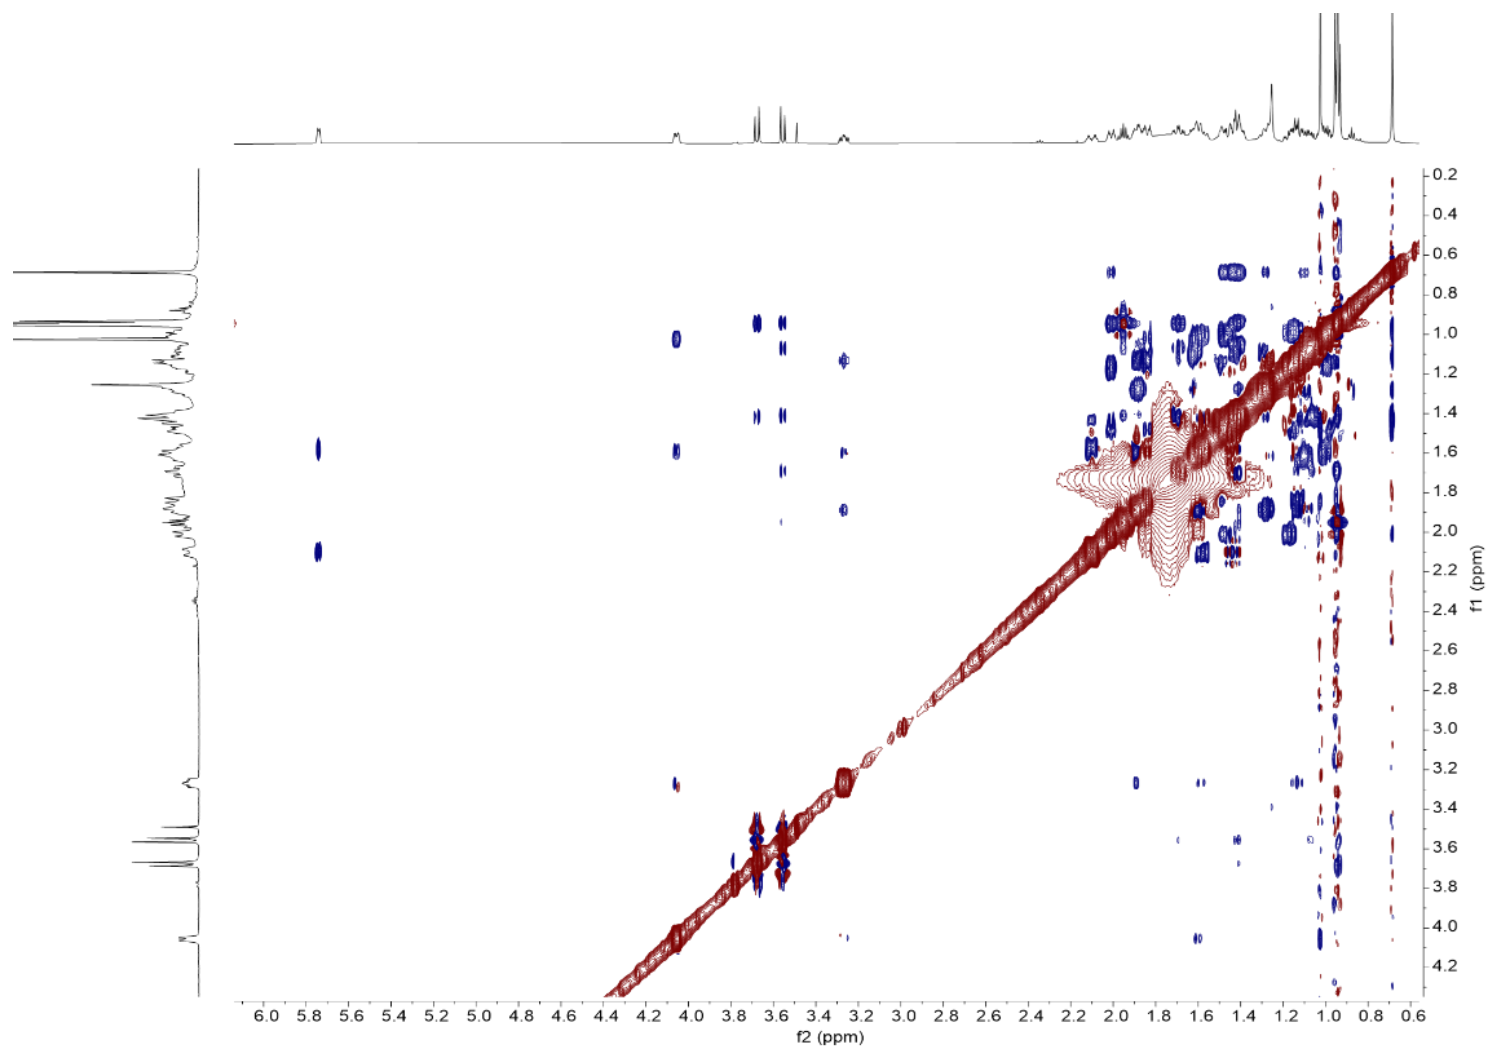

Figure S44. NOESY spectrum of **3** in CDCl<sub>3</sub>

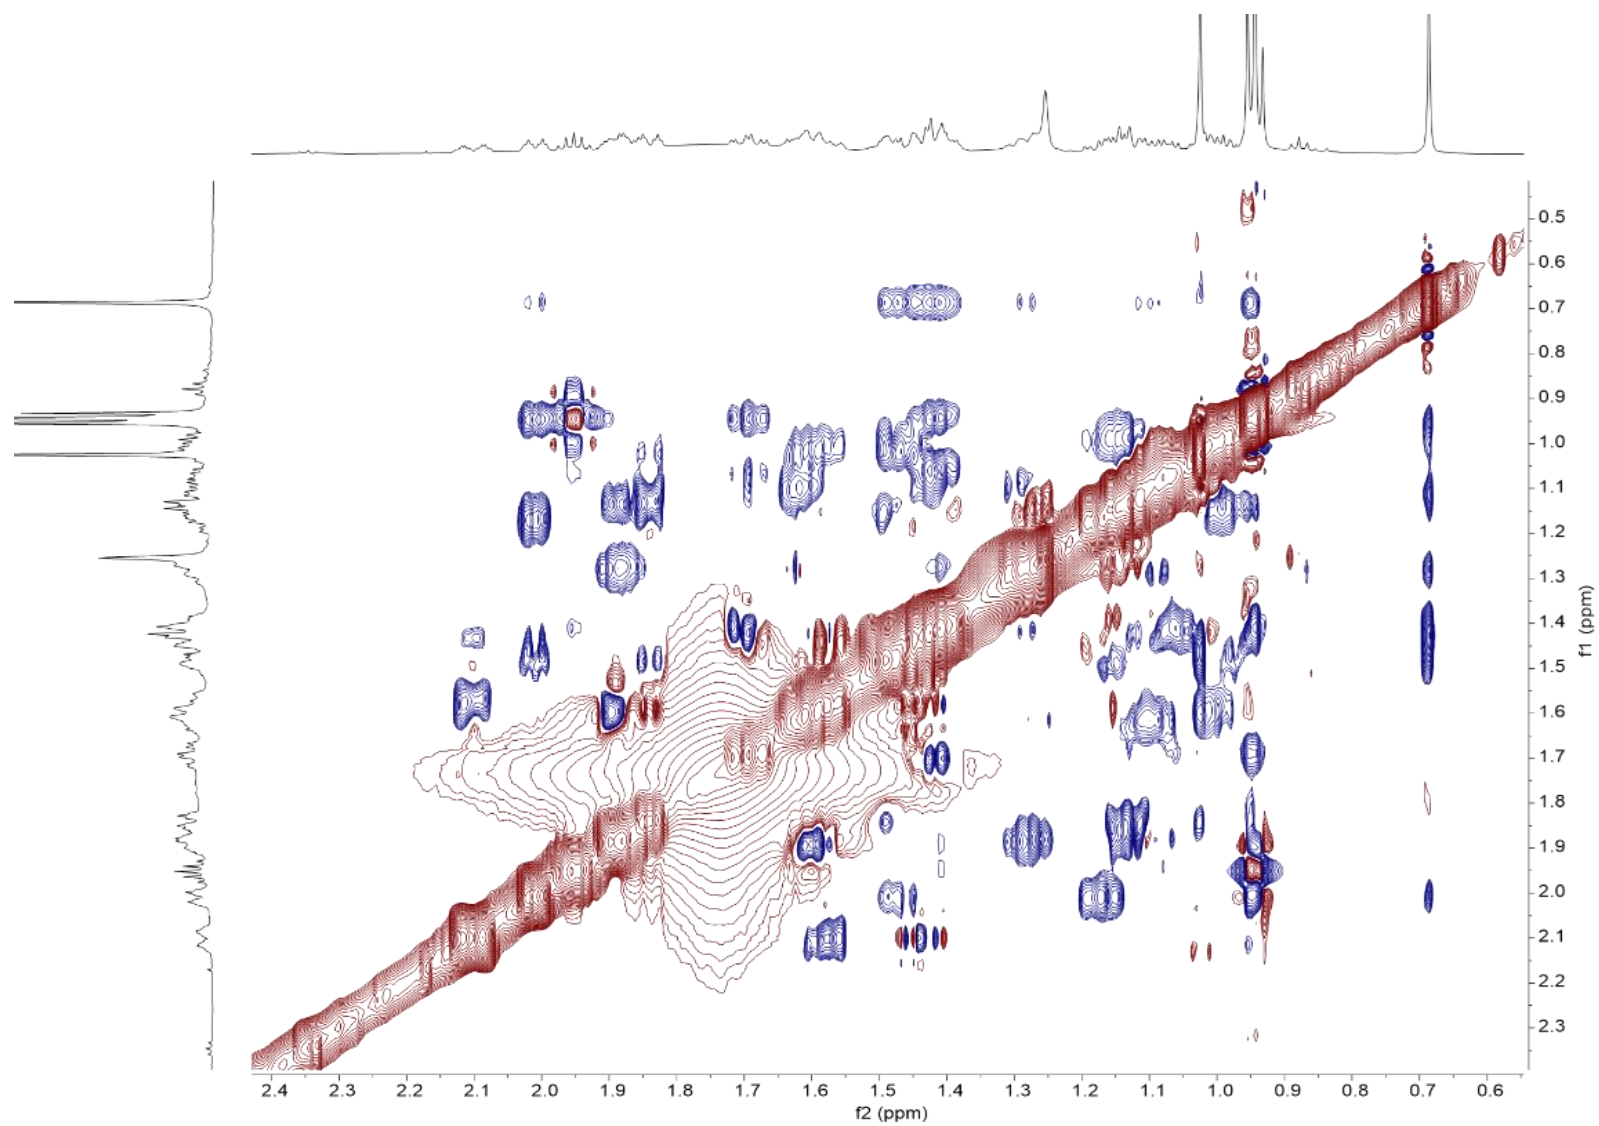

Figure S45. NOESY spectrum of 3 in CDCl<sub>3</sub> (expanded)



20190801\_03\_5\_3\_4\_32\_24\_CNU\_HRP\_01 57 (1.145) AM2 (Ar, 30000.0, 0.00, 0.00); Cm (44:62)

1: TOF MS ES+  
4.73e5

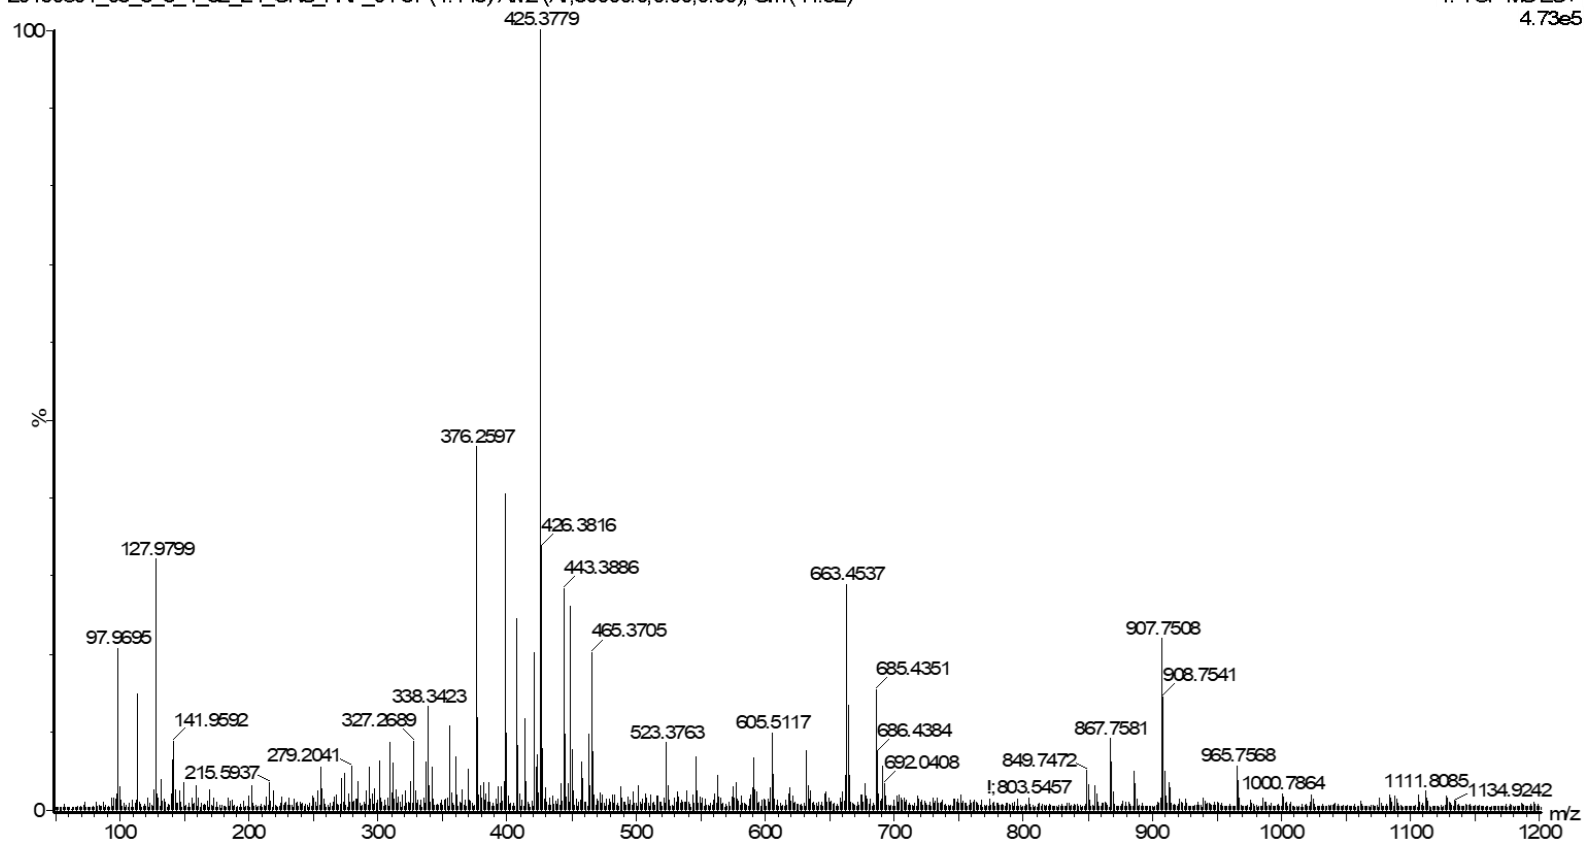

Figure S46. HRESIMS of 4

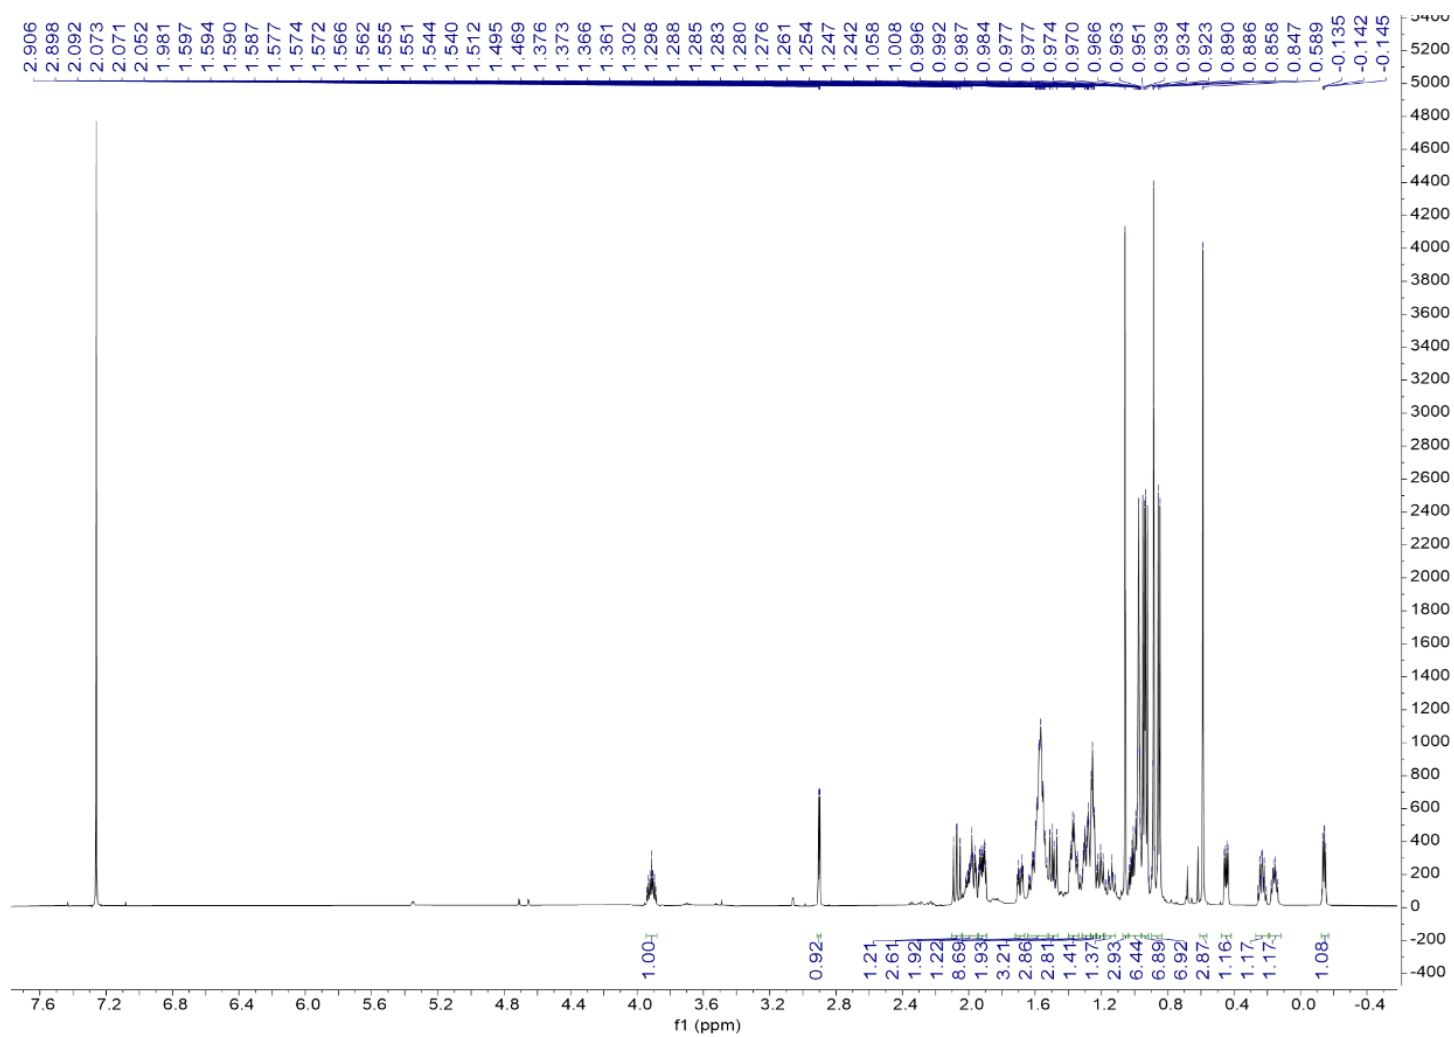

Figure S47.  $^1\text{H}$  NMR spectrum of **4** in  $\text{CDCl}_3$

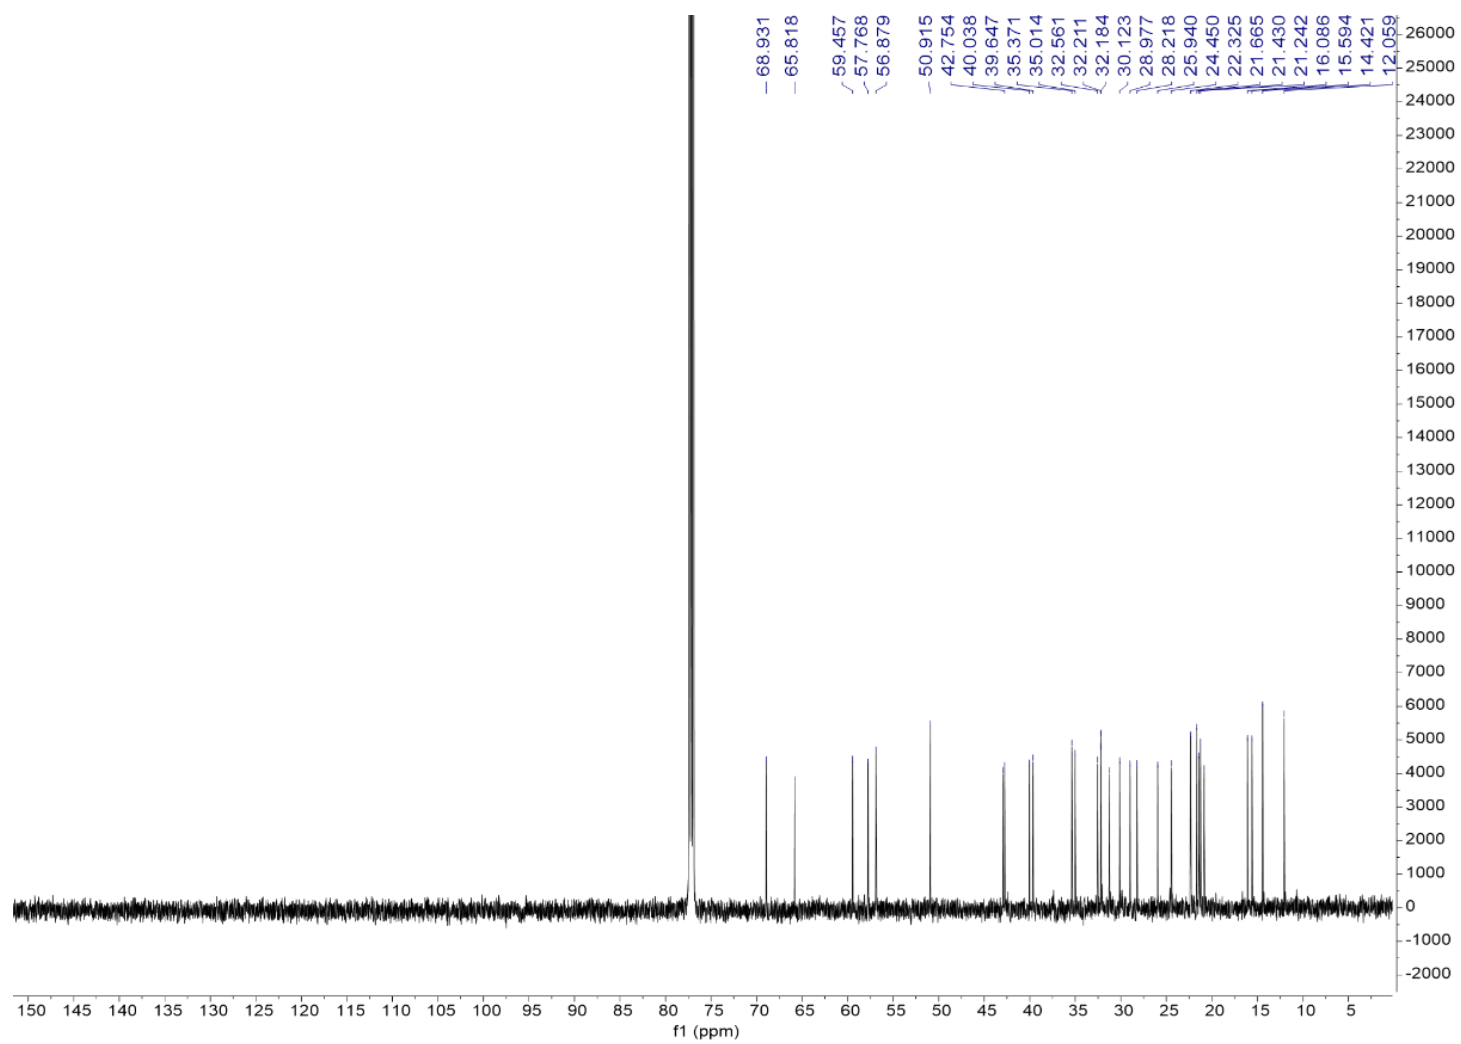

Figure S48. <sup>13</sup>C NMR spectrum of **4** in CDCl<sub>3</sub>

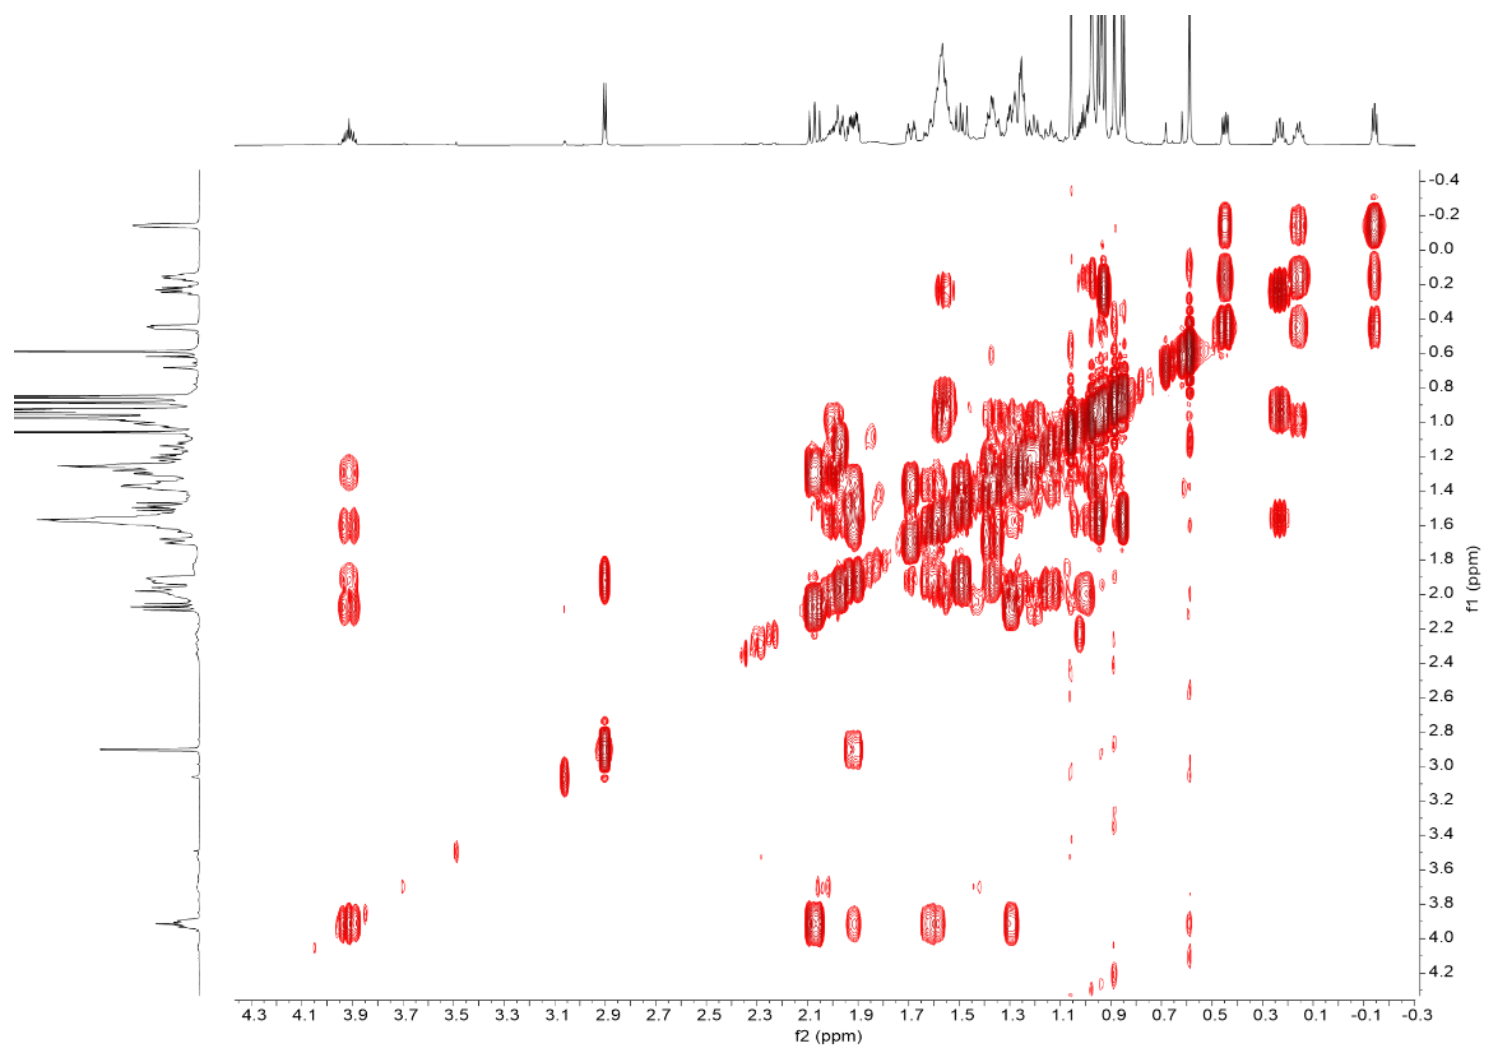

Figure S49. COSY spectrum of **4** in CDCl<sub>3</sub>

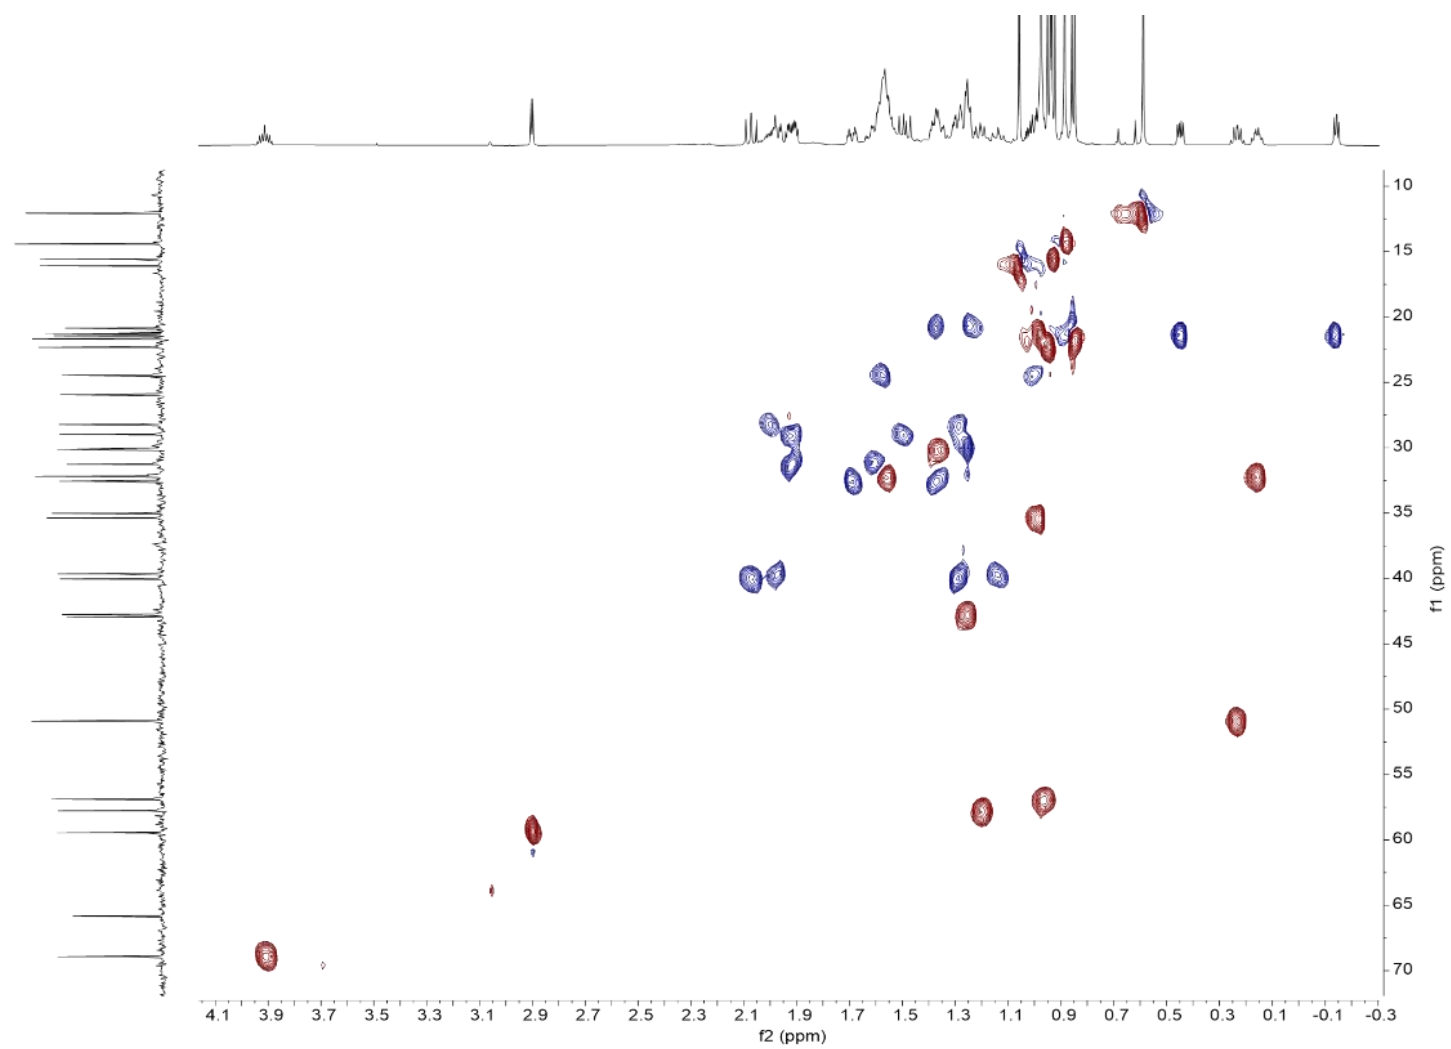

Figure S50. HSQC spectrum of **4** in  $\text{CDCl}_3$

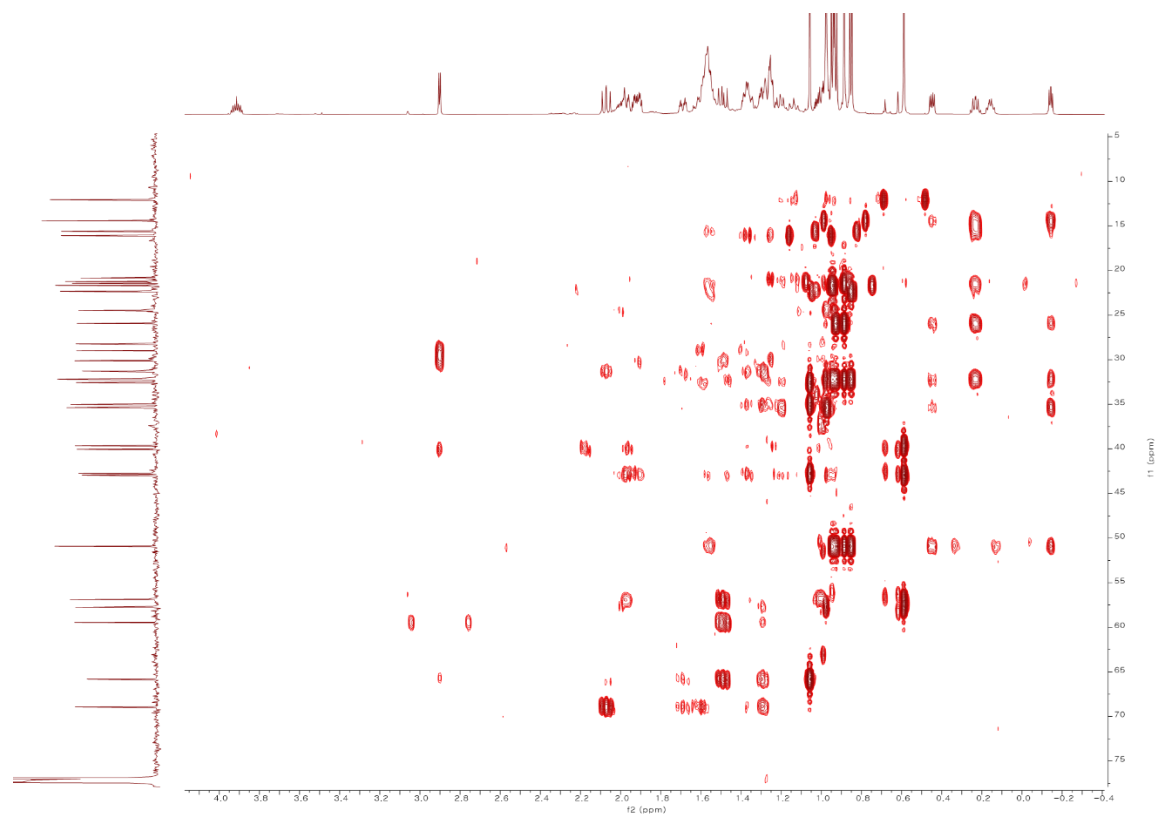

Figure S51. HMBC spectrum of **4** in CDCl<sub>3</sub>

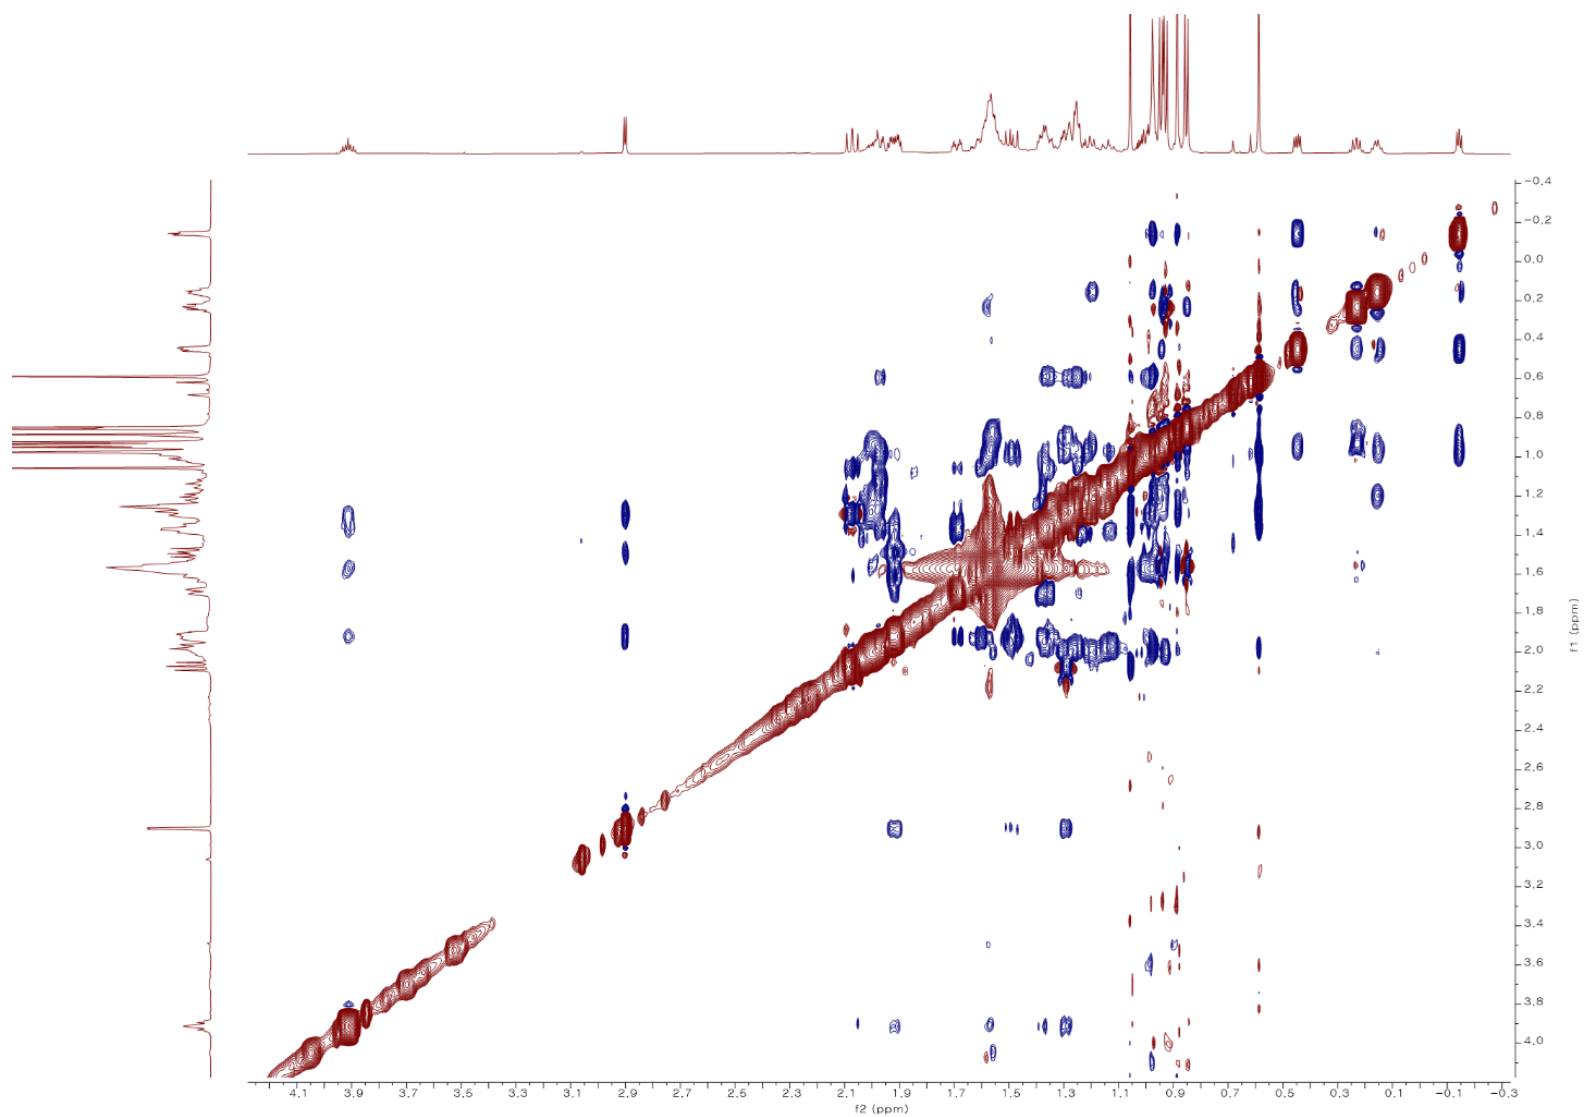

Figure S52. NOESY spectrum of **4** in CDCl<sub>3</sub>

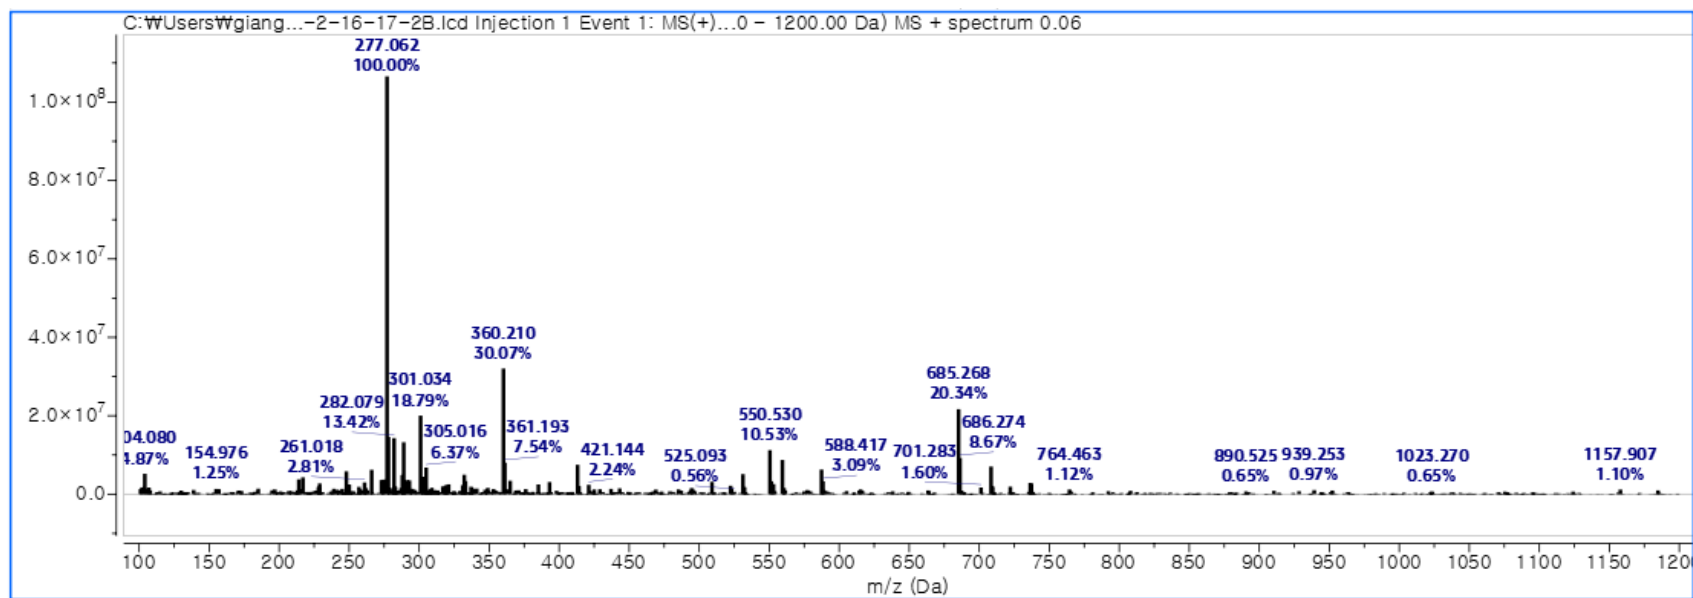

Figure S53. ESI-MS of 5



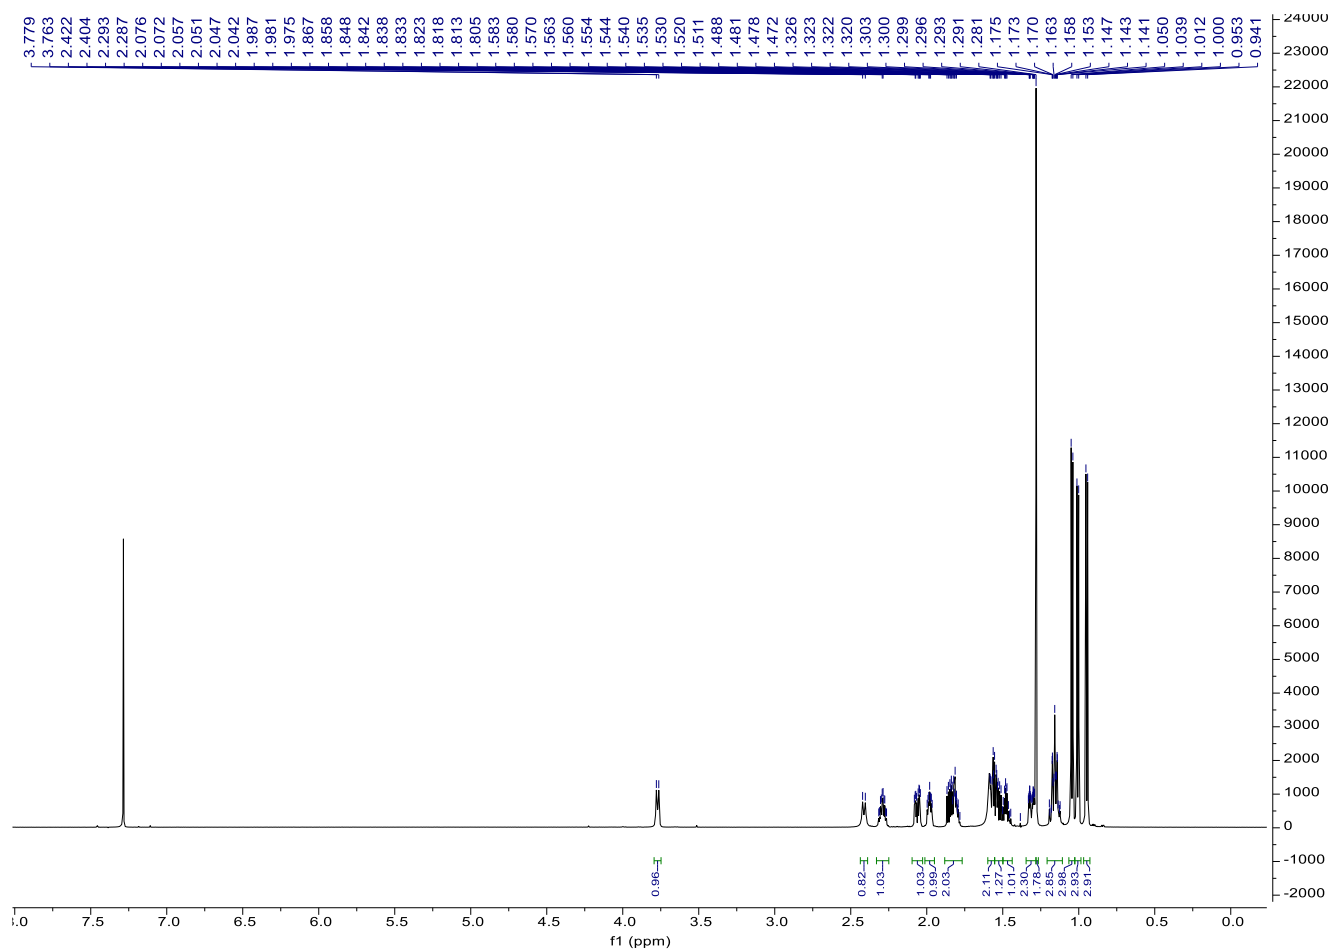

Figure S54.  $^1\text{H}$  NMR spectrum of **5** in  $\text{CDCl}_3$

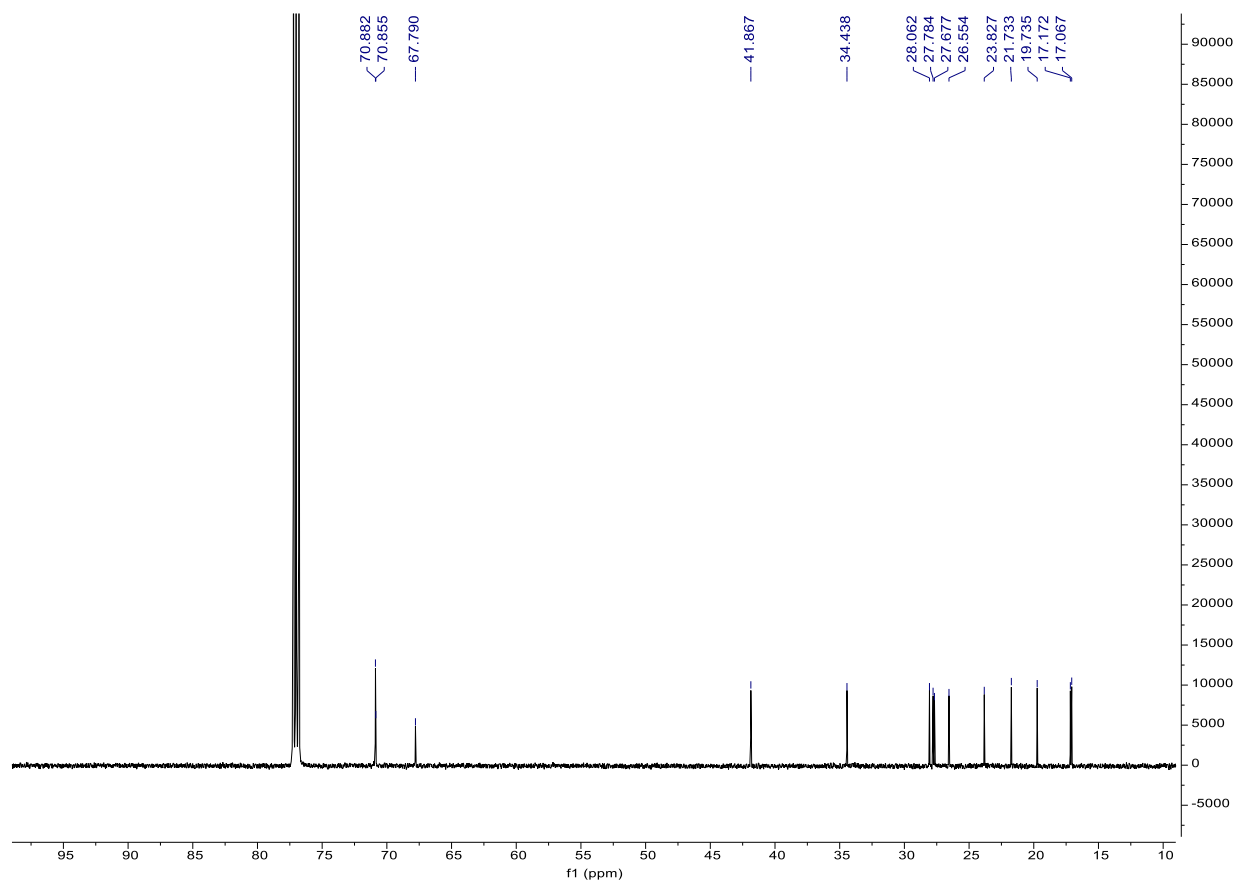

Figure S55. <sup>13</sup>C NMR spectrum of 5 in CDCl<sub>3</sub>

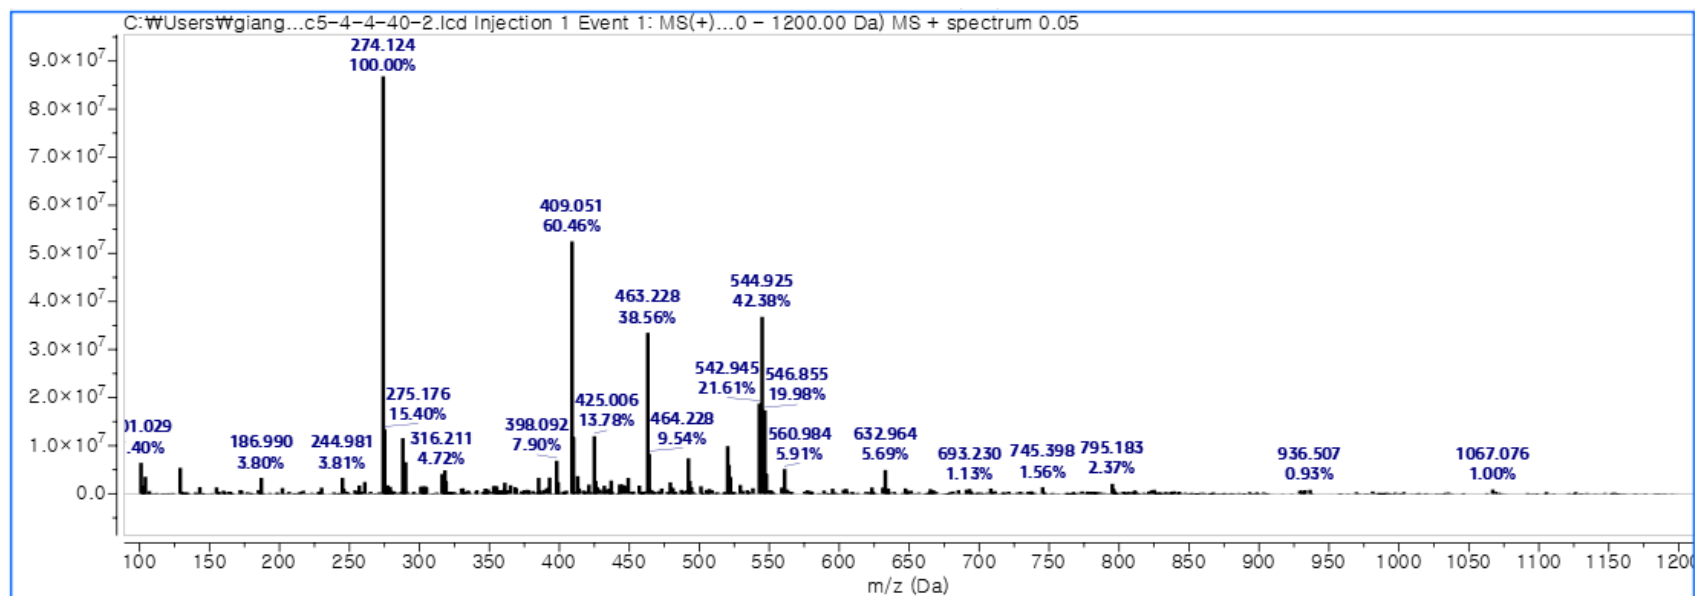

Figure S56. ESI-MS of 6

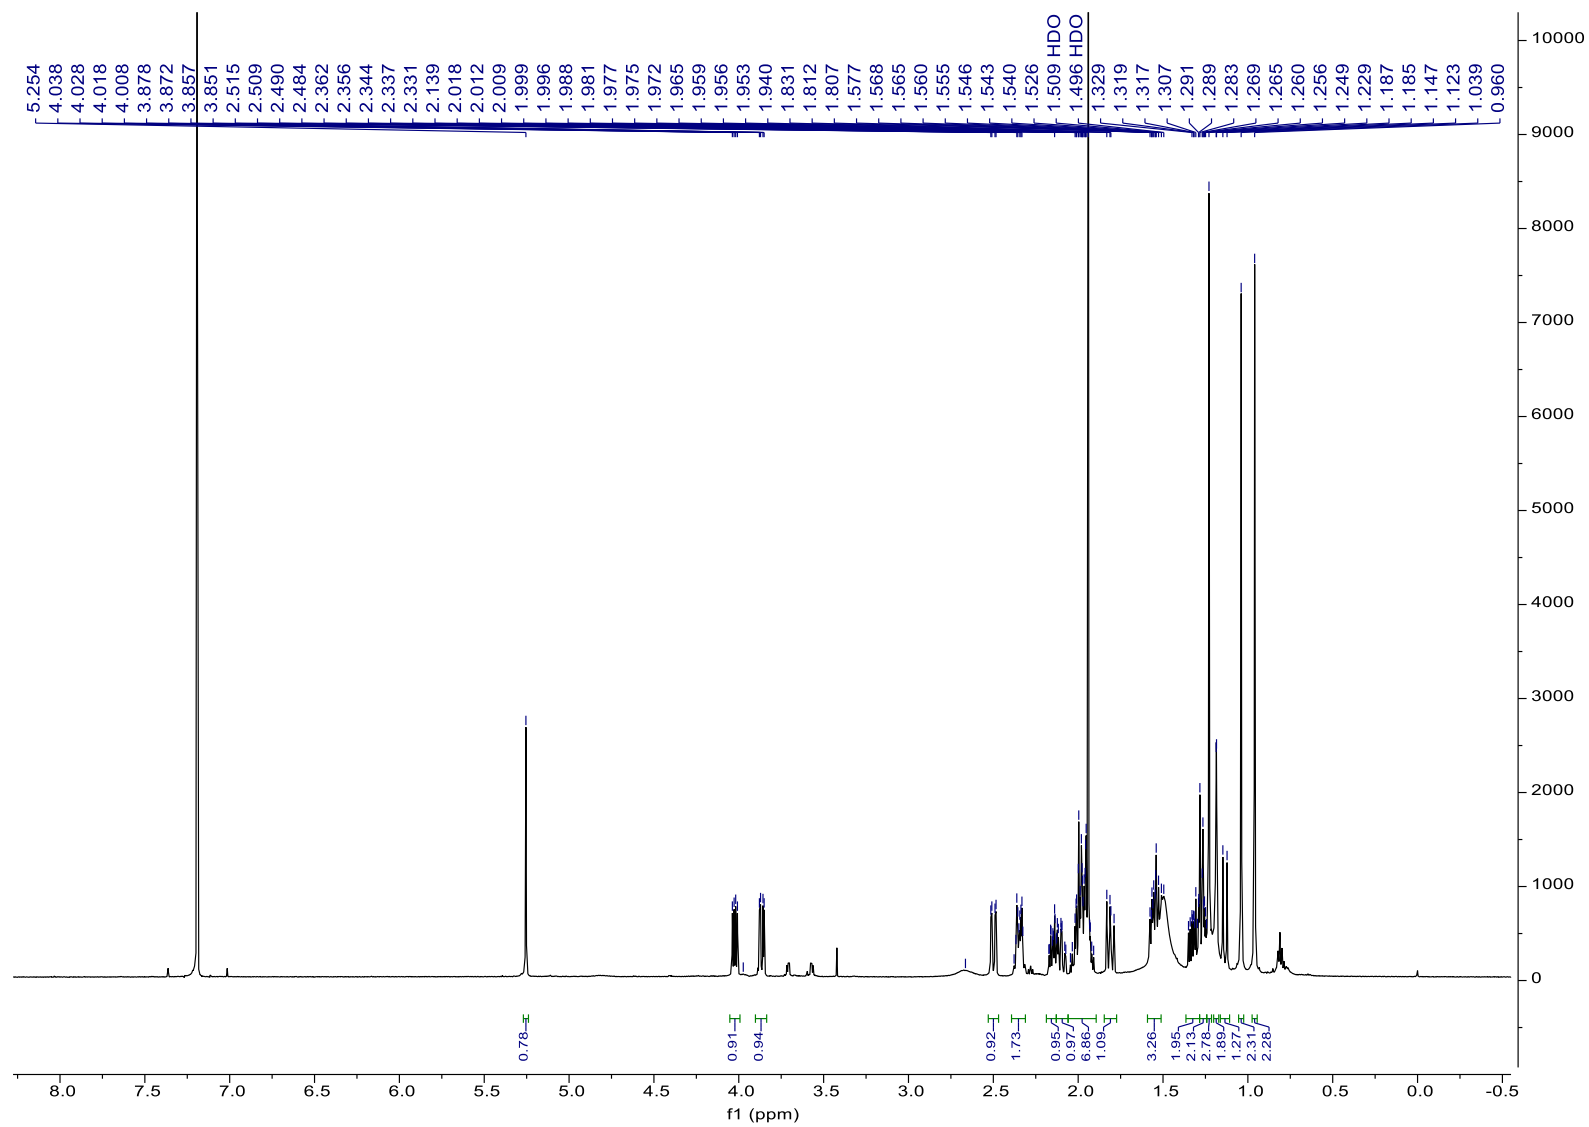

Figure S57.  $^1\text{H}$  NMR spectrum of **6** in  $\text{CDCl}_3$

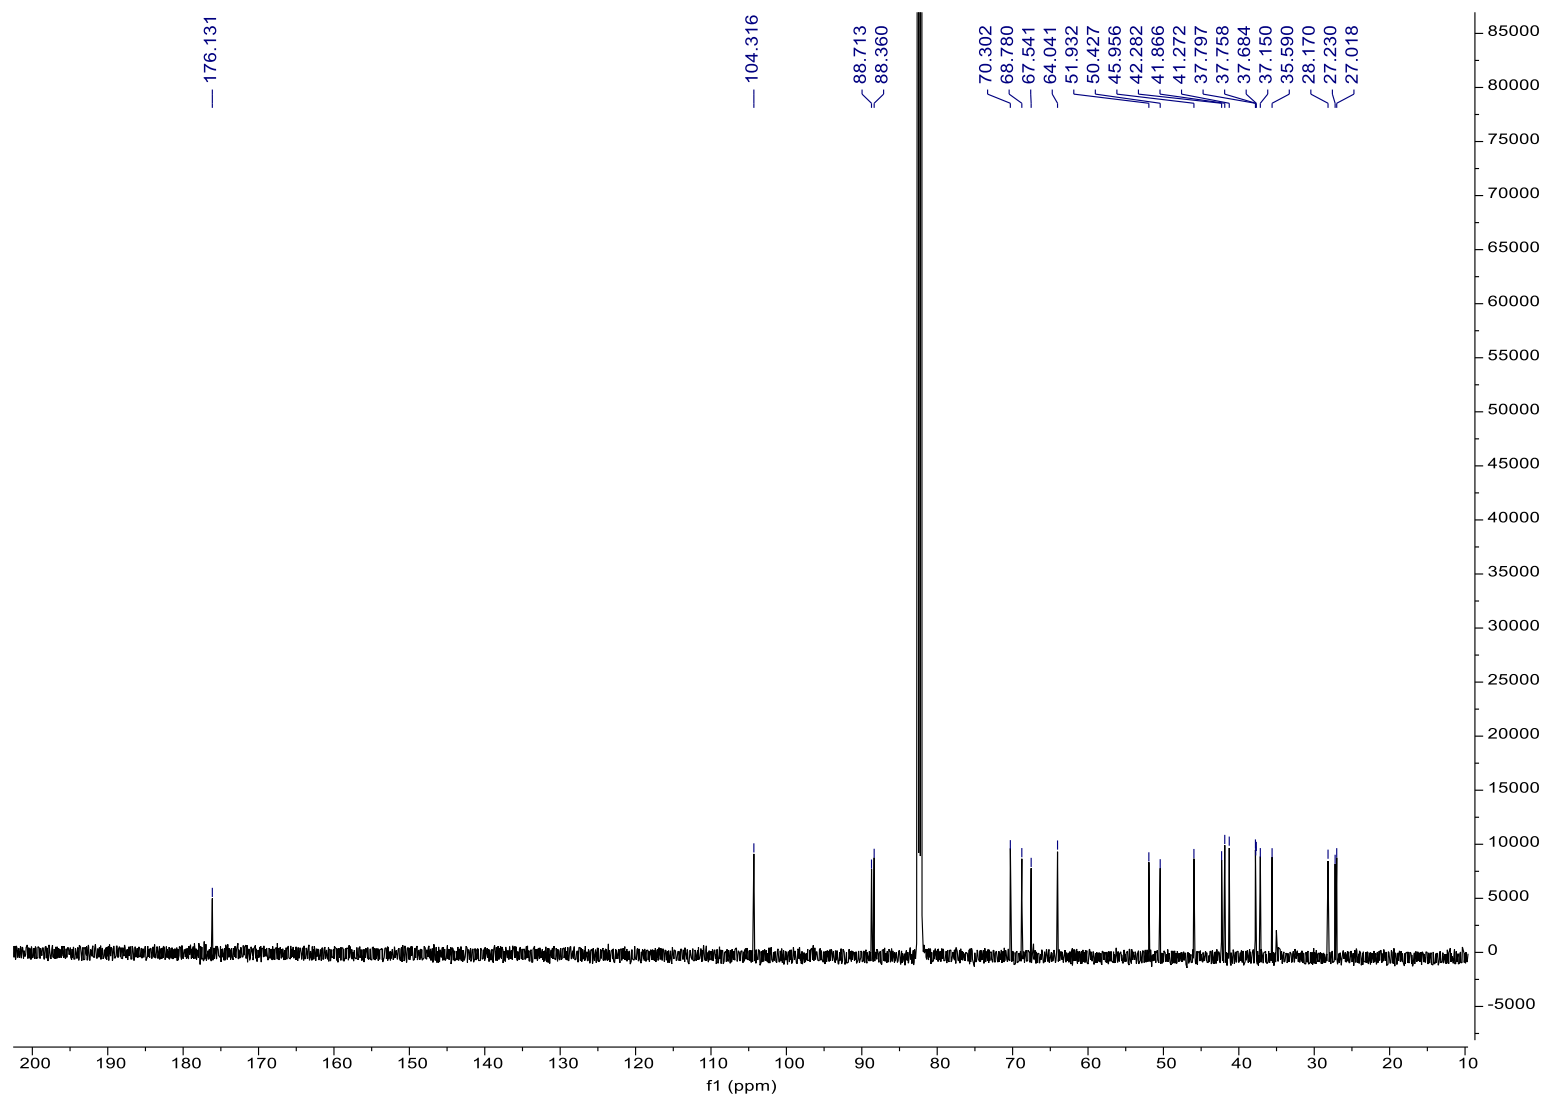

Figure S58.  $^{13}\text{C}$  NMR spectrum of **6** in  $\text{CDCl}_3$

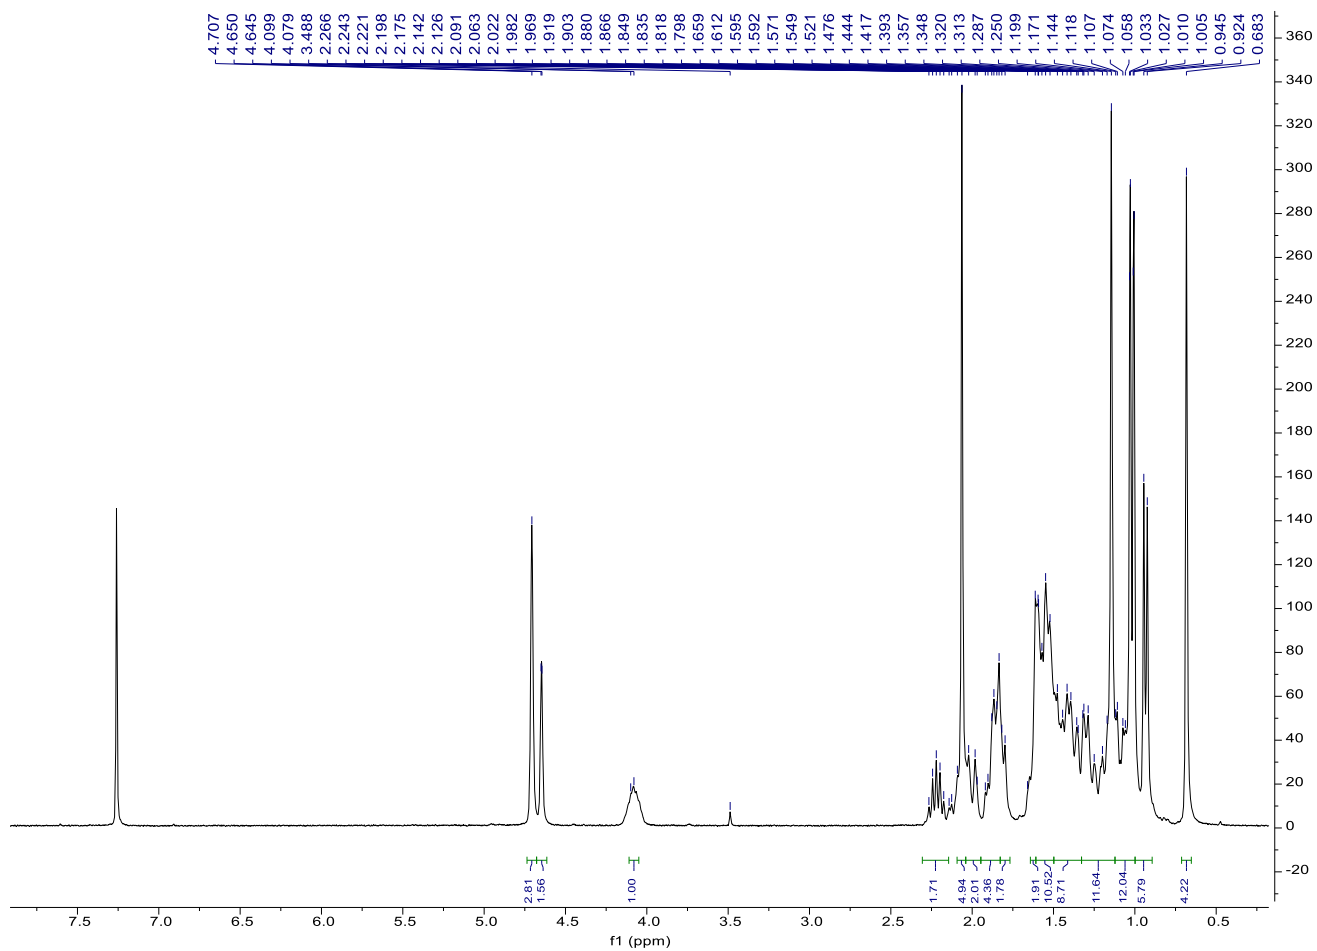

Figure S59.  $^1\text{H}$  NMR spectrum of **7** in  $\text{CDCl}_3$

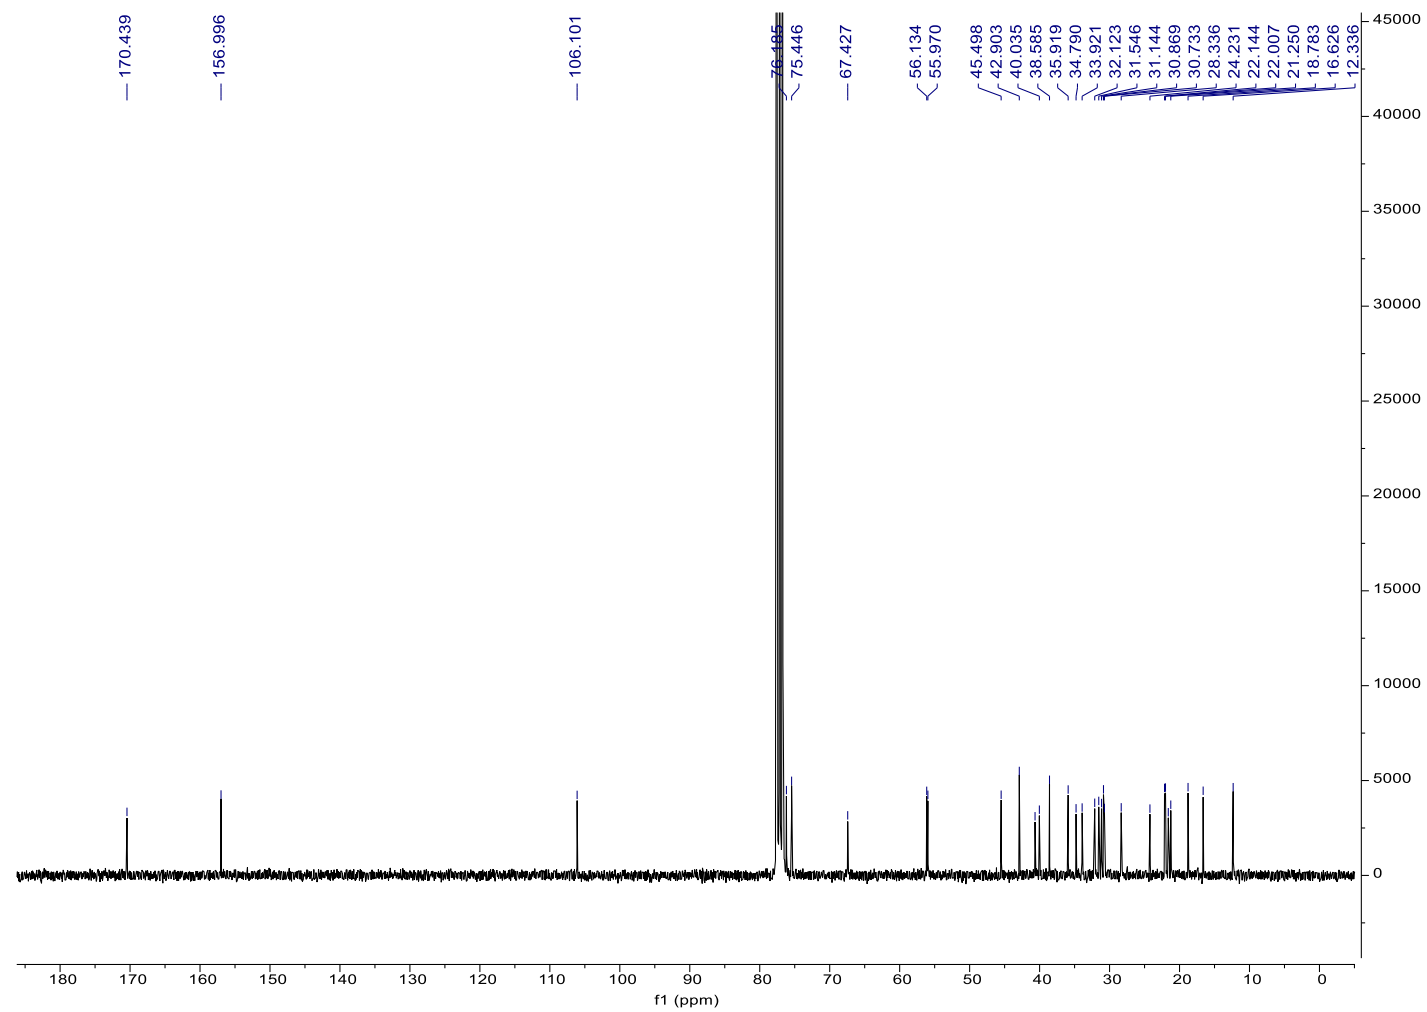

Figure S60. <sup>13</sup>C NMR spectrum of **7** in CDCl<sub>3</sub>

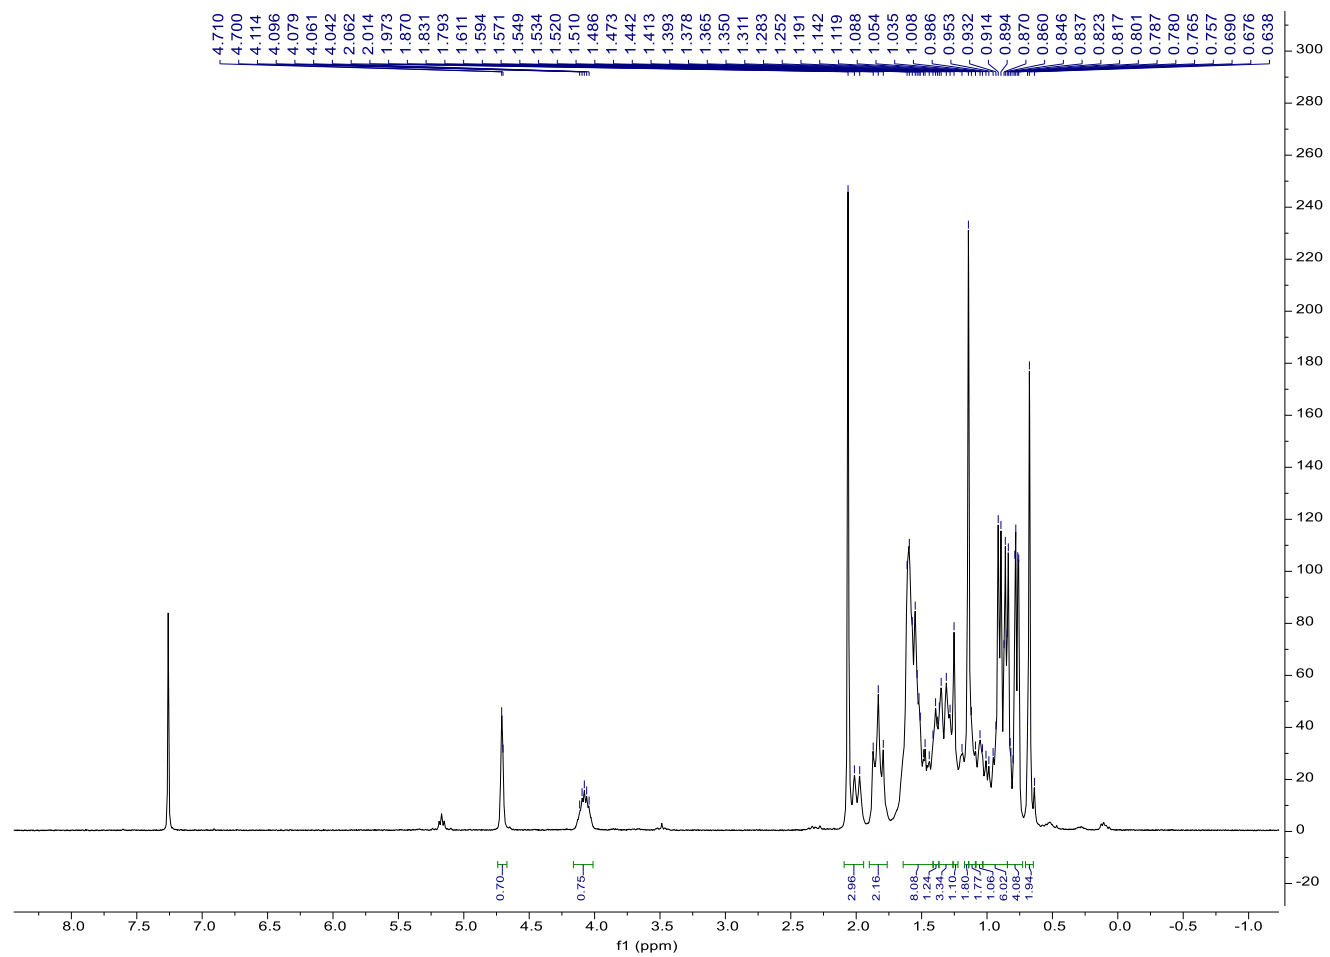

Figure S61.  $^1\text{H}$  NMR spectrum of **8** in  $\text{CDCl}_3$



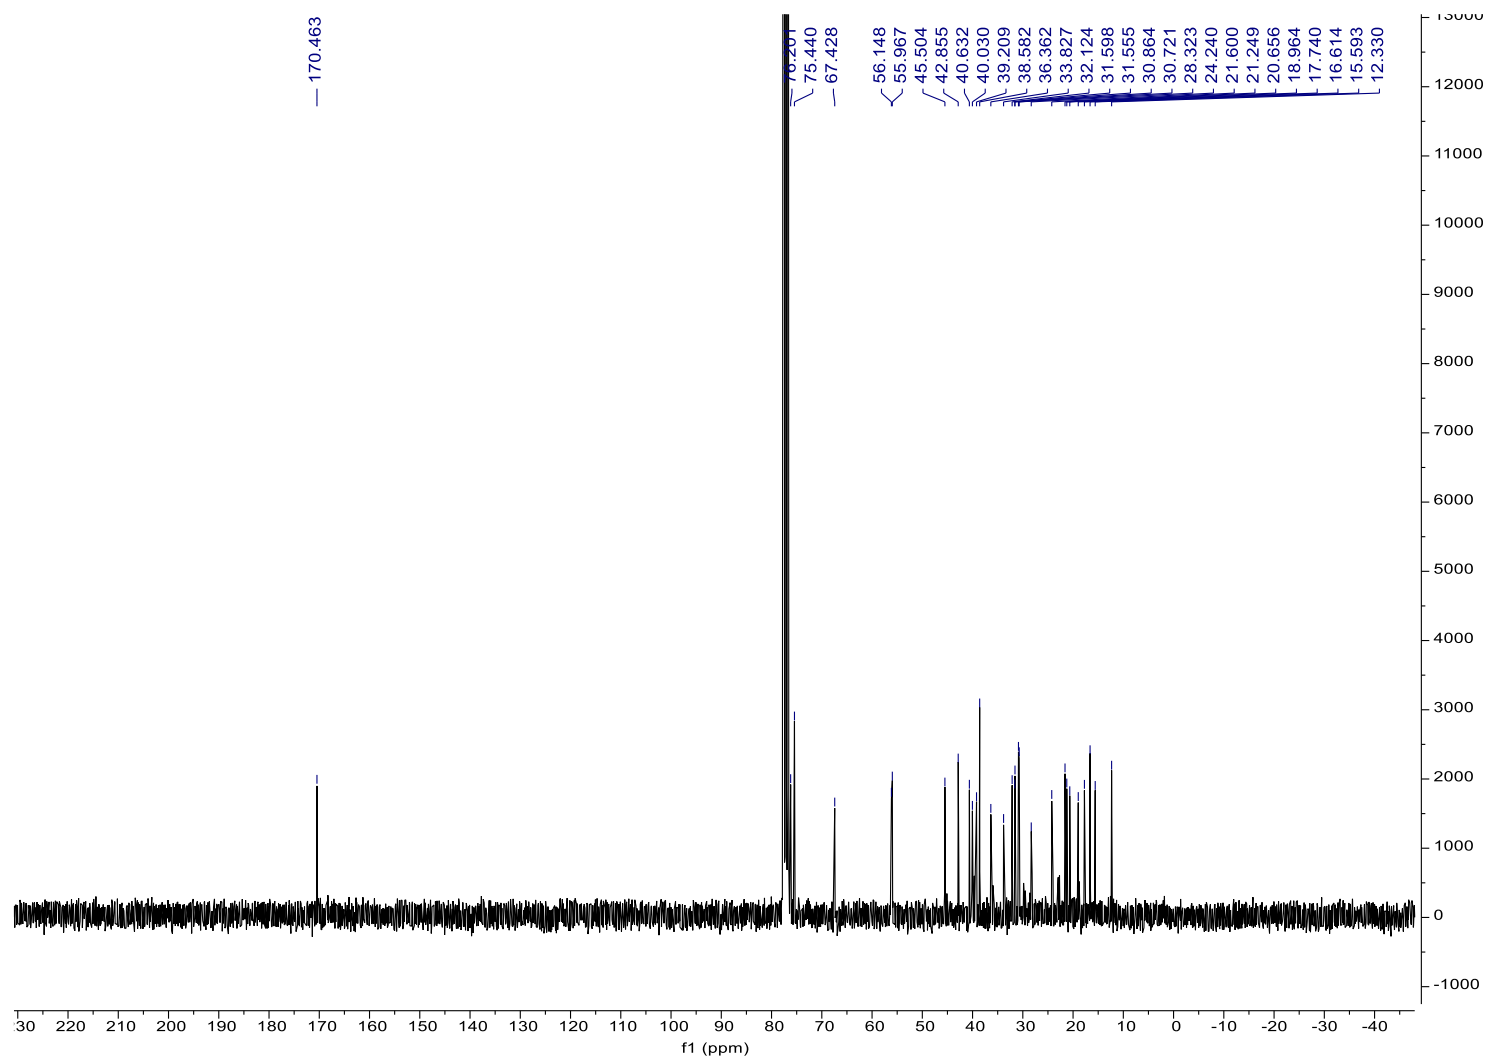

Figure S62. <sup>13</sup>C NMR spectrum of 8 in CDCl<sub>3</sub>

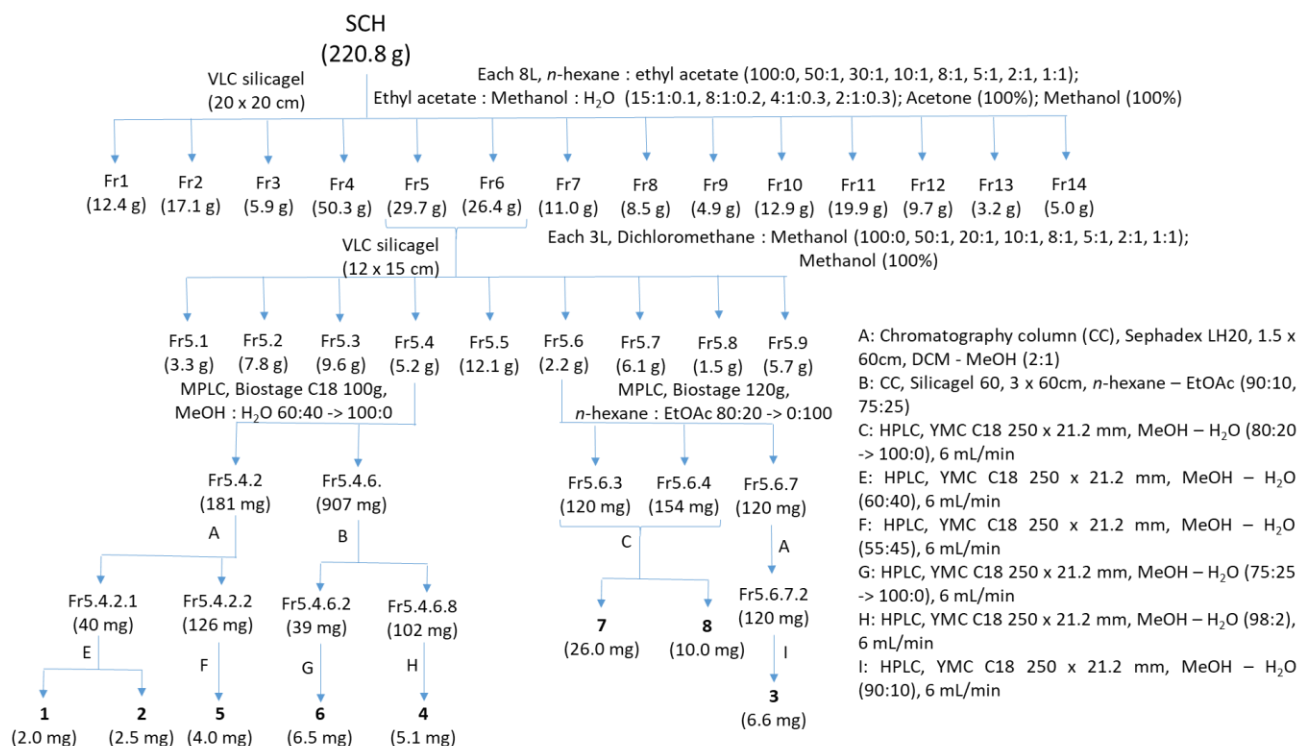

Figure S63. Isolation scheme of **1** – **8**

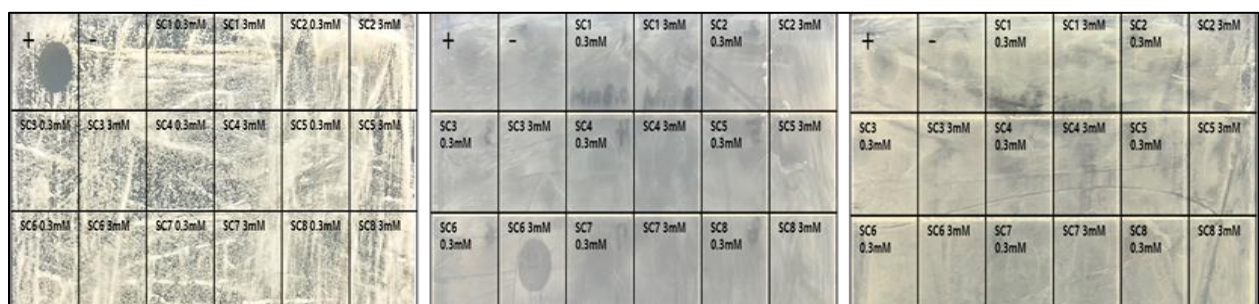

*C. albicans*

+: Nystatin 0.05 mM, 0.5  $\mu$ g

-: 50% DMSO

*S. aureus*

+: Kanamycin 0.51 mM, 3  $\mu$ g

-: 50% DMSO

*E. coli*

+: Kanamycin 0.51 mM, 3  $\mu$ g

-: 50% DMSO

Figure S64. Antimicrobial activity of **1** – **8**

Table S1. Gibbs Free Energy and Boltzmann Population of **1a** (1*R*, 2*S*, 6*R*, 7*R*, 10*R*) and **1b** (1*S*, 2*R*, 6*S*, 7*S*, 10*S*) for ECD computation

| Conformer | Gibbs Free Energy (Hartree) | Boltzmann Population (%) |
|-----------|-----------------------------|--------------------------|
| 1ac3      | -812.608773                 | 38.83                    |
| 1ac1      | -812.608670                 | 34.82                    |
| 1ac2      | -812.607879                 | 15.06                    |
| 1ac5      | -812.607050                 | 6.26                     |
| 1ac4      | -812.606843                 | 5.03                     |
| 1bc3      | -812.608773                 | 38.83                    |
| 1bc1      | -812.608670                 | 34.82                    |
| 1bc2      | -812.607879                 | 15.06                    |
| 1bc5      | -812.607050                 | 6.26                     |
| 1bc4      | -812.606843                 | 5.03                     |

Table S2. Gibbs Free Energy and Boltzmann Population of **2a** (1*R*, 2*S*, 6*S*, 7*R*, 10*S*) and **2b** (1*S*, 2*R*, 6*R*, 7*S*, 10*R*) for ECD computation

| Conformer | Gibbs Free Energy (Hartree) | Boltzmann Population (%) |
|-----------|-----------------------------|--------------------------|
| 2ac1      | -812.613471                 | 46.41                    |
| 2ac3      | -812.613091                 | 31.03                    |
| 2ac2      | -812.612714                 | 20.82                    |
| 2ac4      | -812.610039                 | 1.22                     |
| 2ac5      | -812.609219                 | 0.51                     |
| 2bc1      | -812.613471                 | 46.41                    |
| 2bc3      | -812.613091                 | 31.03                    |
| 2bc2      | -812.612714                 | 20.82                    |
| 2bc4      | -812.610039                 | 1.22                     |
| 2bc5      | -812.609219                 | 0.51                     |

Table S3. Gibbs Free Energy and Boltzmann Population of 24S isomer of **3** for NMR computation

| Conformer | Gibbs Free Energy (Hartree) | Boltzmann Population (%) |
|-----------|-----------------------------|--------------------------|
| 3ac6      | -1780.569451                | 39.64                    |
| 3ac3      | -1780.568842                | 20.80                    |
| 3ac5      | -1780.568122                | 9.70                     |
| 3ac15     | -1780.568011                | 8.63                     |
| 3ac4      | -1780.567883                | 7.53                     |
| 3ac1      | -1780.567422                | 4.62                     |
| 3ac2      | -1780.566631                | 2.00                     |
| 3ac12     | -1780.566557                | 1.85                     |
| 3ac9      | -1780.566516                | 1.77                     |
| 3ac17     | -1780.565881                | 0.90                     |
| 3ac10     | -1780.56577                 | 0.80                     |
| 3ac11     | -1780.565443                | 0.57                     |
| 3ac7      | -1780.565428                | 0.56                     |
| 3ac16     | -1780.564737                | 0.27                     |
| 3ac8      | -1780.564565                | 0.22                     |
| 3ac13     | -1780.563256                | 0.06                     |
| 3ac14     | -1780.563225                | 0.05                     |
| 3ac18     | -1780.562573                | 0.03                     |

Table S4. Gibbs Free Energy and Boltzmann Population of 24R isomer of **3** for NMR computation

| Conformer | Gibbs Free Energy (Hartree) | Boltzmann Population (%) |
|-----------|-----------------------------|--------------------------|
| 3bc10     | -1780.569204                | 27.46                    |
| 3bc6      | -1780.568771                | 17.36                    |
| 3bc12     | -1780.568587                | 14.29                    |
| 3bc8      | -1780.568109                | 8.61                     |
| 3bc9      | -1780.567985                | 7.55                     |
| 3bc16     | -1780.567874                | 6.71                     |
| 3bc7      | -1780.567576                | 4.90                     |
| 3bc11     | -1780.567352                | 3.86                     |
| 3bc2      | -1780.567044                | 2.79                     |
| 3bc5      | -1780.566549                | 1.65                     |
| 3bc4      | -1780.566374                | 1.37                     |
| 3bc13     | -1780.56625                 | 1.20                     |
| 3bc1      | -1780.566182                | 1.12                     |
| 3bc3      | -1780.565383                | 0.48                     |
| 3bc14     | -1780.565293                | 0.44                     |
| 3bc15     | -1780.564574                | 0.20                     |

Table S5. Experimental and calculated NMR chemical shift values (ppm) of compound **3** with diastereomers 24*S* and 24*R*

(a) Original excel file for the experimental and calculated NMR chemical shift values (ppm) of compound **3**

| DP4+ analysis.xlsx - Excel                                                                           |                  |          |              |                 |          |          |          |          |          |          |          |           |           |
|------------------------------------------------------------------------------------------------------|------------------|----------|--------------|-----------------|----------|----------|----------|----------|----------|----------|----------|-----------|-----------|
| Giang Nam Pham                                                                                       |                  |          |              |                 |          |          |          |          |          |          |          |           |           |
| File Home Insert Page Layout Formulas Data Review View Help ChemOffice18 Tell me what you want to do |                  |          |              |                 |          |          |          |          |          |          |          |           |           |
| F15                                                                                                  |                  |          |              |                 |          |          |          |          |          |          |          |           |           |
| A                                                                                                    | B                | C        | D            | E               | F        | G        | H        | I        | J        | K        | L        | M         | N         |
| 1                                                                                                    | Functional       | Solvent? | Basis Set    | Type of Data    |          |          |          |          |          |          |          |           |           |
| 2                                                                                                    | mPW1PW91         | PCM      | 6-311+G(d,p) | Unscaled Shifts |          |          |          |          |          |          |          |           |           |
| 3                                                                                                    |                  |          |              |                 |          |          |          |          |          |          |          |           |           |
| 12                                                                                                   |                  | DP4+     | 0.00%        | 100.00%         | -        | -        | -        | -        | -        | -        | -        | -         | -         |
| 14                                                                                                   | Nuclei           | sp2?     | Experimental | Isomer 1        | Isomer 2 | Isomer 3 | Isomer 4 | Isomer 5 | Isomer 6 | Isomer 7 | Isomer 8 | Isomer 9  | Isomer 10 |
| 15                                                                                                   | C                |          | 36.78        | 40.12           | 40.00    |          |          |          |          |          |          |           |           |
| 16                                                                                                   | C                |          | 28.18        | 31.21           | 31.22    |          |          |          |          |          |          |           |           |
| 17                                                                                                   | C                |          | 76.75        | 81.05           | 80.96    |          |          |          |          |          |          |           |           |
| 18                                                                                                   | C                |          | 75.29        | 80.35           | 80.37    |          |          |          |          |          |          |           |           |
| 19                                                                                                   | C                | x        | 142.16       | 153.02          | 153.13   |          |          |          |          |          |          |           |           |
| 20                                                                                                   | C                | x        | 117.94       | 127.02          | 126.95   |          |          |          |          |          |          |           |           |
| 21                                                                                                   | C                |          | 31.56        | 35.28           | 35.30    |          |          |          |          |          |          |           |           |
| 22                                                                                                   | C                |          | 31.66        | 35.48           | 35.44    |          |          |          |          |          |          |           |           |
| 23                                                                                                   | C                |          | 50.59        | 54.38           | 54.40    |          |          |          |          |          |          |           |           |
| 24                                                                                                   | C                |          | 38.18        | 44.54           | 44.52    |          |          |          |          |          |          |           |           |
| 25                                                                                                   | C                |          | 21.04        | 24.60           | 24.61    |          |          |          |          |          |          |           |           |
| 26                                                                                                   | C                |          | 39.82        | 43.30           | 43.28    |          |          |          |          |          |          |           |           |
| 27                                                                                                   | C                |          | 42.44        | 48.35           | 48.38    |          |          |          |          |          |          |           |           |
| 28                                                                                                   | C                |          | 56.83        | 60.15           | 60.13    |          |          |          |          |          |          |           |           |
| 29                                                                                                   | C                |          | 24.43        | 28.06           | 28.07    |          |          |          |          |          |          |           |           |
| 30                                                                                                   | C                |          | 28.39        | 32.41           | 32.50    |          |          |          |          |          |          |           |           |
| 31                                                                                                   | C                |          | 55.82        | 60.52           | 60.58    |          |          |          |          |          |          |           |           |
| 32                                                                                                   | C                |          | 12           | 12.94           | 12.93    |          |          |          |          |          |          |           |           |
| 33                                                                                                   | C                |          | 20.39        | 22.08           | 22.06    |          |          |          |          |          |          |           |           |
| 34                                                                                                   | C                |          | 36.26        | 42.69           | 42.34    |          |          |          |          |          |          |           |           |
| 35                                                                                                   | C                |          | 18.89        | 19.16           | 19.16    |          |          |          |          |          |          |           |           |
| 36                                                                                                   | C                |          | 28.97        | 30.88           | 31.22    |          |          |          |          |          |          |           |           |
| 37                                                                                                   | C                |          | 31.09        | 31.12           | 36.00    |          |          |          |          |          |          |           |           |
| 38                                                                                                   | C                |          | 75.4         | 80.58           | 79.89    |          |          |          |          |          |          |           |           |
| 39                                                                                                   | C                |          | 33.12        | 39.41           | 37.35    |          |          |          |          |          |          |           |           |
| 40                                                                                                   | C                |          | 16.85        | 16.95           | 17.67    |          |          |          |          |          |          |           |           |
| 41                                                                                                   | C                |          | 17.18        | 18.52           | 17.94    |          |          |          |          |          |          |           |           |
| 42                                                                                                   | C                |          | 51.68        | 64.15           | 65.18    |          |          |          |          |          |          |           |           |
| 43                                                                                                   | H                |          | 1.13         | 1.19            | 1.18     |          |          |          |          |          |          |           |           |
| 44                                                                                                   | H                |          | 1.84         | 1.88            | 1.88     |          |          |          |          |          |          |           |           |
| 45                                                                                                   | H                |          | 1.6          | 1.62            | 1.62     |          |          |          |          |          |          |           |           |
| 46                                                                                                   | H                |          | 1.9          | 1.83            | 1.83     |          |          |          |          |          |          |           |           |
| 47                                                                                                   | H                |          | 3.27         | 3.20            | 3.21     |          |          |          |          |          |          |           |           |
| 48                                                                                                   | H                |          | 4.06         | 4.09            | 4.08     |          |          |          |          |          |          |           |           |
| 49                                                                                                   | H                | x        | 5.74         | 6.09            | 6.10     |          |          |          |          |          |          |           |           |
| Main Detailed Results                                                                                |                  |          |              |                 |          |          |          |          |          |          |          |           |           |
| Ready                                                                                                |                  |          |              |                 |          |          |          |          |          |          |          |           |           |
| A                                                                                                    | B                | C        | D            | E               | F        | G        | H        | I        | J        | K        | L        | M         | N         |
| 1                                                                                                    | Functional       | Solvent? | Basis Set    | Type of Data    |          |          |          |          |          |          |          |           |           |
| 2                                                                                                    | mPW1PW91         | PCM      | 6-311+G(d,p) | Unscaled Shifts |          |          |          |          |          |          |          |           |           |
| 3                                                                                                    |                  |          |              |                 |          |          |          |          |          |          |          |           |           |
| 4                                                                                                    |                  |          | Isomer 1     | Isomer 2        | Isomer 3 | Isomer 4 | Isomer 5 | Isomer 6 | Isomer 7 | Isomer 8 | Isomer 9 | Isomer 10 | Isomer 11 |
| 5                                                                                                    | sDP4+ (H data)   | 0.25%    | 99.75%       | -               | -        | -        | -        | -        | -        | -        | -        | -         | -         |
| 6                                                                                                    | sDP4+ (C data)   | 12.83%   | 87.17%       | -               | -        | -        | -        | -        | -        | -        | -        | -         | -         |
| 7                                                                                                    | sDP4+ (all data) | 0.04%    | 99.96%       | -               | -        | -        | -        | -        | -        | -        | -        | -         | -         |
| 8                                                                                                    | uDP4+ (H data)   | 0.39%    | 99.61%       | -               | -        | -        | -        | -        | -        | -        | -        | -         | -         |
| 9                                                                                                    | uDP4+ (C data)   | 2.53%    | 97.47%       | -               | -        | -        | -        | -        | -        | -        | -        | -         | -         |
| 10                                                                                                   | uDP4+ (all data) | 0.01%    | 99.99%       | -               | -        | -        | -        | -        | -        | -        | -        | -         | -         |
| 11                                                                                                   | DP4+ (H data)    | 0.00%    | 100.00%      | -               | -        | -        | -        | -        | -        | -        | -        | -         | -         |
| 12                                                                                                   | DP4+ (C data)    | 0.38%    | 99.62%       | -               | -        | -        | -        | -        | -        | -        | -        | -         | -         |
| 13                                                                                                   | DP4+ (all data)  | 0.00%    | 100.00%      | -               | -        | -        | -        | -        | -        | -        | -        | -         | -         |



(b) Reorganized table for the experimental and calculated NMR chemical shift values (ppm) of compound **3**

| Number | Experimental | Diastereomer 24 <i>S</i> | Diastereomer 24 <i>R</i> |
|--------|--------------|--------------------------|--------------------------|
| C-1    | 36.78        | 40.12                    | 40.00                    |
| C-2    | 28.18        | 31.21                    | 31.22                    |
| C-3    | 76.75        | 81.05                    | 80.96                    |
| C-4    | 75.29        | 80.35                    | 80.37                    |
| C-5    | 142.16       | 153.02                   | 153.13                   |
| C-6    | 117.94       | 127.02                   | 126.95                   |
| C-7    | 31.56        | 35.28                    | 35.30                    |
| C-8    | 31.66        | 35.48                    | 35.44                    |
| C-9    | 50.59        | 54.38                    | 54.40                    |
| C-10   | 38.18        | 44.54                    | 44.52                    |
| C-11   | 21.04        | 24.60                    | 24.61                    |
| C-12   | 39.82        | 43.30                    | 43.28                    |
| C-13   | 42.44        | 48.35                    | 48.38                    |
| C-14   | 56.83        | 60.15                    | 60.13                    |
| C-15   | 24.43        | 28.06                    | 28.07                    |
| C-16   | 28.39        | 32.41                    | 32.50                    |
| C-17   | 55.82        | 60.52                    | 60.58                    |
| C-18   | 12.00        | 12.94                    | 12.93                    |
| C-19   | 20.39        | 22.08                    | 22.06                    |
| C-20   | 36.26        | 42.69                    | 42.34                    |
| C-21   | 18.89        | 19.16                    | 19.16                    |
| C-22   | 28.97        | 30.88                    | 31.22                    |
| C-23   | 31.09        | 31.12                    | 36.00                    |
| C-24   | 75.40        | 80.58                    | 79.89                    |
| C-25   | 33.12        | 39.41                    | 37.35                    |
| C-26   | 16.85        | 16.95                    | 17.67                    |
| C-27   | 17.18        | 18.52                    | 17.94                    |
| C-28   | 51.68        | 64.15                    | 65.18                    |

|       |      |      |      |
|-------|------|------|------|
| H-1a  | 1.13 | 1.19 | 1.18 |
| H-1b  | 1.84 | 1.88 | 1.88 |
| H-2a  | 1.60 | 1.62 | 1.62 |
| H-2b  | 1.90 | 1.83 | 1.83 |
| H-3   | 3.27 | 3.20 | 3.21 |
| H-4   | 4.06 | 4.09 | 4.08 |
| H-6   | 5.74 | 6.09 | 6.10 |
| H-7a  | 1.58 | 1.67 | 1.66 |
| H-7b  | 2.10 | 2.14 | 2.13 |
| H-8   | 1.44 | 1.56 | 1.56 |
| H-9   | 0.99 | 1.01 | 1.00 |
| H-11a | 1.49 | 1.46 | 1.46 |
| H-11b | 1.49 | 1.54 | 1.54 |
| H-12a | 1.16 | 1.24 | 1.25 |
| H-12b | 2.02 | 2.04 | 2.05 |
| H-14  | 1.00 | 1.10 | 1.09 |
| H-15a | 1.10 | 1.19 | 1.18 |
| H-15b | 1.62 | 1.60 | 1.59 |
| H-16a | 1.27 | 1.37 | 1.34 |
| H-16b | 1.89 | 1.90 | 1.92 |
| H-17  | 1.14 | 1.15 | 1.15 |
| H-18a | 0.69 | 0.57 | 0.57 |
| H-18b | 0.69 | 0.67 | 0.66 |
| H-18c | 0.69 | 1.04 | 1.04 |
| H-19a | 1.02 | 0.88 | 0.87 |
| H-19b | 1.02 | 0.92 | 0.89 |
| H-19c | 1.02 | 1.35 | 1.36 |
| H-20  | 1.40 | 1.35 | 1.33 |
| H-21a | 0.95 | 0.43 | 0.61 |
| H-21b | 0.95 | 0.96 | 1.00 |
| H-21c | 0.95 | 1.24 | 1.07 |

|       |      |      |      |
|-------|------|------|------|
| H-22a | 1.07 | 0.78 | 0.81 |
| H-22b | 1.42 | 1.82 | 1.54 |
| H-23a | 1.41 | 1.35 | 1.40 |
| H-23b | 1.70 | 1.52 | 1.73 |
| H-25  | 1.95 | 2.00 | 1.92 |
| H-26a | 0.93 | 0.82 | 0.80 |
| H-26b | 0.93 | 0.73 | 0.81 |
| H-26c | 0.93 | 1.45 | 1.48 |
| H-27a | 0.94 | 0.75 | 0.73 |
| H-27b | 0.94 | 0.93 | 0.96 |
| H-27c | 0.94 | 0.98 | 1.00 |
| H-28a | 3.56 | 3.94 | 3.78 |
| H-28b | 3.68 | 3.94 | 4.00 |

---
